# Supplementary material for: Construction of fluorescence-tunable pyrido-fused benzimidazoles via direct intramolecular C–H amination under transition-metal-free conditions
Source: Royal Society of Chemistry journal article supplement (doi:10.1039/c4ra08954e), 2014-01-01
Supplement: c4ra08954e1.pdf [file c4ra08954e1.pdf]

## Supporting Information

### Construction of Fluorescence-tunable Pyrido-Fused Benzimidazoles *via* Direct Intramolecular C-H amination under Transition-Metal-Free Conditions

Weitao Gong<sup>ab</sup>, Peng Gao<sup>b</sup>, Gang Li<sup>a</sup>, Hassan Mehdi<sup>b</sup>, Guiling Ning<sup>a\*</sup> and

Jingjie Yu<sup>c</sup>

<sup>a</sup> state Key Laboratory of Fine Chemicals, School of Chemical Engineering, Dalian University of Technology, Dalian, 116024, China. Fax: +86 411-8498-6065; Tel: +86 411-8498-6067; E-mail:wtgong@dlut.edu.cn.

<sup>b</sup>State Key Laboratory of Fine Chemicals, School of Chemistry, Dalian University of Technology, Dalian, 116024, China. Fax: +86 411-8498-6065; Tel: +86 411-8498-6067

<sup>c</sup>Dalian Luminglight Science and Technology Co., Ltd. Dalian, 116025, China

ninggl@dlut.edu.cn

#### Table of contents

|                                                                                                                                                   |    |
|---------------------------------------------------------------------------------------------------------------------------------------------------|----|
| General Information                                                                                                                               | 1  |
| General Procedure for the Synthesis of nitrophenylpyridinium perchlorate derivatives (1e, 1j and 1m)                                              | 1  |
| General Procedure for the Synthesis of pyridinium perchlorate derivatives (1a, 1b, 1c, 1d, 1f, 1g, 1h, 1i, 1j, 1k, 1l, 1n, 1o and 1p)             | 3  |
| General Procedure for the Synthesis of pyrido-fused benzimidazole derivatives (2a, 2b, 2c, 2d, 2e, 2f, 2g, 2h, 2i, 2j, 2k, 2l, 2m, 2n, 2o and 2p) | 6  |
| Crystal Structure Data                                                                                                                            | 9  |
| Spectrum Chart                                                                                                                                    | 11 |

**General Information:**  $^1\text{H}$  NMR and  $^{13}\text{C}$  NMR spectra were measured on a VARIAN INOVA-400 and AVANCE II 400 spectrometer with chemical shifts reported as ppm (in  $\text{CH}_3\text{CN}$ -  $d^3$  and  $\text{CDCl}_3$ , TMS as internal standard). Mass spectrometric data were obtained on a Q-ToF MS spectrometry. Absorption spectra were recorded on a HITACHI U-4100 spectrometer. Fluorescence spectra were taken on a JASCO FP-6300 spectrometer. TLC analysis was performed on silica gel plates and column chromatography was conducted over silica gel (mesh 200-300).

**General Procedure for the Synthesis of nitrophenylpyridinium perchlorate derivatives (1e, 1j and 1m)<sup>1</sup>:**

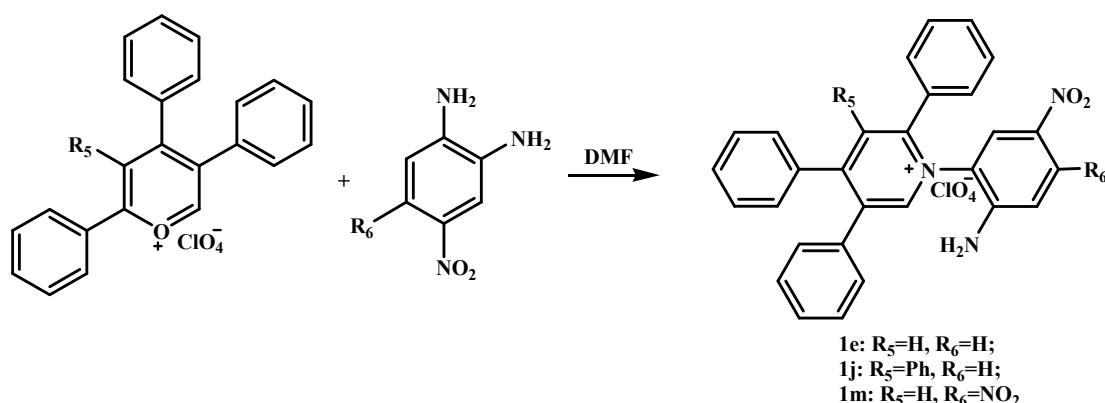

2,4,5-triphenylpyrylium perchlorate (0.2g, 0.49mmol) and 4-Nitro-o-phenylenediamine (0.090g, 0.59mmol) was stirred in 5mL DMF at  $78^\circ\text{C}$ . After 4h, the solvent was concentrated in vacuo, diluted with  $\text{CH}_3\text{CN}$  (2~3ml), then 30mL diethyl ether was slowly poured into the solution, and the deep yellow precipitate was formed. The crude product was washed with diethyl ether ( $3\times 10\text{mL}$ ) and dried to give pure target 2,4,5-triphenylpyridinium **1e**.

**1-(5-nitrophenyl)-2,4,5-triphenylpyridinium perchlorate (1e):**  $^1\text{H}$  NMR (400 MHz, DMSO)  $\delta$  9.31 (s, 1H), 8.55 (s, 1H), 8.41 (s, 1H), 8.13 – 7.87 (m, 1H), 7.69 – 7.53 (m, 3H), 7.47 (dd,  $J = 16.9, 9.3$  Hz, 10H), 7.38 – 7.20 (m, 3H), 6.78 (d,  $J = 9.2$  Hz, 1H);  $^{13}\text{C}$  NMR (DMSO, 100 MHz)  $\delta$ : 157.36, 154.88, 149.87, 148.57, 139.07, 135.65, 135.58, 134.08, 131.61, 131.52, 131.43, 130.89, 130.21, 130.02, 129.75, 129.60, 129.41, 129.36, 128.91, 127.72, 126.74, 124.42, 116.02; HRMS calcd for  $\text{C}_{29}\text{H}_{22}\text{N}_3\text{O}_2$  ( $\text{M}^+$ ) 444.1712, found 444.1726. Yield: 57%.

**1-(5-nitrophenyl)-1,2,4,5-tetraphenylpyridinium perchlorate (1j):** <sup>1</sup>H NMR (400 MHz, DMSO) δ 9.43 (s, 1H), 8.57 (d, *J* = 16.8 Hz, 1H), 7.94 (d, *J* = 2.6 Hz, 1H), 7.41 – 7.30 (m, 5H), 7.27 (d, *J* = 3.6 Hz, 4H), 7.22 – 7.09 (m, 6H), 7.09 – 6.87 (m, 7H), 6.74 (d, *J* = 23.8 Hz, 1H), 3.39 (s, 3H); <sup>13</sup>C NMR (DMSO, 100 MHz) δ: 154.37, 154.88, 149.06, 146.00, 142.28, 140.13, 134.70, 133.78, 130.58, 130.21, 130.01, 129.69, 129.12, 128.43, 127.89, 127.44, 127.33, 124.57, 115.26; HRMS calcd for C<sub>35</sub>H<sub>26</sub>N<sub>3</sub>O<sub>2</sub> (M<sup>+</sup>) 520.2020, found 520.2017. Yield: 56%.

**1-(4,5-dinitrophenyl)-2,4,5-triphenylpyridinium perchlorate (1m):** <sup>1</sup>H NMR (500 MHz, DMSO) δ 9.33 (d, *J* = 18.2 Hz, 1H), 8.76 (s, 1H), 8.46 (s, 1H), 8.28 – 6.70 (m, 17H), 5.75 (s, 1H). <sup>13</sup>C NMR(100 MHz, DMSO): δ=157.293, 154.237, 149.757, 147.930, 146.656, 138.559, 134.912, 133.502, 131.296, 131.091, 130.690, 130.568, 129.605, 129.545, 129.355, 129.249, 128.984, 128.620, 128.370, 125.921, 124.109, 110.690; HRMS calcd for C<sub>29</sub>H<sub>21</sub>N<sub>4</sub>O<sub>4</sub> (M<sup>+</sup>) 489.1563, found 489.1561. Yield: 57%.

**Safety note:**

Organic perchlorates are unstable and highly explosive! Only we can synthesis in simal scal, and these should be handled with great cautions.

**General Procedure for the Synthesis of pyridinium perchlorate derivatives (1a,1b,1c,1d,1f,1g,1h,1i,1j,1k,1l,1n,1o and 1p):**

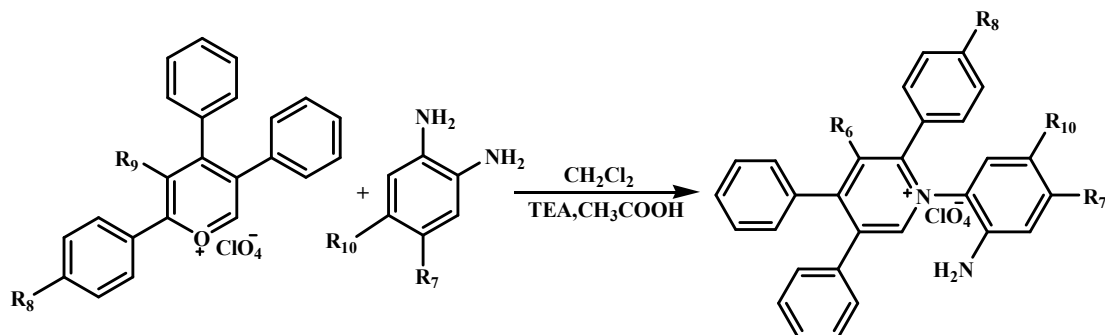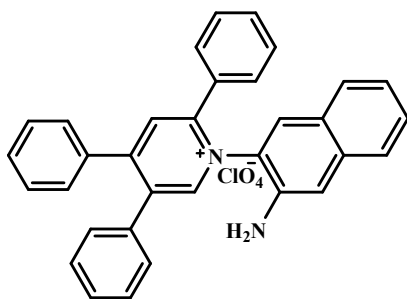

1n

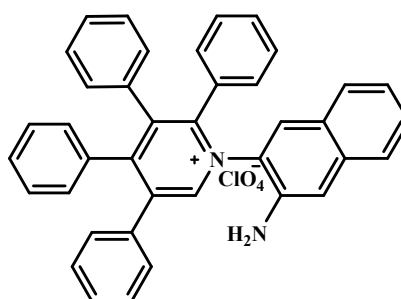

1o

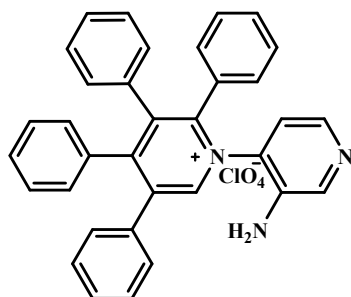

1p

- 1a: R<sub>9</sub>=H, R<sub>7</sub>=H, R<sub>8</sub>=H, R<sub>10</sub>=H;  
 1b: R<sub>9</sub>=H, R<sub>7</sub>=CH<sub>3</sub>, R<sub>8</sub>=H, R<sub>10</sub>=H;  
 1c: R<sub>9</sub>=H, R<sub>7</sub>=OCH<sub>3</sub>, R<sub>8</sub>=H, R<sub>10</sub>=H;  
 1d: R<sub>9</sub>=H, R<sub>7</sub>=Cl, R<sub>8</sub>=H, R<sub>10</sub>=H;  
 1f: R<sub>9</sub>=H, R<sub>7</sub>=H, R<sub>8</sub>=Ph, R<sub>10</sub>=H;  
 1g: R<sub>9</sub>=Ph, R<sub>7</sub>=H, R<sub>8</sub>=H, R<sub>10</sub>=H;  
 1h: R<sub>9</sub>=Ph, R<sub>7</sub>=CH<sub>3</sub>, R<sub>8</sub>=H, R<sub>10</sub>=H;  
 1i: R<sub>9</sub>=Ph, R<sub>7</sub>=Cl, R<sub>8</sub>=H, R<sub>10</sub>=H;  
 1k: R<sub>9</sub>=H, R<sub>7</sub>=H, R<sub>8</sub>=H, R<sub>10</sub>=COOMe;  
 1l: R<sub>9</sub>=Ph, R<sub>7</sub>=Br, R<sub>8</sub>=H, R<sub>10</sub>=H

2,4,5-triphenylpyrylium perchlorate (0.2g, 0.49mmol), o-phenylenediamine (0.064g, 0.59mmol) and triethylamine (50mg, 0.49mmol) was stirred in dichloromethane (15ml) at room temperature. After 20 minutes, acetic acid (59mg, 0.98mmol) was added into the solution. After 2h, dichloromethane was concentrated under reduced pressure to 2~3mL. 30mL diethyl ether was poured into the solution, and the yellow precipitate was formed. The filtered precipitate was washed by diethyl ether (3×10mL) and dried to give pure target 2,4,5-triphenylpyridinium **1a**.

**1-(2-aminophenyl)-2,4,5-triphenylpyridinium perchlorate (1a).** <sup>1</sup>H NMR(400MHz, CD<sub>3</sub>CN) δ 8.71 (s, 1H), 8.21 (s, 1H), 7.29-7.58 (m, 15H), 7.22 (m, 1H), 7.16 (d, *J*=8Hz, 1H), 6.81 (d, *J*=8Hz, 1H), 6.68 (m, 1H), 4.62 (s, 2H); <sup>13</sup>C NMR (100MHz, CD<sub>3</sub>CN) δ: 159.2, 155.9, 148.1, 143.3, 140.7, 136.5, 134.7, 132.8, 132.7, 132.5, 132.0, 131.4, 130.8, 130.6, 130.4, 130.3, 129.9, 129.8, 129.5, 128.6, 127.6, 117.9. HRMS (ESI) *m/z* calcd for C<sub>29</sub>H<sub>23</sub>N<sub>2</sub> [M]<sup>+</sup>, 399.1816; found, 399.1846. Yield: 87%.

**1-(4-methyl-2-aminophenyl)-2,4,5-triphenylpyridinium perchlorate (1b):** <sup>1</sup>H NMR (400 MHz, DMSO): δ 9.06 (d, *J* = 8.5 Hz, 1H), 9.06 (d, *J* = 8.5 Hz, 1H), 8.36 (s, 1H), 7.62 – 7.53 (m, 2H), 7.67 – 7.53 (m, 2H), 7.45 (dt, *J* = 17.7, 5.1 Hz, 1H), 7.32 (dd, *J* = 6.6, 2.6 Hz, 2H), 7.10 (d, *J* = 8.2 Hz, 1H), 6.98 (d, *J* = 8.4 Hz, 1H), 6.67 (d, *J* = 8.3 Hz, 1H), 6.57 (s, 1H), 6.36 (d, *J* = 8.2 Hz, 1H), 2.11 (d, *J* = 36.0 Hz, 3H).; <sup>13</sup>C NMR (CD<sub>3</sub>CN, 100 MHz) δ: 156.66, 154.94, 154.70, 148.45, 148.24, 143.14, 138.80, 135.73, 134.12, 131.14, 130.69, 130.27, 130.02, 129.78, 129.73, 129.49, 129.31, 129.26, 128.76, 128.72, 117.28, 116.91, 21.39; HRMS (ESI) *m/z* calcd for C<sub>30</sub>H<sub>25</sub>N<sub>2</sub> [M]<sup>+</sup>, 413.2012; found, 413.2032. Yield: 72%.

**1-(4-methoxyl-2-aminophenyl)-2,4,5-triphenylpyridinium perchlorate (1c):** <sup>1</sup>H NMR (400 MHz, CD<sub>3</sub>CN) δ 8.70 (d, *J* = 14.3 Hz, 1H), 8.19 (d, *J* = 8.5 Hz, 1H), 7.65 – 7.47 (m, 4H), 7.47 – 7.35 (m, 9H), 7.32 (dd, *J* = 8.0, 1.3 Hz, 2H), 7.06 (d, *J* = 8.9 Hz, 1H), 6.32 (d, *J* = 2.6 Hz, 1H), 6.23 (dd, *J* = 8.9, 2.6 Hz, 1H), 3.71 (s, 3H); <sup>13</sup>C NMR (100 MHz, DMSO) δ: 162.03, 157.94, 155.23, 147.65, 143.56, 143.51, 139.57, 135.48, 133.70, 131.66, 131.60, 130.98, 130.37, 129.81, 129.54, 129.41, 129.35, 129.27, 128.87, 128.85, 128.62, 128.52, 120.34, 117.37, 104.09, 100.33, 55.17; HRMS calcd for C<sub>30</sub>H<sub>25</sub>N<sub>2</sub>O (M<sup>+</sup>) 429.1961, found 429.1970. Yield: 77%.

**1-(4-chloro-2-aminophenyl)-2,4,5-triphenylpyridinium perchlorate (1d):** <sup>1</sup>H NMR (400 MHz, DMSO) δ 9.17 (d, *J* = 10.9 Hz, 1H), 8.38 (s, 1H), 7.59 (t, *J* = 6.3 Hz, 2H), 7.54 – 7.38 (m, 11H), 7.32 (d, *J* = 8.4 Hz, 3H), 6.78 (dd, *J* = 17.3, 5.5 Hz, 1H), 6.58 (d, *J* = 10.7 Hz, 1H), 6.03 (d, *J* = 55.3 Hz, 2H); <sup>13</sup>C NMR (100 MHz, DMSO) δ: 156.56, 154.37, 154.27, 144.48, 138.50, 135.48, 135.18, 133.59, 131.45, 130.26, 129.77, 129.58, 129.54, 129.22, 129.03, 128.83, 128.78, 128.35, 124.80, 118.21, 117.63, 115.20, 115.16; HRMS calcd for C<sub>29</sub>H<sub>22</sub>ClN<sub>2</sub> (M<sup>+</sup>) 433.1466, found 433.1453. Yield: 52%.

**1-(2-aminophenyl)-2-(biphenyl)-4,5-diphenylpyridinium perchlorate (1f):** <sup>1</sup>H NMR (400 MHz, CDCl<sub>3</sub>) δ 8.44 (s, 1H), 8.09 (s, 1H), 7.65 – 7.51 (m, 6H), 7.39 (ddt, *J* = 31.0, 23.4, 7.6 Hz, 13H), 7.26 (s, 2H), 7.19 (t, *J* = 7.8 Hz, 1H), 7.05 (d, *J* = 8.0 Hz, 1H), 6.77 – 6.60 (m, 2H); <sup>13</sup>C NMR (100 MHz, CD<sub>3</sub>CN) δ: 159.19, 154.48, 146.37, 143.42, 142.17, 140.18, 139.45, 135.47, 133.26, 132.01, 130.02, 129.90, 129.80, 128.98, 128.79, 127.21, 127.14, 117.49; HRMS calcd for C<sub>35</sub>H<sub>27</sub>N<sub>2</sub> (M<sup>+</sup>) 475.2169, found 475.2168. Yield: 80%.

**1-(2-aminophenyl)-1,2,4,5-tetraphenylpyridinium perchlorate (1g):** <sup>1</sup>H NMR (400 MHz, DMSO) δ 9.24 (s, 1H), 7.53 – 7.20 (m, 10H), 7.07 (ddd, *J* = 32.1, 14.8, 6.9 Hz, 15H), 6.67 (d, *J* = 8.2 Hz, 1H), 6.49 (t, *J* = 7.6 Hz, 1H), 5.80 (s, 2H); <sup>13</sup>C NMR (100 MHz, CD<sub>3</sub>CN) δ: 157.21, 154.76, 146.09, 143.07, 142.82, 140.48, 135.51, 134.43, 131.60, 130.63, 130.32, 128.85, 128.42, 128.28, 128.10, 127.87, 127.41, 116.54, 115.69; HRMS calcd for C<sub>35</sub>H<sub>27</sub>N<sub>2</sub> (M<sup>+</sup>) 475.2169, found 475.2163. Yield: 89%.

**1-(4-methyl-2-aminophenyl)-2,3,4,5-tetraphenylpyridinium perchlorate (1h):** <sup>1</sup>H NMR (400 MHz, CDCl<sub>3</sub>) δ 8.52 (d, *J* = 7.3 Hz, 1H), 8.02 (s, 1H), 7.52 (d, *J* = 7.7 Hz, 1H), 7.35 (d, *J* = 5.8 Hz, 3H), 7.30 – 7.16 (m, 6H), 7.16 – 6.67 (m, 12H), 6.55 (d, *J* = 8.6 Hz, 1H), 6.44 (s, 1H), 6.36 (d, *J* = 8.0 Hz, 1H), 5.30 (s, 1H), 2.14 (d, *J* = 21.1 Hz, 3H); <sup>13</sup>C NMR (100 MHz, CD<sub>3</sub>CN): δ=144.68,

142.22, 141.72, 135.29, 132.06, 132.06, 131.33, 131.11, 130.90, 130.04, 129.89, 128.58, 127.67, 118.29, 117.27, 21.48; HRMS calcd for C<sub>36</sub>H<sub>29</sub>N<sub>2</sub> (M<sup>+</sup>) 489.2325, found 489.2317. Yield: 70%.

**1-(4-chloro-2-aminophenyl)-2,3,4,5-tetraphenylpyridinium perchlorate (1i):** <sup>1</sup>H NMR (400 MHz, DMSO) δ 9.31 (d, *J* = 6.5 Hz, 1H), 7.52 (d, *J* = 2.4 Hz, 1H), 7.44 – 7.28 (m, 6H), 7.28 – 7.21 (m, 2H), 7.21 – 7.06 (m, 6H), 7.06 – 6.92 (m, 7H), 6.73 – 6.62 (m, 1H), 6.55 (dd, *J* = 8.5, 2.2 Hz, 1H), 6.06 (d, *J* = 47.9 Hz, 2H); <sup>13</sup>C NMR(100 MHz, CD<sub>3</sub>CN): δ=157.12, 154.43, 145.80, 144.02, 142.25, 139.83, 135.11, 133.74, 130.84, 129.98, 129.70, 129.16, 128.35, 127.79, 127.37, 125.31, 114.70; HRMS (ESI) calcd. for C<sub>35</sub>H<sub>25</sub>NCl (M<sup>+</sup>) 509.1779; found 509.1796. Yield: 52%.

**1-(5-ester-2-aminophenyl)-2, 4,5-triphenylpyridinium perchlorate (1k):** <sup>1</sup>H NMR (500 MHz, DMSO) δ 9.20 (s, 1H), 8.37 (s, 1H), 8.01 (d, *J* = 1.6 Hz, 1H), 7.70 (dd, *J* = 8.7, 1.9 Hz, 1H), 7.56 (d, *J* = 7.3 Hz, 2H), 7.46 (dt, *J* = 14.4, 9.8 Hz, 1H), 7.38 – 7.26 (m, 2H), 6.76 (d, *J* = 8.7 Hz, 1H), 6.60 (s, 2H). <sup>13</sup>C NMR(100 MHz, CD<sub>3</sub>CN): δ=165.299, 156.550, 154.306, 148.021, 147.354, 138.551, 135.254, 133.654, 132.244, 131.410, 131.046, 130.818, 130.341, 130.273, 129.787, 129.522, 129.211, 129.029, 128.878, 128.787, 128.339, 125.078, 116.080, 115.648, 51.676; HRMS calcd for C<sub>31</sub>H<sub>25</sub>N<sub>2</sub>O<sub>2</sub> (M<sup>+</sup>) 457.1916, found 457.1928. Yield: 68%.

**1-(4-bromo-2-aminophenyl)-2, 3,4,5-tetraphenylpyridinium perchlorate (1l):** <sup>1</sup>H NMR (500 MHz, DMSO) δ 9.30 (d, *J* = 8.0 Hz, 1H), 7.67 – 7.53 (m, 1H), 7.39 – 7.23 (m, 8H), 7.19 – 7.09 (m, 6H), 7.06 – 6.93 (m, 7H), 6.86 (d, *J* = 1.8 Hz, 1H), 6.72 – 6.58 (m, 1H), 6.05 (d, *J* = 40.3 Hz, 2H). <sup>13</sup>C NMR(100 MHz, DMSO): δ=157.058,154.435, 145.814, 144.275, 142.357, 140.075, 134.920, 134.556, 133.866, 130.947, 130.318, 130.091, 129.818, 129.666, 129.257, 128.718, 128.423, 127.869, 127.596, 127.452, 127.285, 125.974, 123.904, 117.877, 117.649; HRMS calcd for C<sub>35</sub>H<sub>26</sub>N<sub>2</sub>Br (M<sup>+</sup>) 553.1279, found 553.1226. Yield: 55%.

**1-(2-aminonaphthyl)-2,4,5-triphenylpyridinium perchlorate (1n):** <sup>1</sup>H NMR (500 MHz, DMSO) δ 9.26 (s, 1H), 8.44 (s, 1H), 7.99 (s, 1H), 7.62 (dd, *J* = 14.5, 7.7 Hz, 4H), 7.56 – 7.49 (m, 1H), 7.47 (s, 4H), 7.43 (d, *J* = 4.3 Hz, 3H), 7.38 (t, *J* = 9.4 Hz, 6H), 7.18 (t, *J* = 7.4 Hz, 1H), 7.09 (s, 1H), 5.82 (d, *J* = 63.8 Hz, 2H); <sup>13</sup>C NMR(100 MHz, CD<sub>3</sub>CN): δ=156.60, 154.22, 147.77, 140.83, 135.22, 133.60, 129.81, 129.58, 129.46, 129.40, 128.86, 128.78, 128.31, 128.05, 127.64, 125.29, 122.59, 109.32; HRMS (ESI) calcd. for C<sub>33</sub>H<sub>25</sub>N<sub>2</sub> (M<sup>+</sup>) 449.2012; found 449.2023. Yield: 82%.

**1-(2-aminonaphthyl)-2,3,4,5-tetraphenylpyridinium perchlorate (1o):** <sup>1</sup>H NMR (400 MHz, DMSO) δ 9.39 (s, 1H), 7.98 (d, *J* = 21.9 Hz, 1H), 7.62 (d, *J* = 8.2 Hz, 1H), 7.55 (d, *J* = 8.4 Hz, 1H), 7.43 (d, *J* = 7.4 Hz, 1H), 7.35 (t, *J* = 8.2 Hz, 5H), 7.28 (d, *J* = 3.7 Hz, 2H), 7.17 (d, *J* = 3.1 Hz, 4H), 7.11 – 6.88 (m, 11H), 5.93 (s, 2H); <sup>13</sup>C NMR(100 MHz, CD<sub>3</sub>CN): δ=157.16, 154.42, 148.24, 146.04, 142.57, 140.57, 139.53, 134.91, 134.46, 133.73, 131.23, 130.25, 129.75, 129.21, 128.35, 127.81, 127.38, 125.32, 124.59, 122.82; HRMS (ESI) calcd. for C<sub>39</sub>H<sub>29</sub>N<sub>2</sub> (M<sup>+</sup>) 525.2325; found 525.2326. Yield: 82%.

**1-(2-aminopyridyl)-2,3,4,5-tetraphenylpyridinium perchlorate (1p):** <sup>1</sup>H NMR (500 MHz, DMSO) δ 9.37 (s, 1H), 8.31 (s, 1H), 7.92 (d, *J* = 5.7 Hz, 1H), 7.40 – 7.21 (m, 6H), 7.14 (t, *J* = 7.4 Hz, 5H), 7.09 – 6.92 (m, 6H), 6.75 (s, 2H), 6.55 (d, *J* = 5.7 Hz, 1H). <sup>13</sup>C NMR(100 MHz, DMSO): δ= 138.87, 136.37, 131.83, 129.92, 129.47, 127.79, 123.97, 121.77, 116.51, 116.15, 115.49, 112.54, 111.94, 111.74, 111.49, 111.36, 110.93, 110.44, 110.13, 109.58, 109.51, 109.32, 109.15, 109.09, 106.15, 91.91; HRMS calcd for C<sub>34</sub>H<sub>26</sub>N<sub>3</sub> (M<sup>+</sup>) 476.2127, found 476.2109. Yield: 70%.

**General Procedure for the Synthesis of pyrido [1,2-*a*]benzimidazole derivatives (2a,2b,2c,2d,2e,2f,2g,2h,2i,2j,2k,2l,2m,2n,2o and 2p)<sup>2</sup>:**

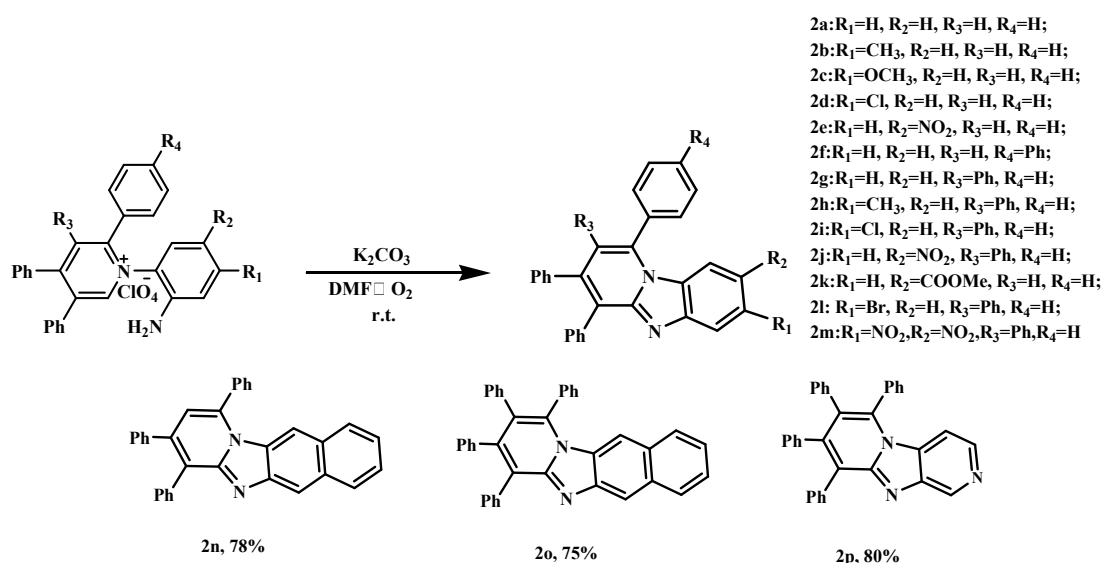

A solution of 2,4,5-triphenylpyridinium perchlorate **1a** (0.20g, 0.40mmol) was dissolved in 5mL DMF and equivalent of K<sub>2</sub>CO<sub>3</sub> was added. The solution was stirred at room temperature for 12hours under the presence of air. Then, the solvent was diluted with CH<sub>2</sub>Cl<sub>2</sub> (50ml), and washed with water (3×20ml). The organic layer was separated, dried and concentrated in vacuo. The mixture was purified by flash column chromatography with CH<sub>2</sub>Cl<sub>2</sub>, to afford the corresponding product **2a**. All the targeted compounds synthesized and purified with the same procedure as **2a**. (using dichloromethane as the eluent in column chromatography for all synthesized compounds)

**1,3,4-triphenyl-pyrido[1,2-*a*]benzimidazole (2a):** <sup>1</sup>H NMR(400 MHz, CDCl<sub>3</sub>) δ: 7.93 (d, *J*=8 Hz, 1H), 7.54-7.74 (m, 5H), 7.47 (m, 2H), 7.30-7.42 (m, 4H), 7.23 (s, 5H), 6.97 (m, 1H), 6.85 (s, 1H), 6.64 (d, *J*=8 Hz, 1H). <sup>13</sup>C NMR (100 MHz, CDCl<sub>3</sub>) δ: 140.2, 139.8, 131.5, 130.2, 129.9, 129.3, 128.3, 128.2, 127.9, 127.6, 125.0, 120.5, 115.6, 114.7. HRMS (ESI) *m/z* calcd for C<sub>29</sub>H<sub>21</sub>N<sub>2</sub> [M+H]<sup>+</sup>, 397.1750; found, 397.1712. Yield: 65%.

**7-methyl-1,3,4-triphenyl-pyrido[1,2-*a*]benzimidazole (2b):** <sup>1</sup>H NMR (400 MHz, CDCl<sub>3</sub>) δ 7.71 (s, 1H), 7.69 – 7.55 (m, 6H), 7.46 (dd, *J* = 8.0, 1.4 Hz, 3H), 7.36 (t, *J* = 1.8 Hz, 1H), 7.34 (s, 1H), 7.31 (dd, *J* = 3.9, 2.3 Hz, 2H), 7.29 (t, *J* = 3.1 Hz, 1H), 7.27 – 7.24 (m, 2H), 7.24 – 7.16 (m, 6H), 6.86 – 6.76 (m, 2H), 6.51 (d, *J* = 8.6 Hz, 1H), 2.45 (s, 3H); <sup>13</sup>C NMR (100 MHz, CDCl<sub>3</sub>) δ: 149.93, 146.04, 139.81, 139.45, 135.59, 134.88, 134.59, 134.54, 131.37, 130.01, 129.77, 129.20, 128.15, 128.09, 127.65, 127.60, 127.35, 126.82, 122.17, 119.74, 115.19, 114.35, 114.00, 21.68; HRMS (ESI) *m/z* calcd for C<sub>30</sub>H<sub>23</sub>N<sub>2</sub> [M+H]<sup>+</sup>, 411.1783; found, 411.1863. Yield: 62%.

**7-methoxyl-1,3,4-triphenyl-pyrido[1,2-*a*]benzimidazole (2c):** <sup>1</sup>H NMR (400 MHz, CDCl<sub>3</sub>) δ

7.72 – 7.55 (m, 5H), 7.50 – 7.40 (m, 2H), 7.36 (dd,  $J = 5.6, 2.2$  Hz, 2H), 7.31 (ddd,  $J = 10.0, 6.4, 4.0$  Hz, 2H), 7.26 (s, 2H), 7.21 (d,  $J = 7.3$  Hz, 5H), 6.84 (s, 1H), 6.61 (dd,  $J = 9.2, 2.5$  Hz, 1H), 6.51 (d,  $J = 9.2$  Hz, 1H), 3.83 (s, 3H);  $^{13}\text{C}$  NMR (100 MHz,  $\text{CDCl}_3$ )  $\delta$ : 152.4, 150.7, 146.3, 140.2, 139.3, 131.2, 130.2, 129.7, 129.3, 129.1, 128.4, 128.1, 127.6, 115.1, 55.7; MS  $m/z$  (%): 427.2 ( $[\text{M}+\text{H}]^+$ , 100). HRMS (ESI)  $m/z$  calcd for  $\text{C}_{30}\text{H}_{23}\text{N}_2\text{O}$   $[\text{M}+\text{H}]^+$ , 427.1732; found, 427.1824. Yield: 66%.

**7-chloro-1,3,4-triphenyl-pyrido[1,2-*a*]benzimidazole (2d):**  $^1\text{H}$  NMR (400 MHz,  $\text{CDCl}_3$ )  $\delta$  7.72 (s, 1H), 7.68 – 7.55 (m, 6H), 7.50 – 7.40 (m, 3H), 7.31 (ddd,  $J = 10.7, 10.1, 5.2$  Hz, 4H), 7.26 (s, 1H), 7.21 (d,  $J = 8.6$  Hz, 5H), 6.89 – 6.74 (m, 2H), 6.51 (d,  $J = 8.6$  Hz, 1H);  $^{13}\text{C}$  NMR (100 MHz,  $\text{CDCl}_3$ )  $\delta$ : 151.1, 147.3, 144.2, 138.2, 137.9, 133.1, 129.8, 129.3, 127.6, 126.7, 126.3, 124.7, 124.0, 122.1, 118.8, 116.0; HRMS (ESI)  $m/z$  calcd for  $\text{C}_{29}\text{H}_{20}\text{ClN}_2$   $[\text{M}+\text{H}]^+$ , 431.1237; found, 431.1321. Yield: 72%.

**8-nitro-1,3,4-triphenyl-pyrido[1,2-*a*]benzimidazole (2e):**  $^1\text{H}$  NMR (400 MHz,  $\text{CDCl}_3$ )  $\delta$  8.29 (dd,  $J = 9.1, 2.2$  Hz, 1H), 7.93 (d,  $J = 9.1$  Hz, 1H), 7.81 – 7.75 (m, 1H), 7.75 – 7.63 (m, 4H), 7.59 (d,  $J = 2.1$  Hz, 1H), 7.46 (dd,  $J = 7.9, 1.6$  Hz, 2H), 7.42 – 7.31 (m, 3H), 7.31 – 7.19 (m, 6H), 7.06 (s, 1H);  $^{13}\text{C}$  NMR (100 MHz,  $\text{CDCl}_3$ )  $\delta$ : 153.2, 149.4, 143.2, 140.8, 140.3, 138.5, 134.4, 132.9, 131.2, 131.1, 130.9, 129.9, 129.6, 129.4, 129.2, 128.7, 128.4, 128.3, 128.2, 128.0, 127.8, 127.5, 120.8, 119.7, 117.0, 112.0; HRMS (ESI)  $m/z$  calcd for  $\text{C}_{29}\text{H}_{21}\text{N}_2$   $[\text{M}+\text{H}]^+$ , 442.1556; found, 441.1549. Yield: 86%.

**1-biphenyl-3,4-diphenyl-pyrido[1,2-*a*]benzimidazole (2f):**  $^1\text{H}$  NMR (400 MHz,  $\text{CDCl}_3$ )  $\delta$  7.94 (d,  $J = 8.2$  Hz, 1H), 7.86 (d,  $J = 8.0$  Hz, 2H), 7.74 (t,  $J = 8.4$  Hz, 4H), 7.53 (t,  $J = 7.6$  Hz, 2H), 7.50 – 7.26 (m, 7H), 7.23 (s, 5H), 7.00 (t,  $J = 7.8$  Hz, 1H), 6.90 (s, 1H), 6.85 (d,  $J = 8.5$  Hz, 1H);  $^{13}\text{C}$  NMR (100 MHz,  $\text{CDCl}_3$ )  $\delta$ : 143.78, 142.93, 140.30, 140.04, 139.40, 131.32, 129.75, 129.58, 129.07, 128.19, 128.12, 127.68, 127.45, 127.23, 120.49, 114.64; HRMS (ESI)  $m/z$  calcd for  $\text{C}_{35}\text{H}_{25}\text{N}_2$   $[\text{M}+\text{H}]^+$ , 473.1939; found, 473.2029. Yield: 63%.

**1,2,3,4-tetraphenyl-pyrido[1,2-*a*]benzimidazole (2g):**  $^1\text{H}$  NMR (400 MHz,  $\text{CDCl}_3$ )  $\delta$  7.96 (d,  $J = 8.1$  Hz, 2H), 7.38 (dd,  $J = 22.3, 7.4$  Hz, 9H), 7.26 (dt,  $J = 14.0, 7.2$  Hz, 4H), 6.90 (d,  $J = 18.1$  Hz, 10H), 6.11 (d,  $J = 8.5$  Hz, 1H);  $^{13}\text{C}$  NMR (100 MHz,  $\text{CDCl}_3$ )  $\delta$ : 133.93, 131.69, 131.11, 130.78, 130.41, 128.92, 127.91, 127.05, 120.68, 119.62; HRMS (ESI)  $m/z$  calcd for  $\text{C}_{35}\text{H}_{25}\text{N}_2$   $[\text{M}+\text{H}]^+$ , 473.1939; found, 473.2014. Yield: 60%.

**7-methyl-1,2,3,4-tetraphenyl-pyrido[1,2-*a*]benzimidazole (2h):**  $^1\text{H}$  NMR (500 MHz,  $\text{CDCl}_3$ )  $\delta$  7.69 (s, 1H), 7.50 – 7.28 (m, 7H), 7.28 – 7.21 (m, 3H), 7.18 (t,  $J = 7.3$  Hz, 1H), 6.94 – 6.76 (m, 9H), 6.70 (d,  $J = 10.0$  Hz, 1H), 5.95 (d,  $J = 8.7$  Hz, 1H), 2.40 (s, 3H);  $^{13}\text{C}$  NMR (100 MHz,  $\text{CDCl}_3$ )  $\delta$ : 147.91, 145.00, 140.73, 137.17, 136.53, 135.80, 135.06, 133.68, 132.95, 130.70, 130.14, 129.82, 129.37, 128.18, 127.81, 127.18, 127.15, 126.75, 126.21, 125.95, 125.19, 125.10, 124.65, 121.10, 118.62, 113.12, 108.79, 20.66; HRMS (ESI)  $m/z$  calcd for  $\text{C}_{36}\text{H}_{27}\text{N}_2$   $[\text{M}+\text{H}]^+$ , 487.2096; found, 487.2189. Yield: 65%.

**7-chloro-1,2,3,4-tetraphenyl-pyrido[1,2-*a*]benzimidazole (2i):**  $^1\text{H}$  NMR (400 MHz,  $\text{CDCl}_3$ )  $\delta$  7.91 (d,  $J = 1.7$  Hz, 1H), 7.49 – 7.33 (m, 7H), 7.25 (tt,  $J = 14.3, 7.1$  Hz, 4H), 6.96 – 6.80 (m, 11H), 5.99 (d,  $J = 9.0$  Hz, 1H);  $^{13}\text{C}$  NMR (100 MHz,  $\text{CDCl}_3$ )  $\delta$ : 142.94, 131.60, 131.07, 130.73, 130.28, 129.55, 129.08, 127.92, 127.12, 127.10, 126.47, 126.37, 120.93, 119.45, 115.49; HRMS (ESI)  $m/z$  calcd for  $\text{C}_{35}\text{H}_{24}\text{ClN}_2$   $[\text{M}+\text{H}]^+$ , 507.1550; found, 507.1631. Yield: 70%.

**8-nitro-1,2,3,4-tetraphenyl-pyrido[1,2-*a*]benzimidazole (2j):**  $^1\text{H}$  NMR (400 MHz,  $\text{CDCl}_3$ )  $\delta$  8.23 (dd,  $J = 9.1, 1.9$  Hz, 1H), 7.88 (d,  $J = 9.1$  Hz, 1H), 7.53 (dt,  $J = 19.5, 7.0$  Hz, 3H), 7.40 (d,  $J$



= 7.7 Hz, 4H), 7.34 – 7.10 (m, 4H), 7.02 (d,  $J = 1.2$  Hz, 1H), 6.95 (s, 8H), 6.89 (d,  $J = 2.6$  Hz, 2H);  $^{13}\text{C}$  NMR (100 MHz,  $\text{CDCl}_3$ )  $\delta$ : 152.26, 149.48, 144.97, 131.33, 130.91, 130.46, 130.17, 129.63, 129.59, 127.89, 127.68, 127.21, 127.15, 126.69, 126.61, 120.44, 119.46, 112.35; HRMS (ESI)  $m/z$  calcd for  $\text{C}_{35}\text{H}_{24}\text{N}_3\text{O}_2$   $[\text{M}+\text{H}]^+$ , 518.1790; found, 518.1881. Yield: 88%.

**8-ester-1,3,4-tetraphenyl-pyrido[1,2-*a*]benzimidazole (2k):**  $^1\text{H}$  NMR (500 MHz,  $\text{CDCl}_3$ )  $\delta$  8.06 (dd,  $J = 8.7, 1.5$  Hz, 1H), 7.90 (d,  $J = 8.7$  Hz, 1H), 7.76 – 7.63 (m, 5H), 7.50 – 7.43 (m, 2H), 7.43 – 7.29 (m, 4H), 7.25 (d,  $J = 6.3$  Hz, 5H), 6.96 (s, 1H), 3.81 (s, 3H).  $^{13}\text{C}$  NMR (100 MHz,  $\text{CDCl}_3$ )  $\delta$ : 152.006, 148.941, 141.904, 140.303, 139.103, 135.187, 133.908, 131.411, 130.602, 129.838, 129.642, 129.337, 129.078, 128.391, 128.337, 128.050, 127.846, 127.286, 126.208, 121.974, 119.636, 117.457, 116.206; HRMS (ESI)  $m/z$  calcd for  $\text{C}_{31}\text{H}_{23}\text{N}_2\text{O}_2$   $[\text{M}+\text{H}]^+$ , 455.1760; found, 455.1754. Yield: 78%.

**7-bromo-1,2,3,4-tetraphenyl-pyrido[1,2-*a*]benzimidazole (2l):**  $^1\text{H}$  NMR (500 MHz,  $\text{CDCl}_3$ )  $\delta$  8.06 (d,  $J = 1.7$  Hz, 1H), 7.54 – 7.33 (m, 8H), 7.24 (dt,  $J = 14.6, 6.0$  Hz, 4H), 7.05 – 6.77 (m, 11H), 5.94 (d,  $J = 9.0$  Hz, 1H);  $^{13}\text{C}$  NMR (100 MHz,  $\text{CDCl}_3$ )  $\delta$ : 149.44, 146.58, 142.98, 137.81, 137.66, 136.40, 135.55, 133.48, 131.58, 131.05, 130.70, 130.25, 129.98, 129.53, 129.06, 128.98, 128.90, 128.53, 128.40, 127.89, 127.51, 127.10, 127.08, 126.63, 126.45, 126.35, 123.49, 122.61, 118.43, 115.82; HRMS (ESI)  $m/z$  calcd for  $\text{C}_{35}\text{H}_{24}\text{N}_2\text{Br}$   $[\text{M}+\text{H}]^+$ , 551.1123; found, 551.1138. Yield: 67%.

**7,8-dinitro-1,3,4-tetraphenyl-pyrido[1,2-*a*]benzimidazole (2m):**  $^1\text{H}$  NMR (500 MHz,  $\text{CDCl}_3$ )  $\delta$  8.26 (d,  $J = 23.2$  Hz, 1H), 7.78 – 7.70 (m, 3H), 7.65 (dd,  $J = 8.1, 1.3$  Hz, 2H), 7.46 – 7.35 (m, 5H), 7.31 – 7.23 (m, 7H), 7.15 (s, 1H).  $^{13}\text{C}$  NMR (100 MHz,  $\text{CDCl}_3$ )  $\delta$ : 154.72, 147.04, 144.06, 142.01, 140.07, 138.03, 134.72, 133.98, 132.31, 131.50, 131.10, 130.14, 129.60, 129.10, 128.69, 128.45, 128.42, 128.37, 127.91, 118.06, 116.35, 113.35; HRMS (ESI)  $m/z$  calcd for  $\text{C}_{29}\text{H}_{19}\text{N}_4\text{O}_4$   $[\text{M}+\text{H}]^+$ , 487.1406; found, 487.1418. Yield: 88%.

**1,3,4-triphenyl-Naphth[2,3-*d*]imidazole (2n):**  $^1\text{H}$  NMR (400 MHz,  $\text{CDCl}_3$ )  $\delta$  8.38 (s, 1H), 7.96 (d,  $J = 8.3$  Hz, 1H), 7.69 (dt,  $J = 13.3, 6.8$  Hz, 5H), 7.57 (d,  $J = 8.2$  Hz, 1H), 7.51 (d,  $J = 7.1$  Hz, 2H), 7.44 – 7.14 (m, 10H), 7.06 (s, 1H), 6.85 (s, 1H);  $^{13}\text{C}$  NMR (100 MHz,  $\text{CDCl}_3$ )  $\delta$ : 152.78, 144.89, 142.16, 140.79, 139.21, 131.35, 130.25, 129.68, 129.22, 129.20, 128.34, 128.25, 128.16, 127.82, 127.65, 124.53, 116.06, 114.77, 111.83; HRMS (ESI)  $m/z$  calcd for  $\text{C}_{33}\text{H}_{23}\text{N}_2$   $[\text{M}+\text{H}]^+$ , 447.1783; found, 447.1866. Yield: 78%.

**1,2,3,4-tetrahenyl-Naphth[2,3-*d*]imidazole (2o):**  $^1\text{H}$  NMR (400 MHz,  $\text{CDCl}_3$ )  $\delta$  8.37 (s, 1H), 7.94 (d,  $J = 8.5$  Hz, 1H), 7.72 – 7.09 (m, 15H), 7.09 – 6.62 (m, 11H), 6.49 (s, 1H);  $^{13}\text{C}$  NMR (100 MHz,  $\text{CDCl}_3$ )  $\delta$ : 171.16, 138.91, 131.75, 131.13, 130.65, 130.42, 129.03, 128.46, 127.12, 127.09, 112.32; HRMS (ESI)  $m/z$  calcd for  $\text{C}_{39}\text{H}_{27}\text{N}_2$   $[\text{M}+\text{H}]^+$ , 523.2096; found, 523.2165. Yield: 75%.

**1,2,3,4-tetrapyridyl-pyrido[1,2-*a*]benzimidazole (2p):**  $^1\text{H}$  NMR (500 MHz,  $\text{CDCl}_3$ )  $\delta$  8.42 (d,  $J = 5.8$  Hz, 1H), 7.78 (d,  $J = 5.8$  Hz, 1H), 7.50 – 7.44 (m, 3H), 7.41 (dd,  $J = 10.4, 5.8$  Hz, 4H), 7.32 – 7.21 (m, 4H), 6.99 – 6.92 (m, 5H), 6.90 (dd,  $J = 7.1, 2.5$  Hz, 2H), 6.87 (dd,  $J = 6.6, 3.0$  Hz, 2H).  $^{13}\text{C}$  NMR (100 MHz,  $\text{CDCl}_3$ )  $\delta$ : 150.760, 150.191, 144.856, 143.574, 138.584, 137.770, 137.706, 136.255, 135.519, 133.622, 131.625, 131.170, 130.747, 130.156, 129.951, 129.733, 128.810, 128.678, 128.105, 127.786, 127.368, 127.327, 126.813, 126.708, 114.510; HRMS (ESI)  $m/z$  calcd for  $\text{C}_{34}\text{H}_{24}\text{N}_3$   $[\text{M}+\text{H}]^+$ , 474.1970; found, 474.1956. Yield: 80%.

## Crystal Structure Data

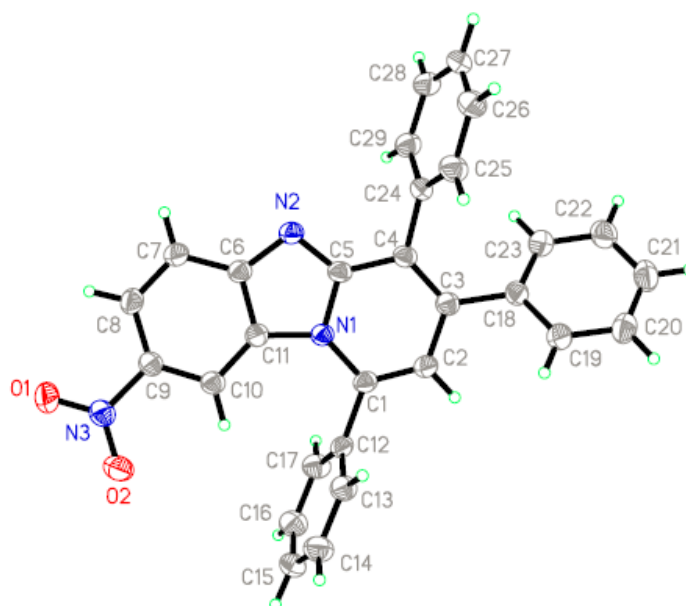

ORTEP views (ellipsoid at 30% probability level) of compound **2e**

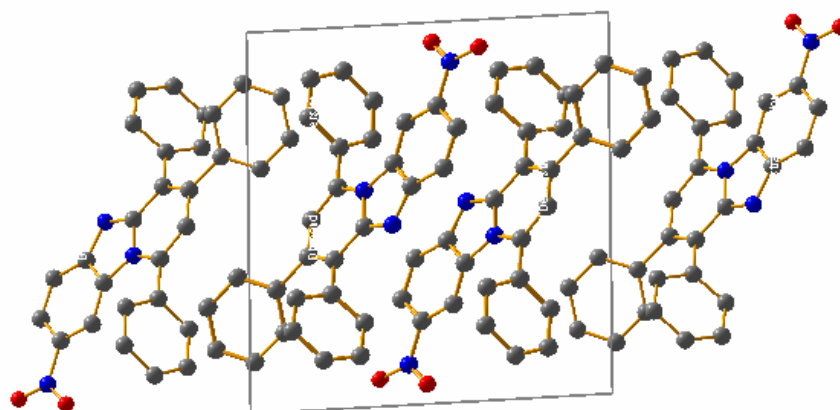

Crystal packing of **2e**

Table 1 Crystallographic data and structure refinements for **2e**

|                     |                                                                 |
|---------------------|-----------------------------------------------------------------|
| Identification code | <b>2e</b>                                                       |
| Empirical formula   | C <sub>29</sub> H <sub>19</sub> ClN <sub>3</sub> O <sub>2</sub> |
| Formula weight      | 441.47                                                          |
| Temperature (K)     | 273(2)                                                          |
| Wavelength (Å)      | 0.71073                                                         |
| Crystal system      | Triclinic                                                       |
| space group         | <i>P</i> -1                                                     |
| <i>a</i> (Å)        | 7.9933(15)                                                      |

|                                                                  |                |
|------------------------------------------------------------------|----------------|
| <i>b</i> (Å)                                                     | 11.481(2)      |
| <i>c</i> (Å)                                                     | 12.651(2)      |
| <i>α</i> (°)                                                     | 86.659(14)     |
| <i>β</i> (°)                                                     | 72.316(13)     |
| <i>γ</i> (°)                                                     | 86.751(14)     |
| Volume (Å <sup>3</sup> )                                         | 1103.3(4)      |
| <i>Z</i>                                                         | 2              |
| <i>D</i> <sub>Calc</sub> (mg/m <sup>-3</sup> )                   | 1.329          |
| <i>μ</i> (mm <sup>-1</sup> )                                     | 0.085          |
| <i>F</i> <sub>(000)</sub>                                        | 460            |
| Data / restraints / parameters                                   | 4083 / 0 / 307 |
| GOF on <i>F</i> <sup>2</sup>                                     | 0.989          |
| <i>R</i> <sub>1</sub> [ <i>I</i> > 2σ( <i>I</i> )] <sup>a</sup>  | 0.0574         |
| <i>wR</i> <sub>2</sub> [ <i>I</i> > 2σ( <i>I</i> )] <sup>a</sup> | 0.1517         |
| <i>R</i> <sub>1</sub> (all data) <sup>a</sup>                    | 0.0914         |
| <i>wR</i> <sub>2</sub> (all data) <sup>a</sup>                   | 0.1823         |

$$* R_1 = \sum |F_o| - |F_c| / \sum |F_o|; wR_2 = \{\sum [w(F_o^2 - F_c^2)^2] / \sum [w(F_o^2)]^2\}^{1/2}$$

Table 2 Selected bond lengths (Å) for compound **2e**

|            |          |             |          |
|------------|----------|-------------|----------|
| C(1)-C(2)  | 1.346(3) | C(1)-N(1)   | 1.384(3) |
| C(3)-C(4)  | 1.374(3) | C(2)-C(3)   | 1.433(3) |
| C(1)-C(12) | 1.490(3) | N(3)-O(1)   | 1.216(3) |
| C(9)-N(3)  | 1.466(3) | C(11)-N(1)  | 1.399(3) |
| C(4)-C(5)  | 1.431(3) | C(3)-C(18)  | 1.503(3) |
| C(5)-N(1)  | 1.401(3) | C(5)-N(2)   | 1.328(3) |
| C(6)-N(2)  | 1.371(3) | C(4)-C(24)  | 1.494(3) |
| C(9)-C(10) | 1.380(3) | C(10)-C(11) | 1.384(3) |
| C(8)-C(9)  | 1.392(3) | C(7)-C(8)   | 1.374(3) |
| C(6)-C(11) | 1.412(3) | C(6)-C(7)   | 1.399(3) |

Table 3 Selected angles (°) for compound **2e**

|                  |            |                  |            |
|------------------|------------|------------------|------------|
| C(2)-C(1)-N(1)   | 117.80(18) | C(1)-C(2)-C(3)   | 123.0(2)   |
| C(4)-C(3)-C(2)   | 119.1(2)   | C(3)-C(4)-C(5)   | 118.71(18) |
| N(2)-C(5)-N(1)   | 113.12(18) | N(1)-C(5)-C(4)   | 118.98(19) |
| N(2)-C(6)-C(11)  | 111.86(19) | C(7)-C(6)-C(11)  | 119.64(19) |
| C(8)-C(7)-C(6)   | 118.7(2)   | C(7)-C(8)-C(9)   | 119.8(2)   |
| C(10)-C(9)-C(8)  | 123.8(2)   | C(9)-C(10)-C(11) | 115.7(2)   |
| C(10)-C(11)-C(6) | 122.2(2)   | N(1)-C(11)-C(6)  | 104.61(17) |
| C(1)-N(1)-C(5)   | 122.24(17) | C(5)-N(2)-C(6)   | 104.60(17) |
| C(11)-N(1)-C(5)  | 105.75(17) | O(1)-N(3)-O(2)   | 122.7(2)   |

**Spectrum Chart**  
Compound 1b:

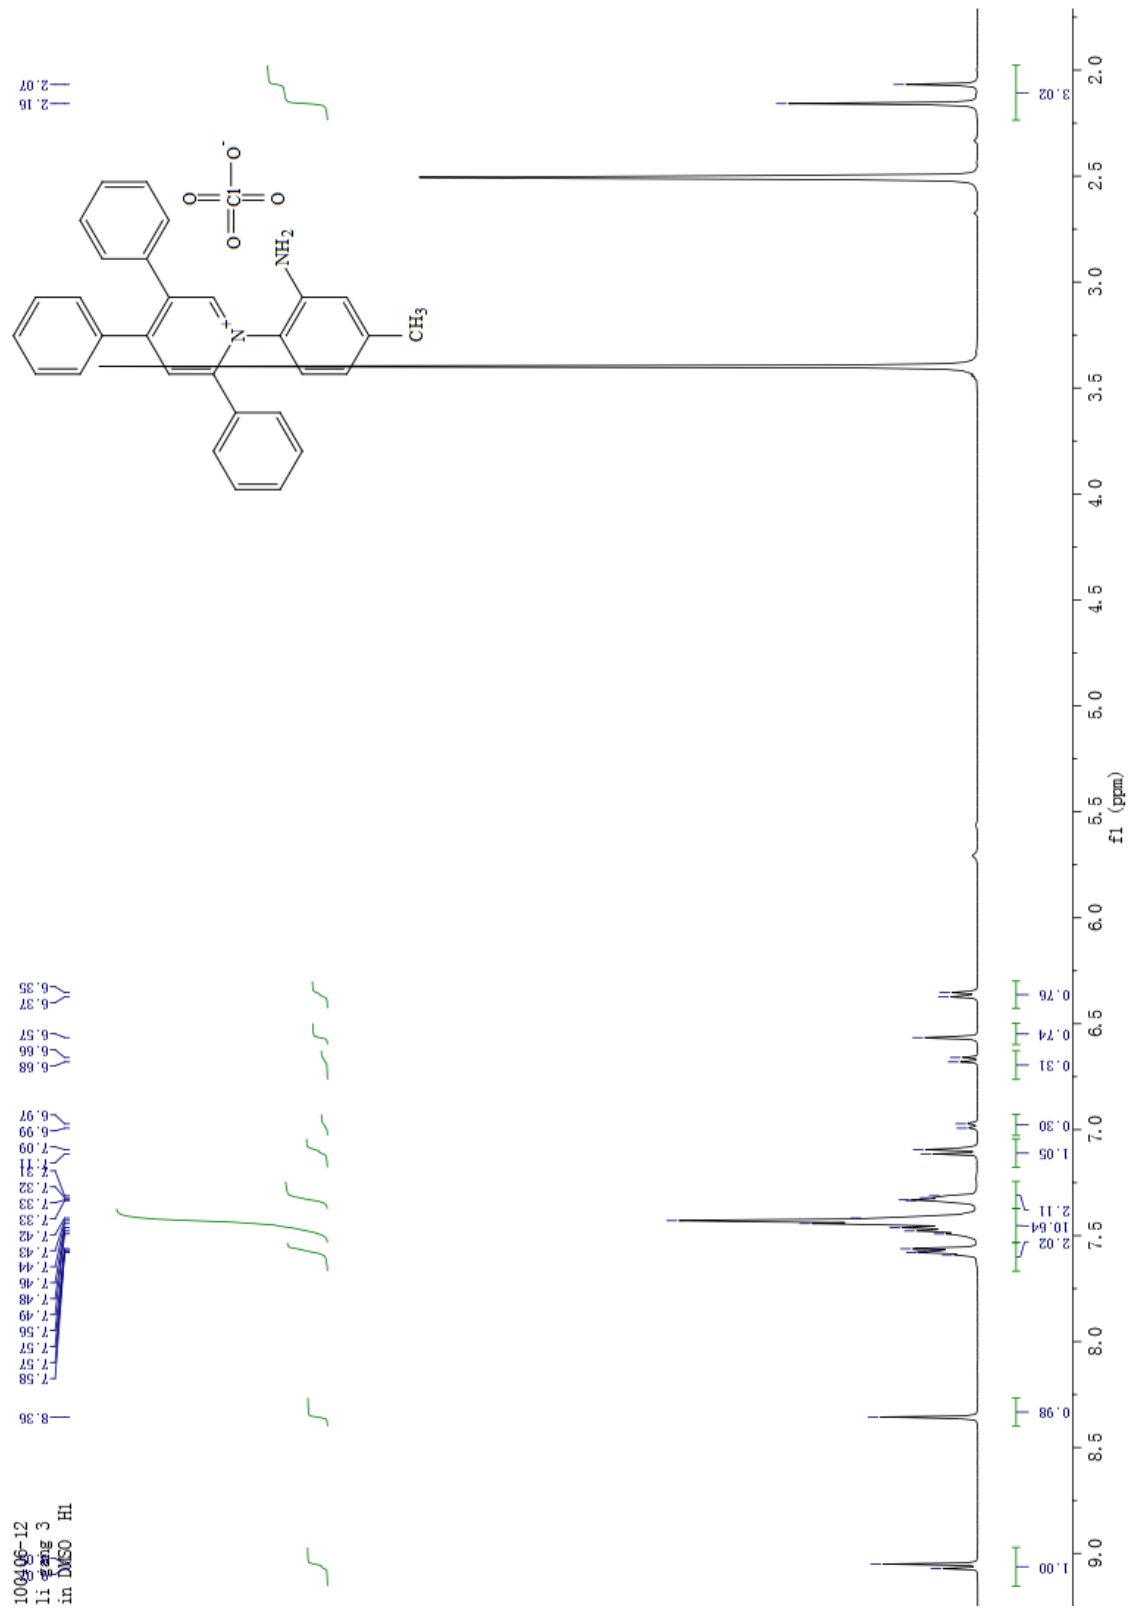

Compound 1b:

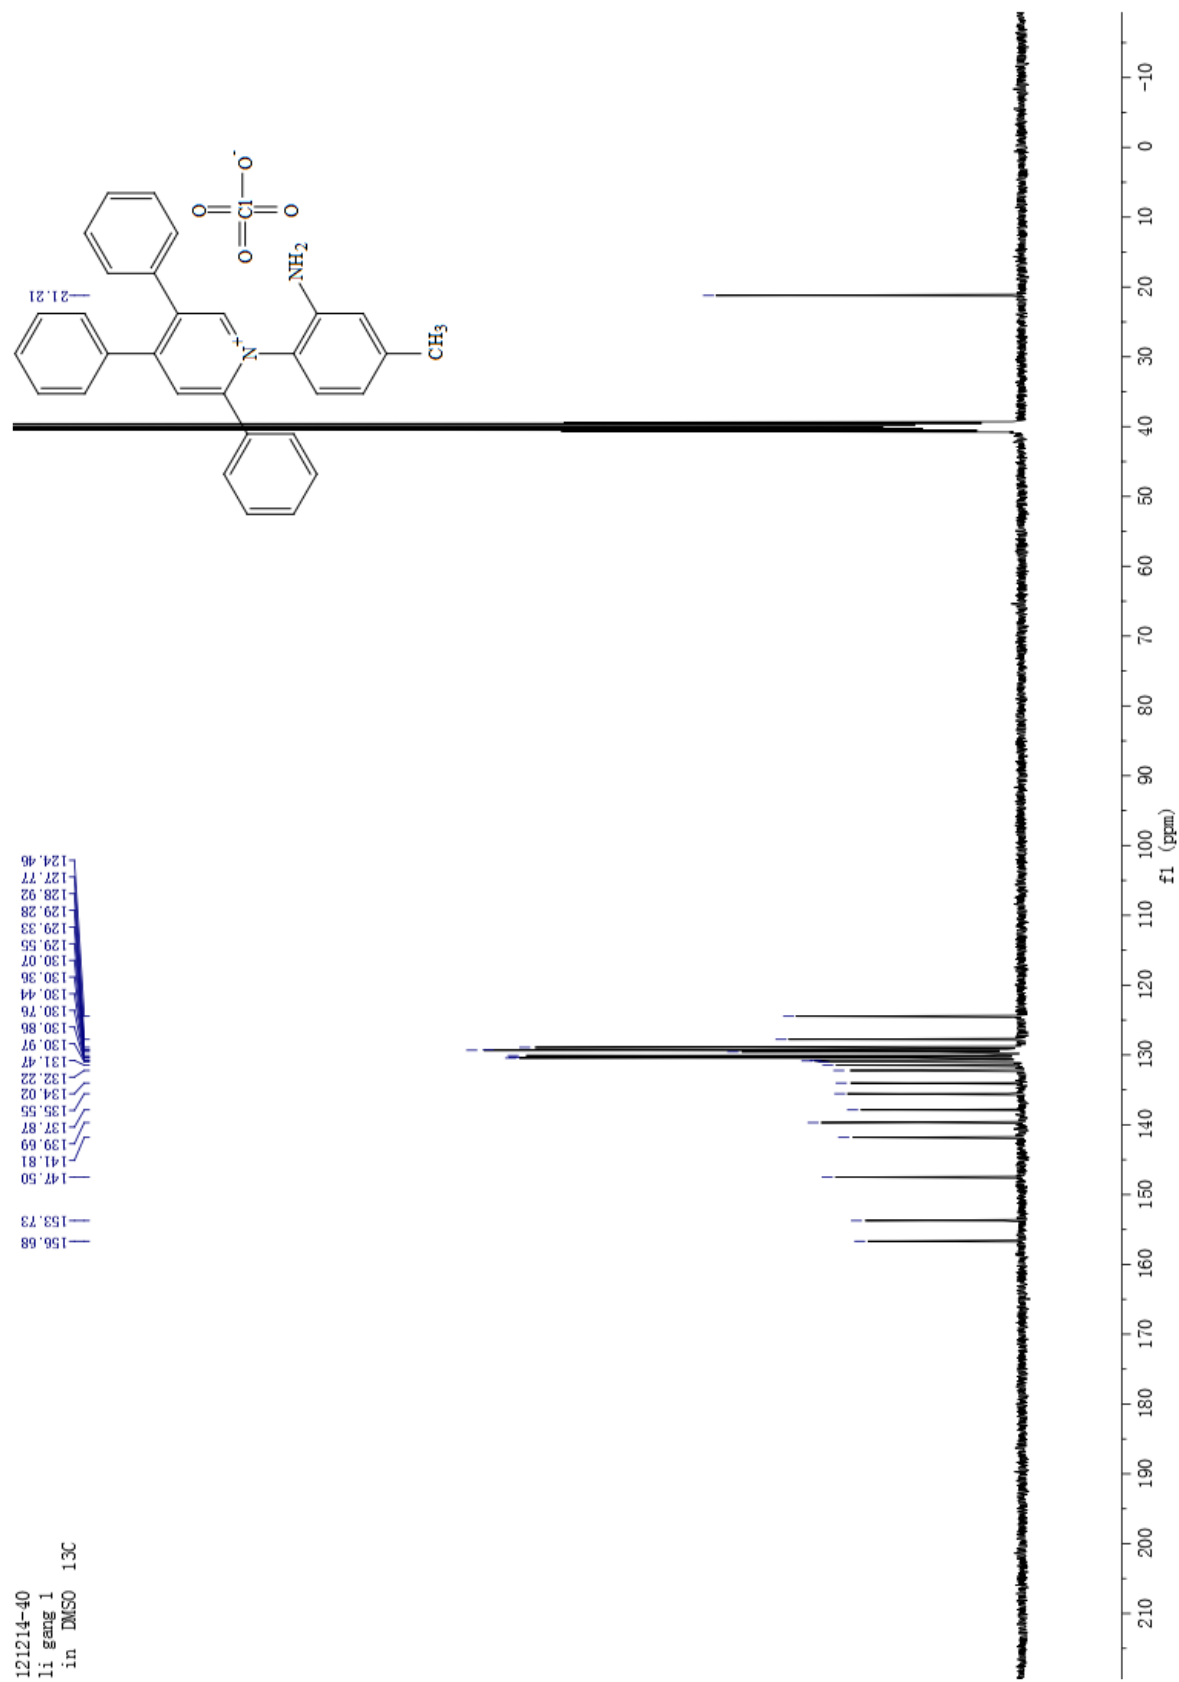

Compound 1c:

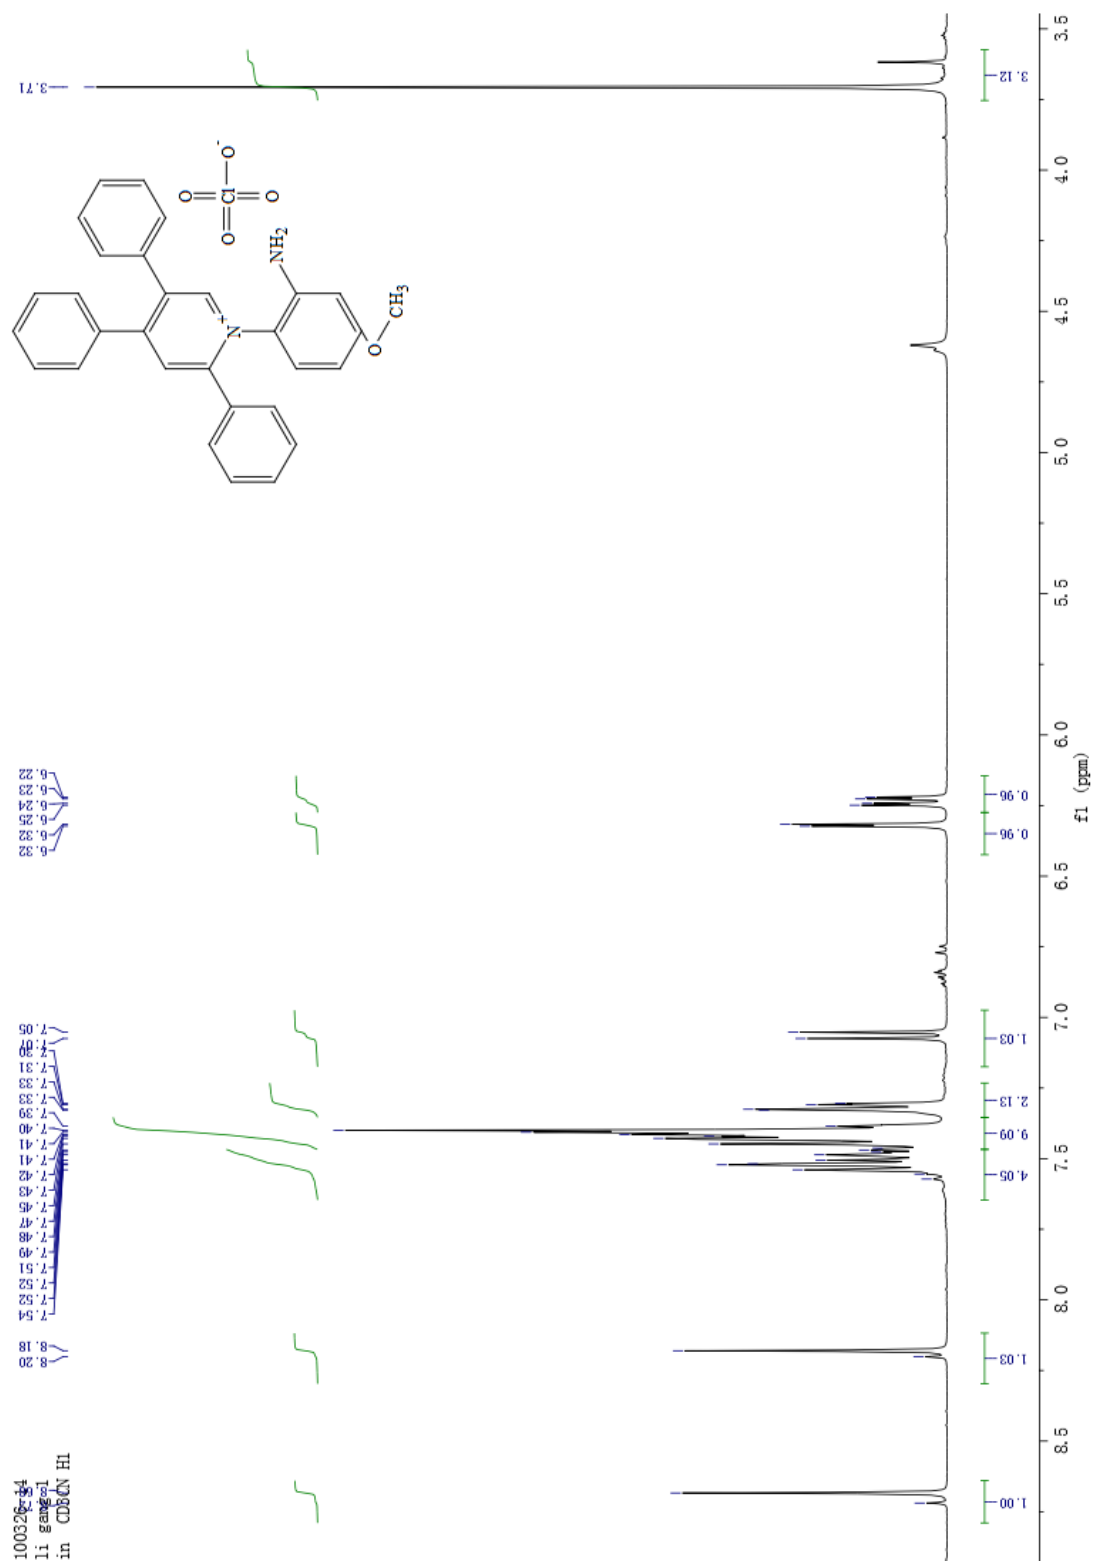

Compound 1c:

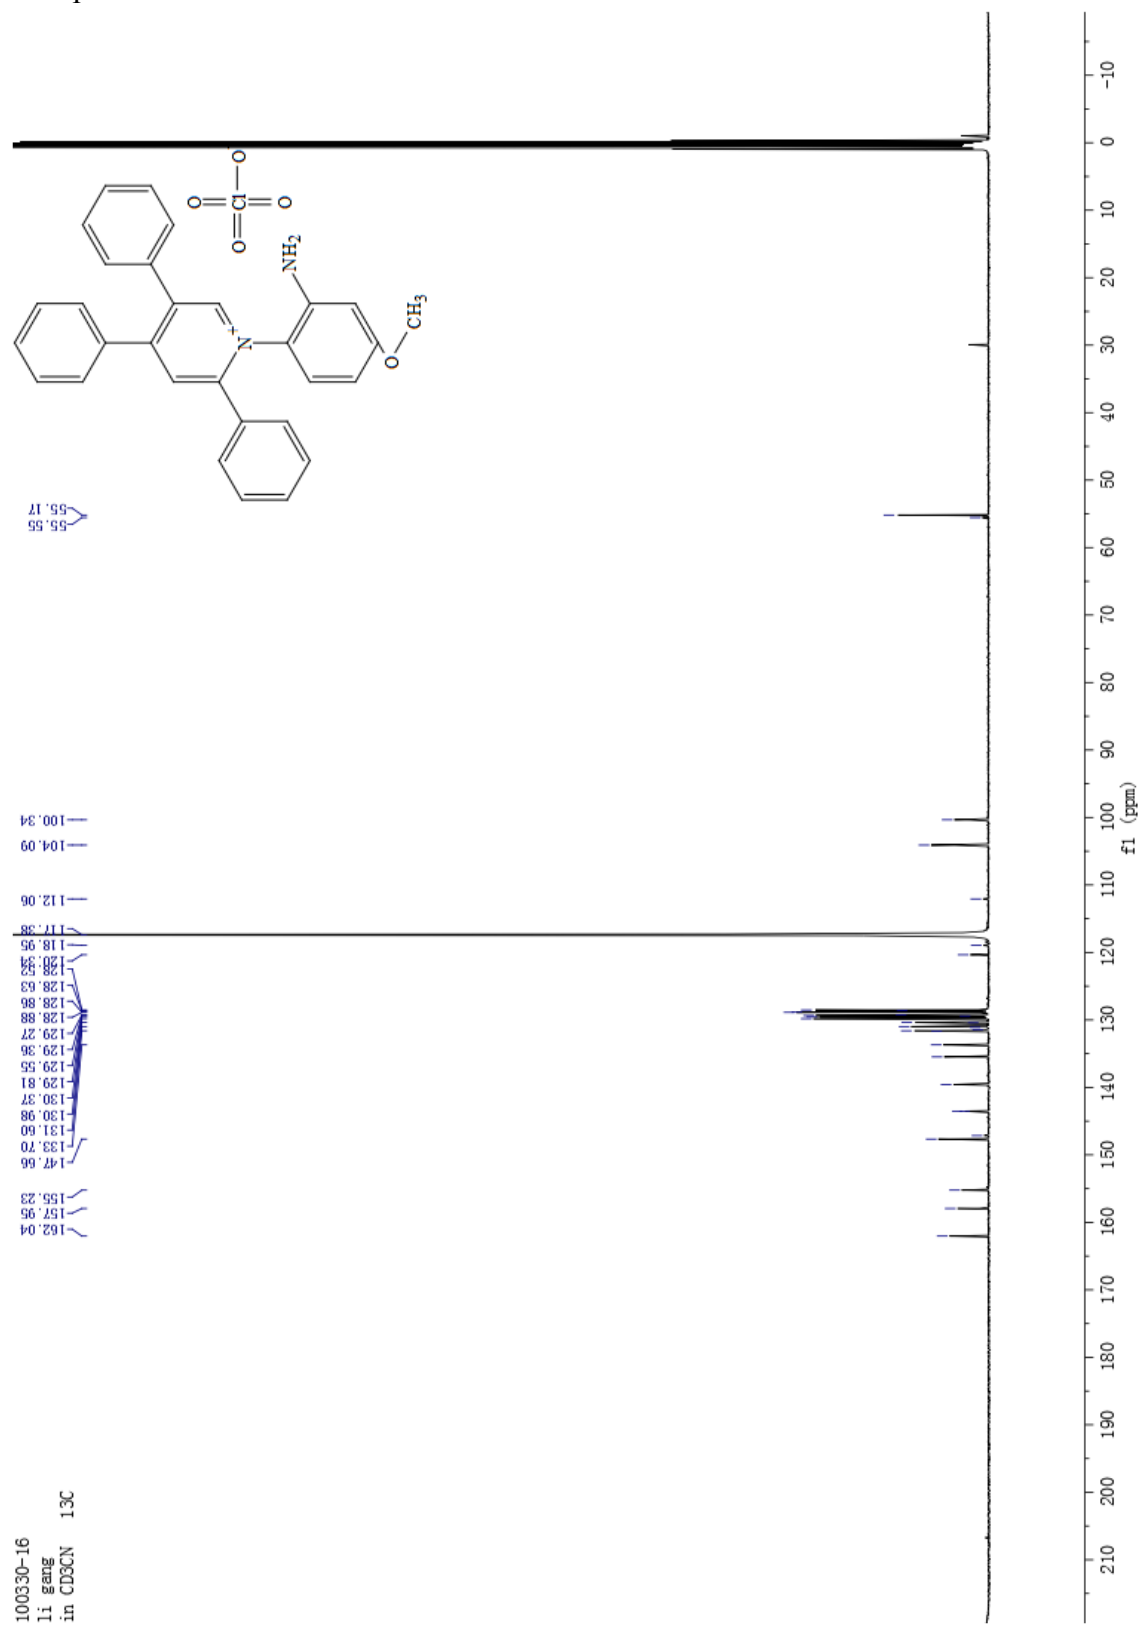

Compound 1d:

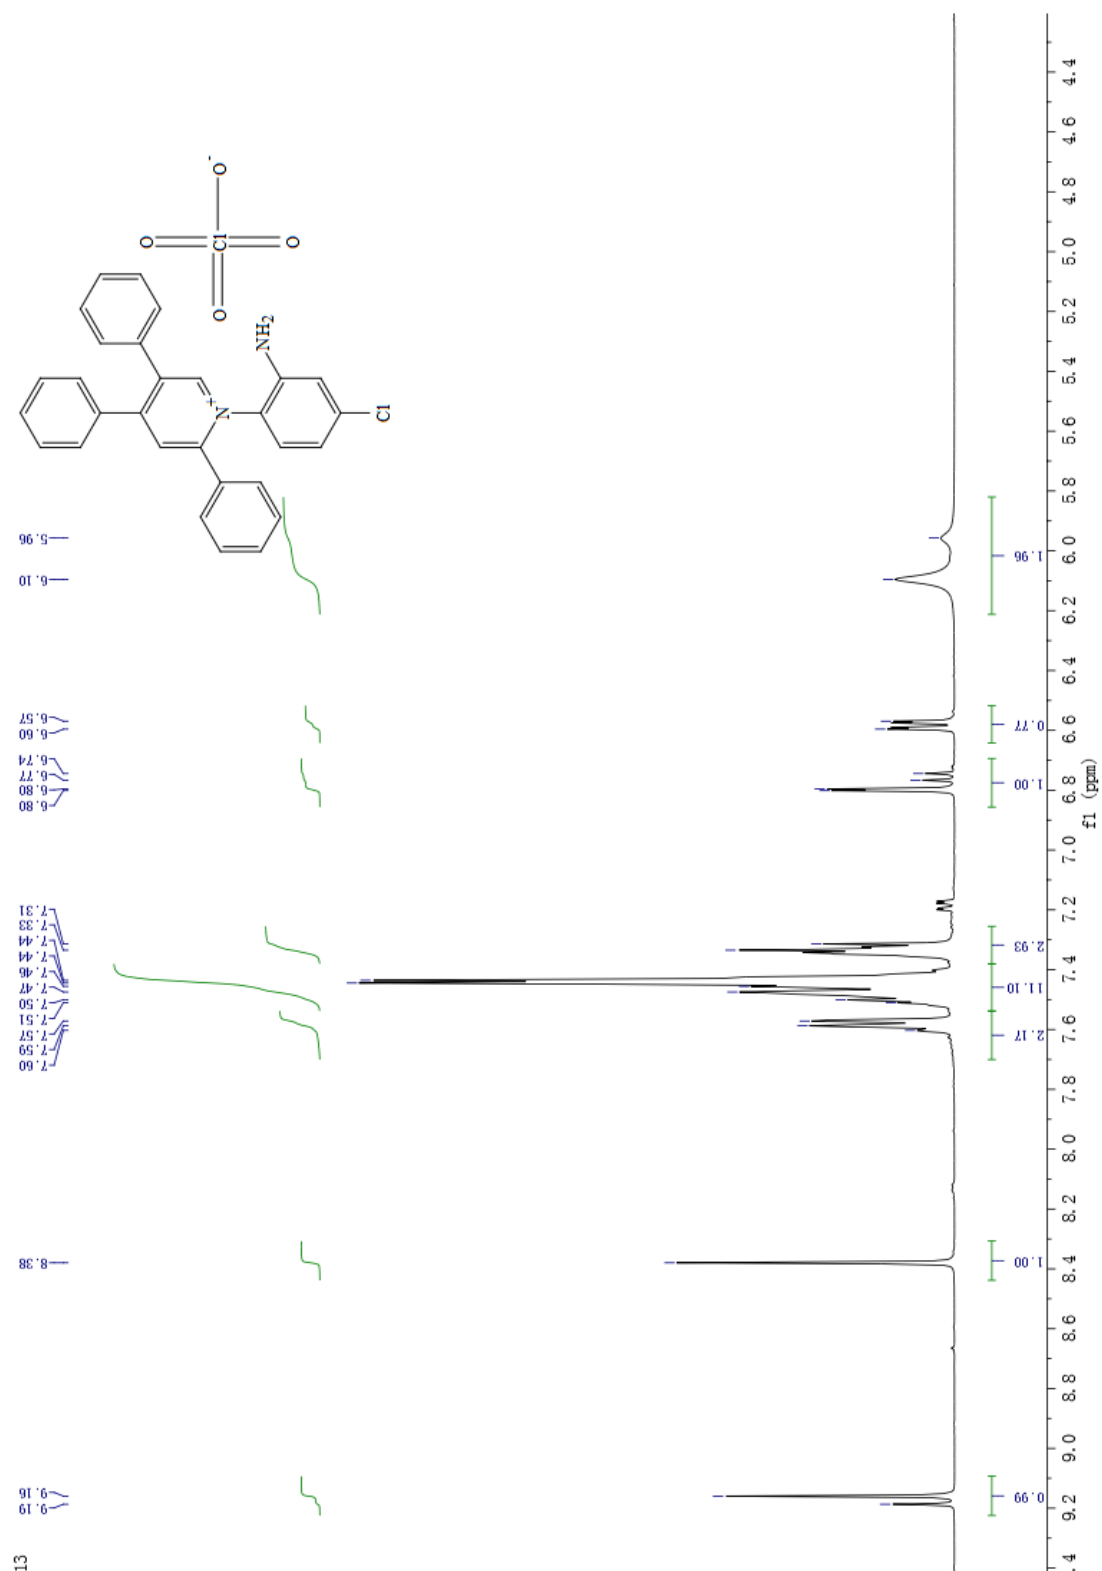



Compound 1d:

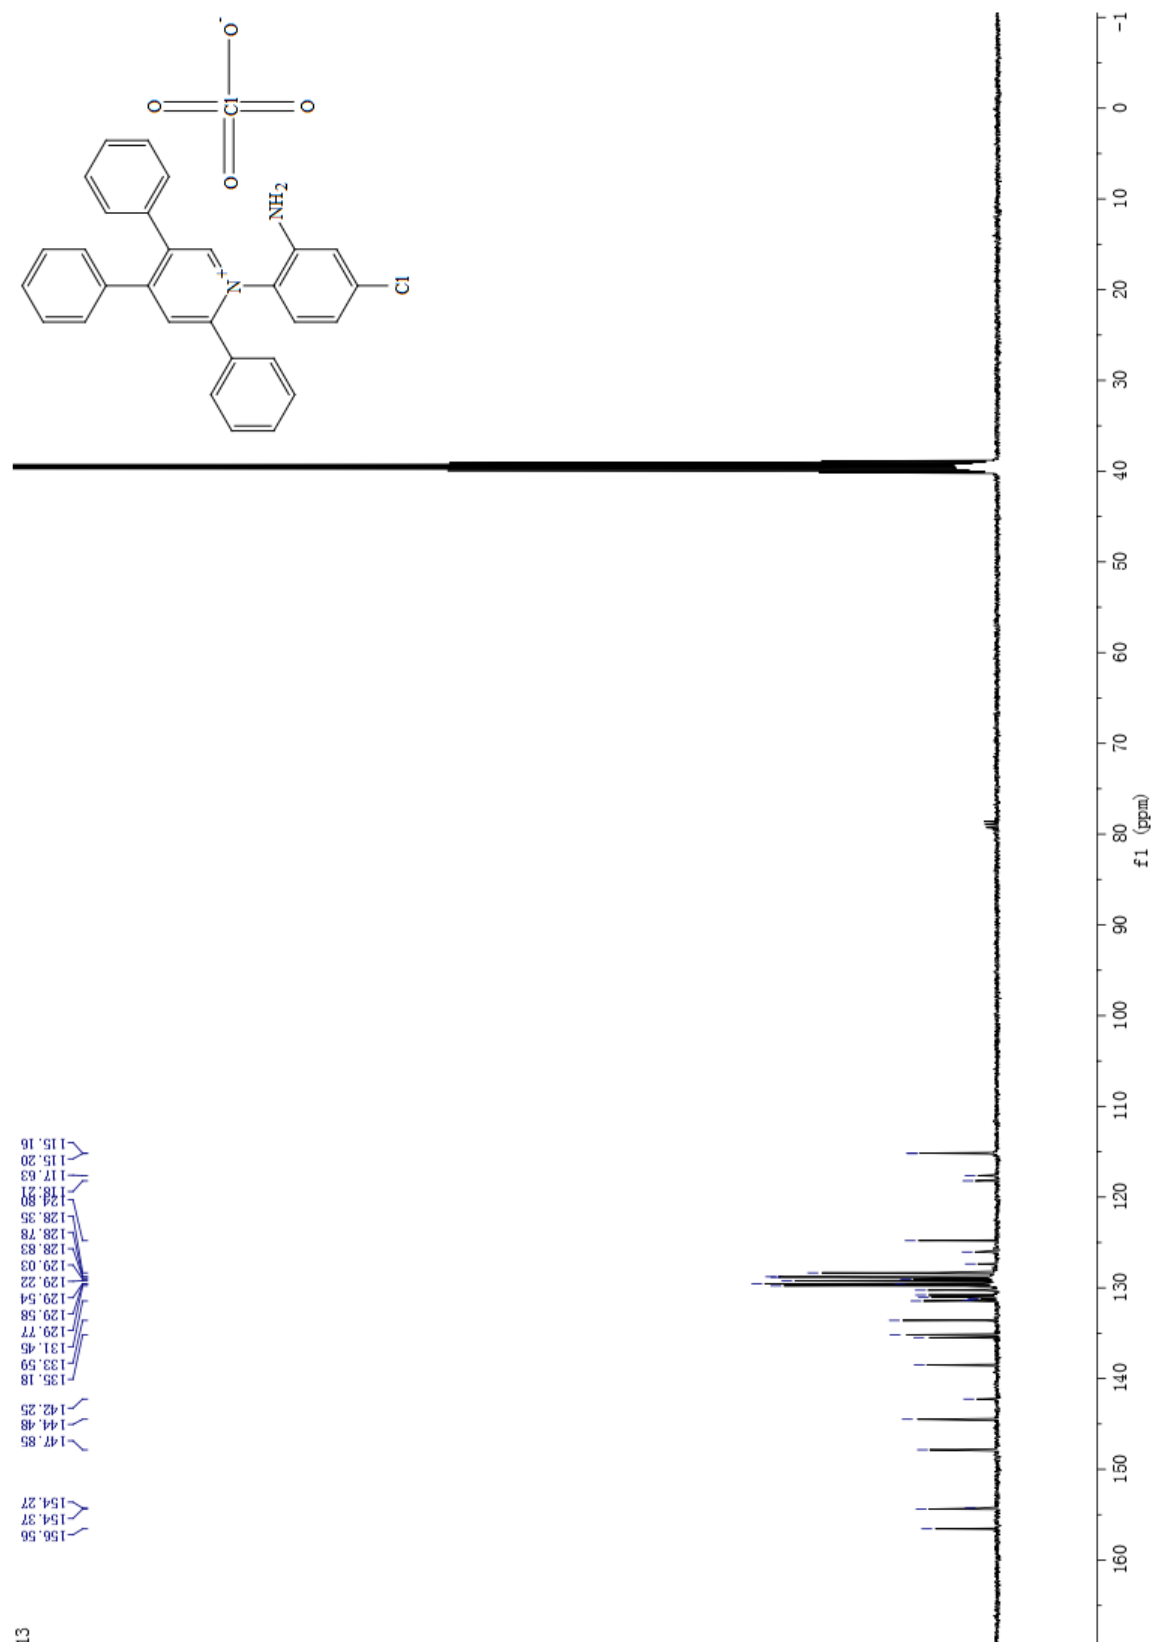

13



Compound 1e:

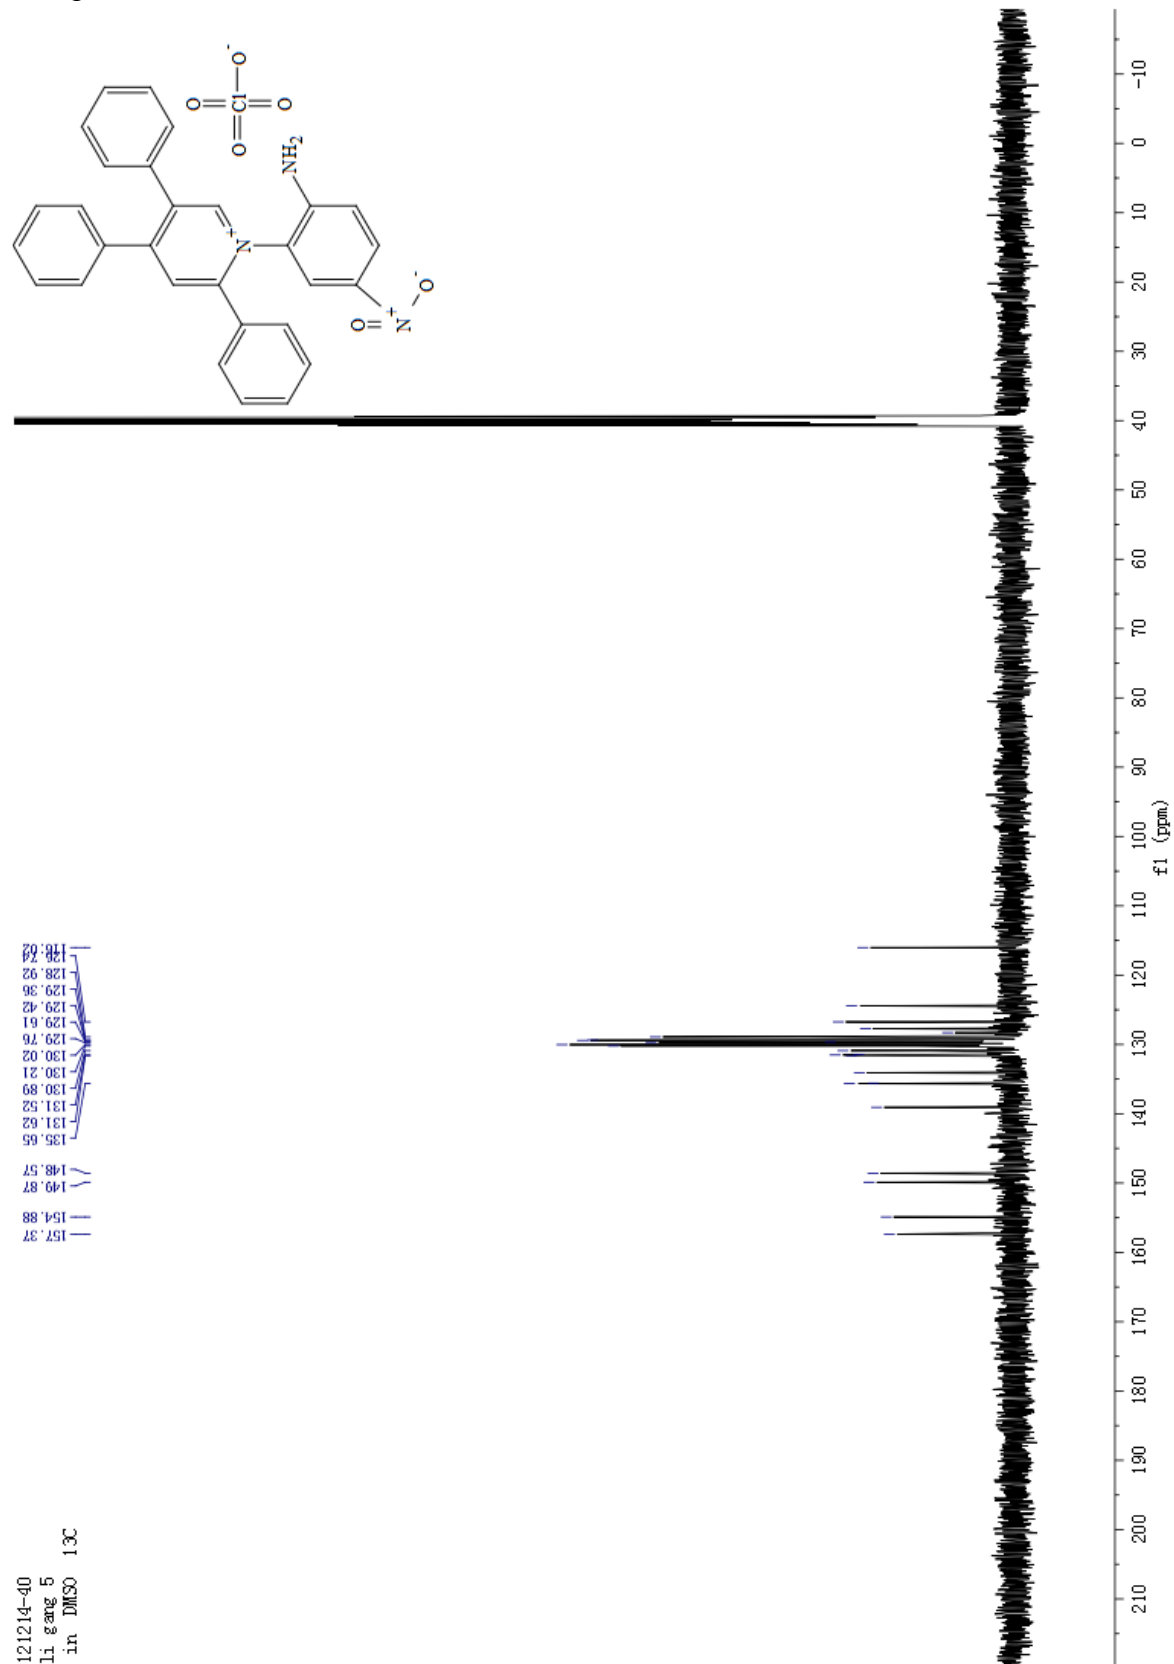



Compound 1m:

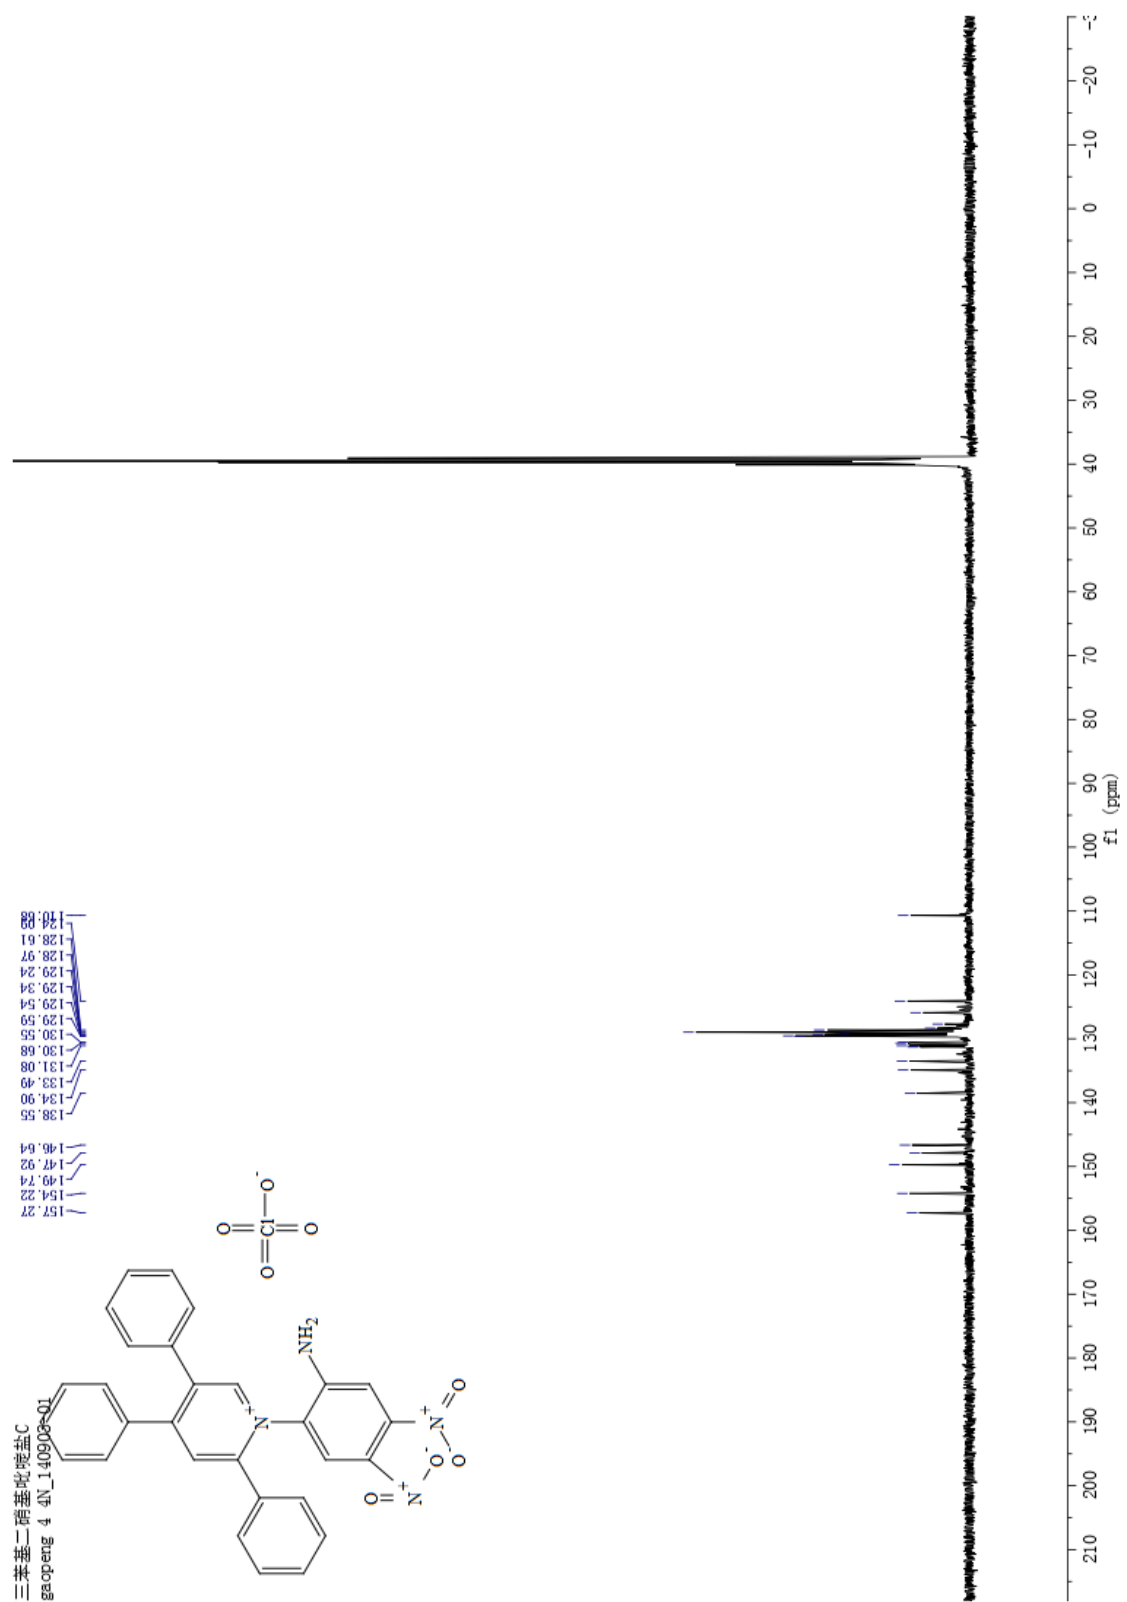

Compound 1k:

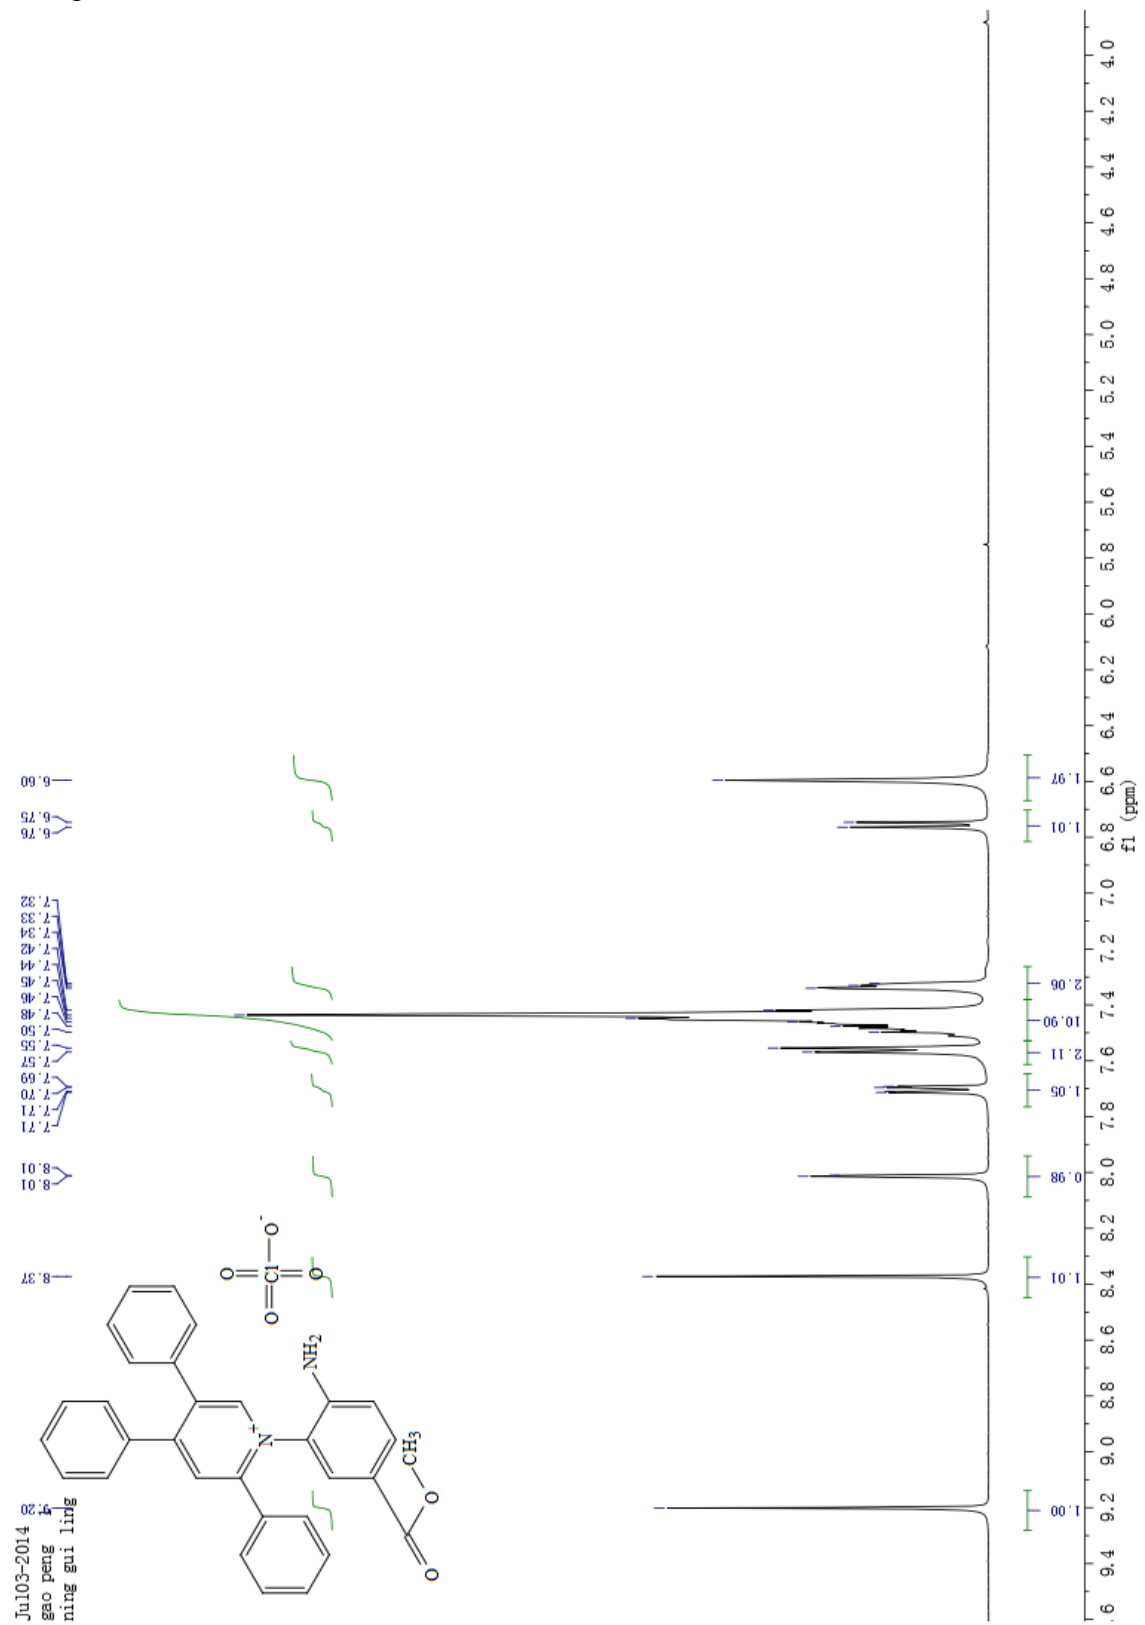



Compound 1f:

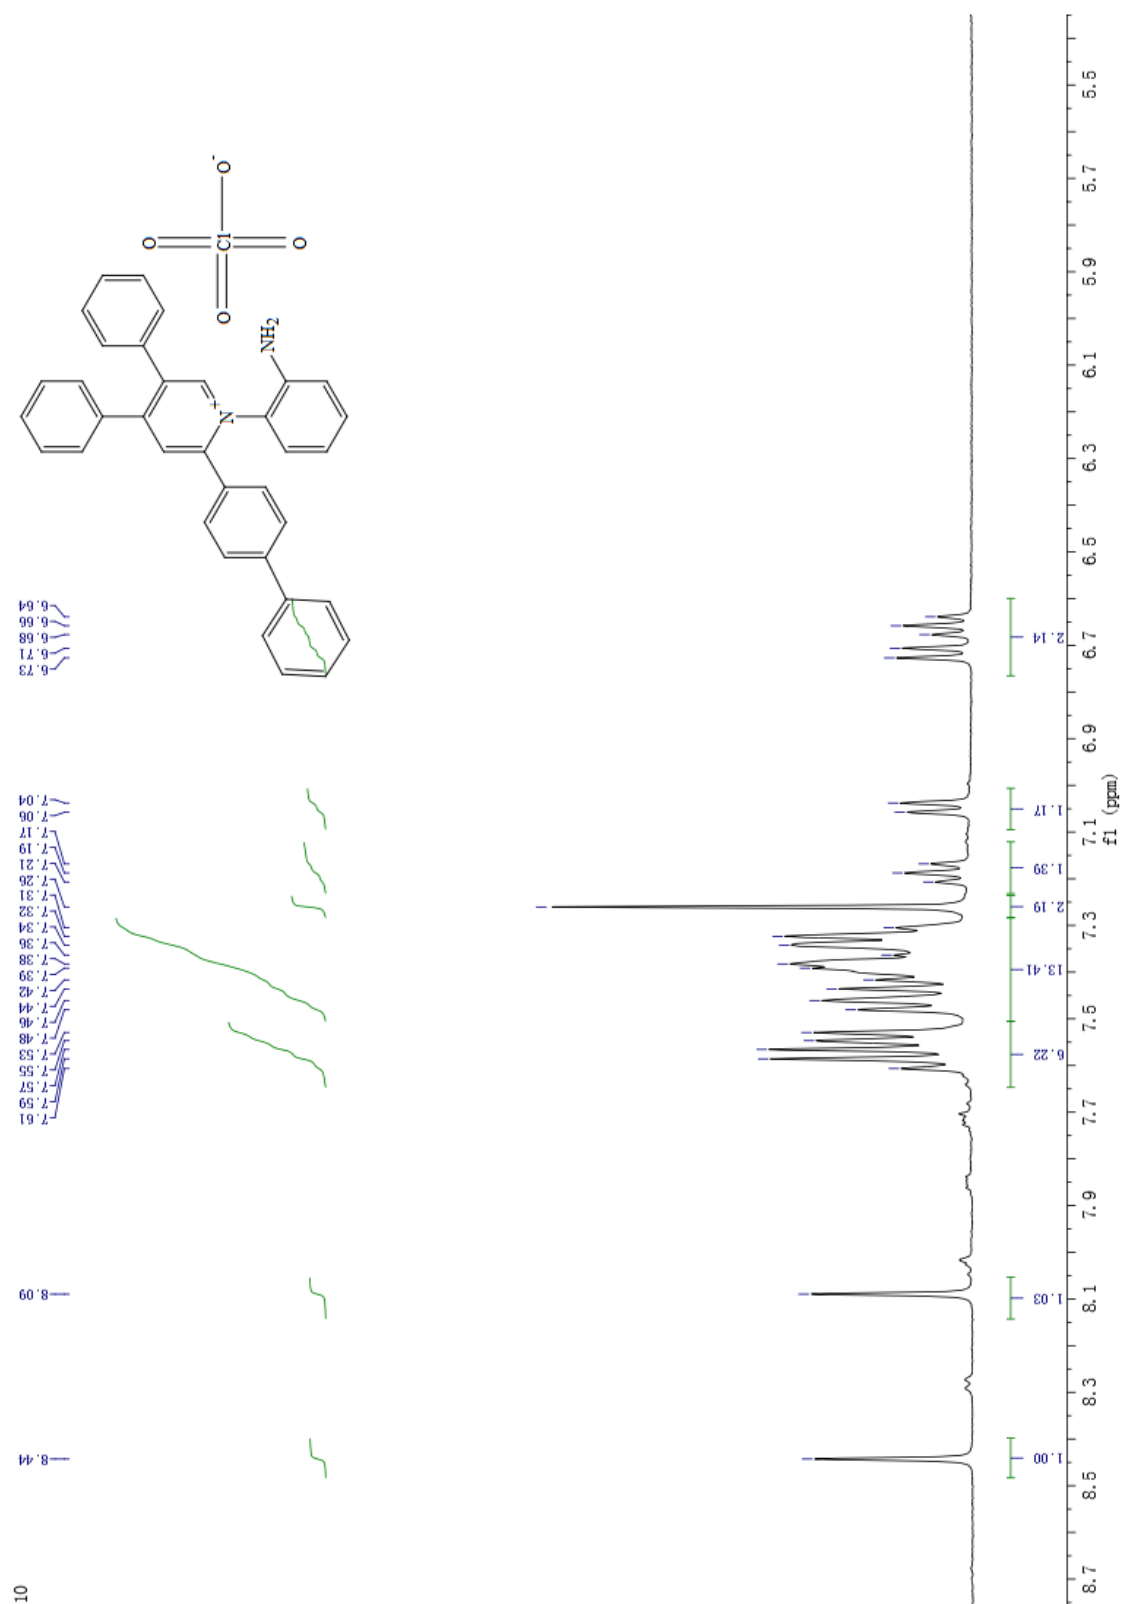





Compound 1g:

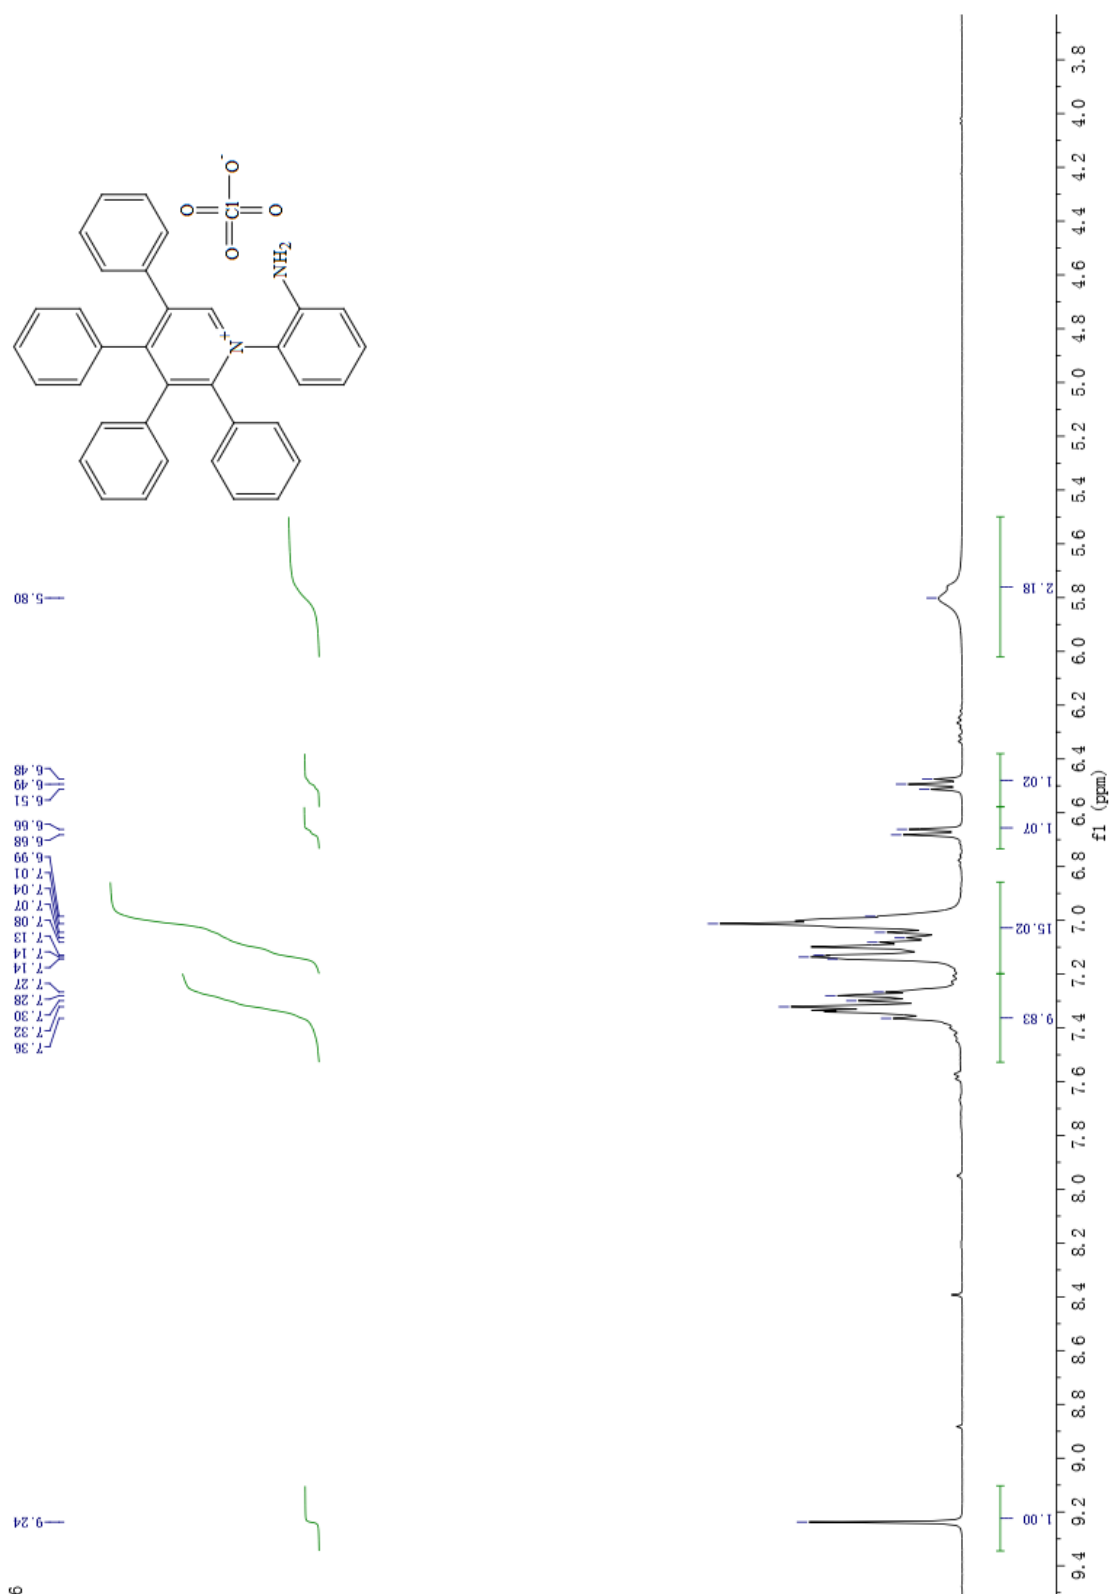

Compound 1g:

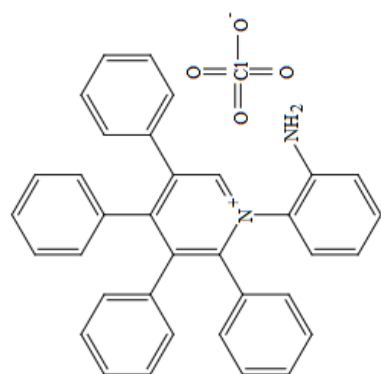

146.09  
143.07  
142.82  
140.48  
135.51  
134.43  
131.60  
130.84  
130.63  
130.32  
128.85  
128.42  
128.28  
128.10  
127.87  
127.41  
116.54  
115.69

157.21  
154.76

9

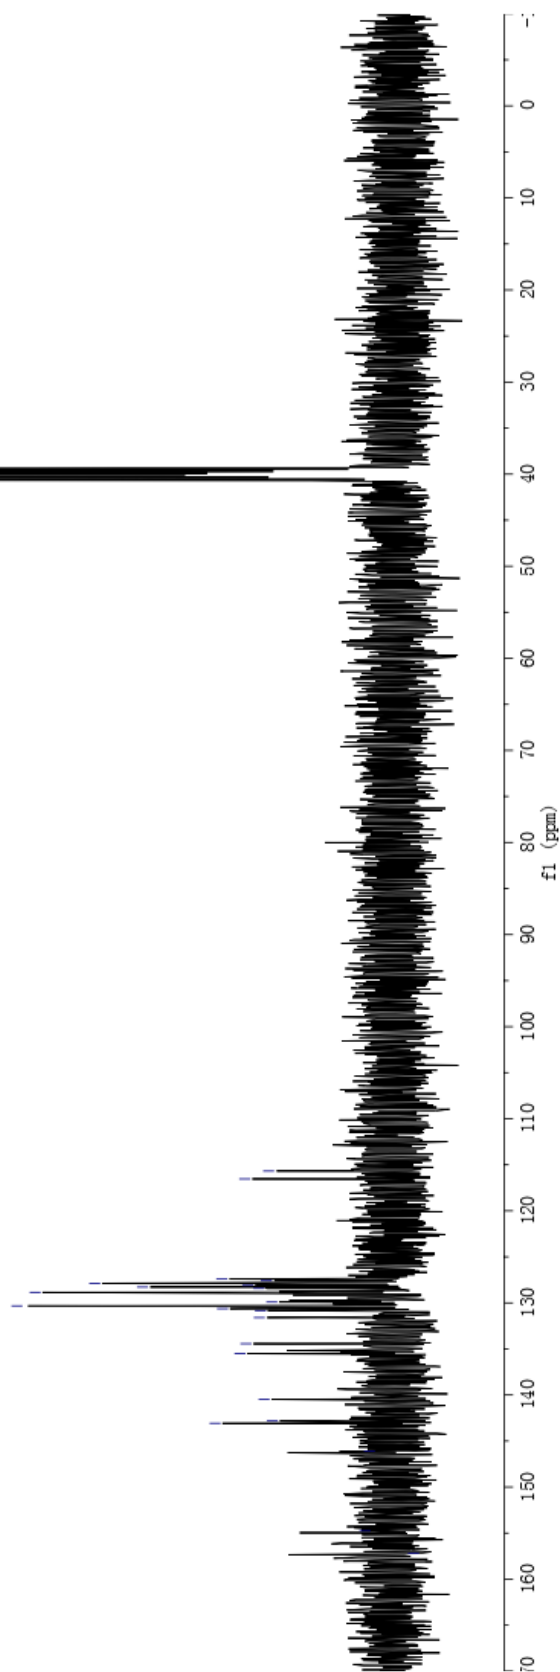

Compound 1h:

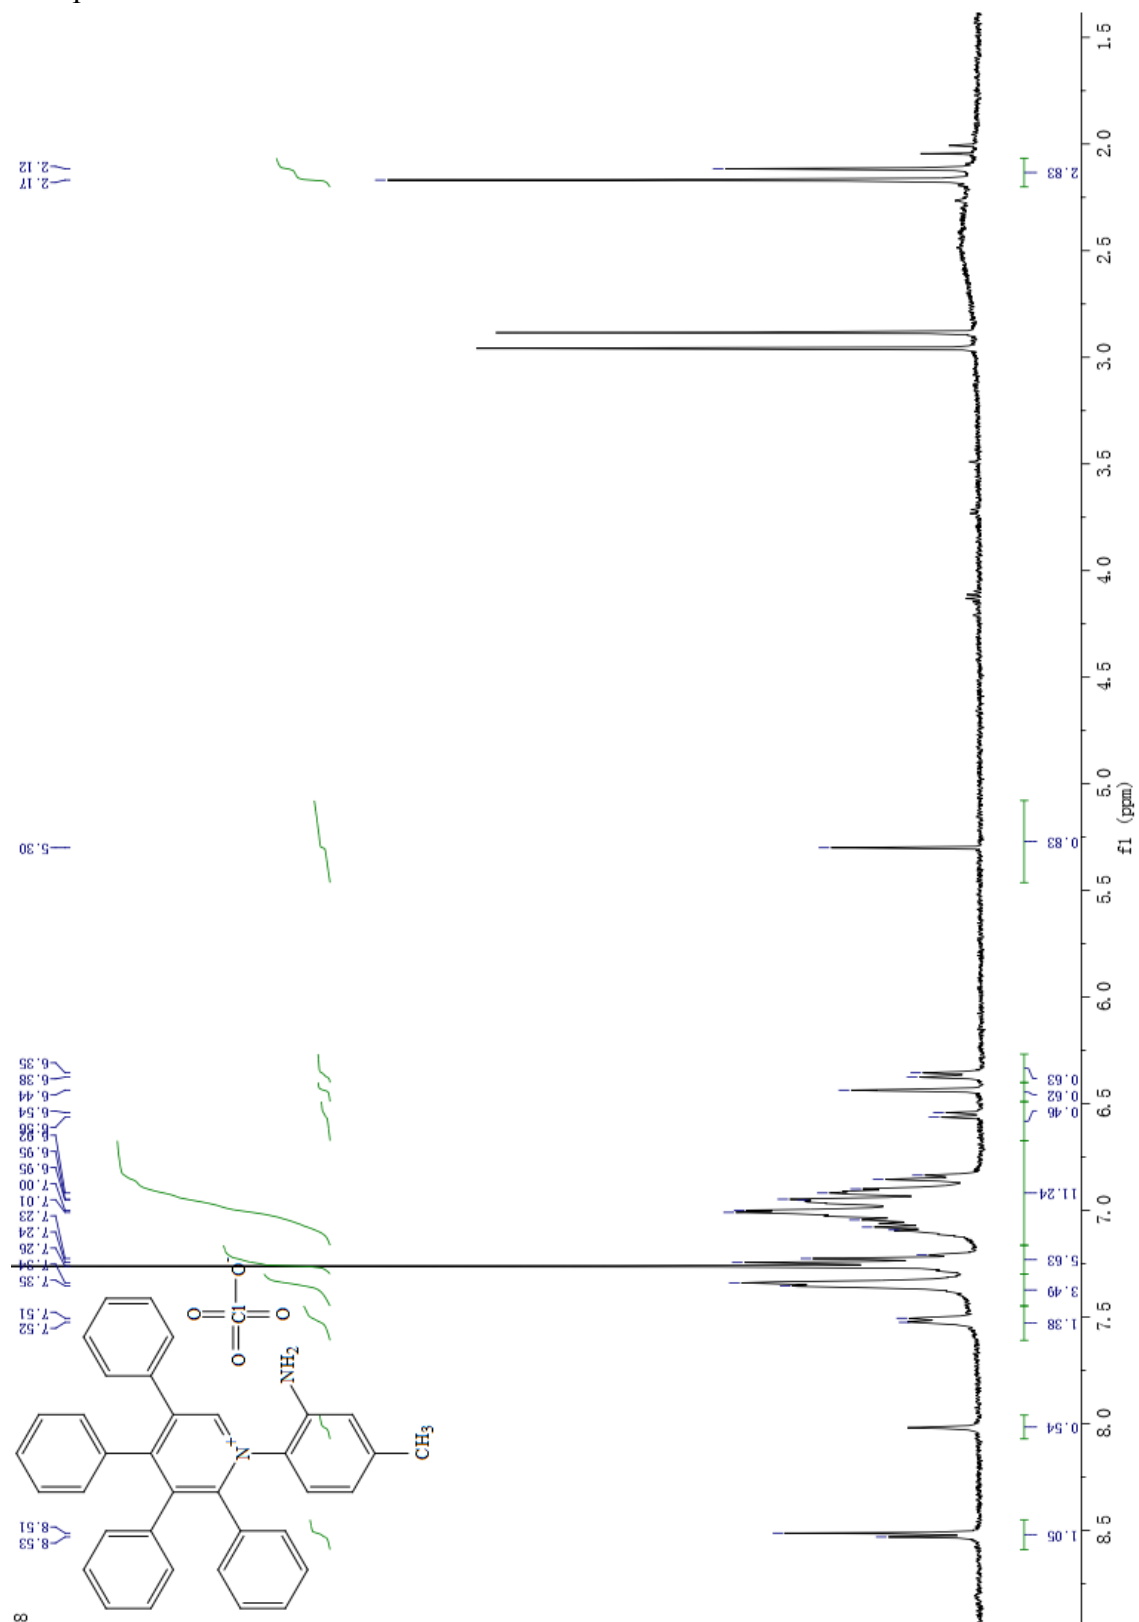

Compound 1h:

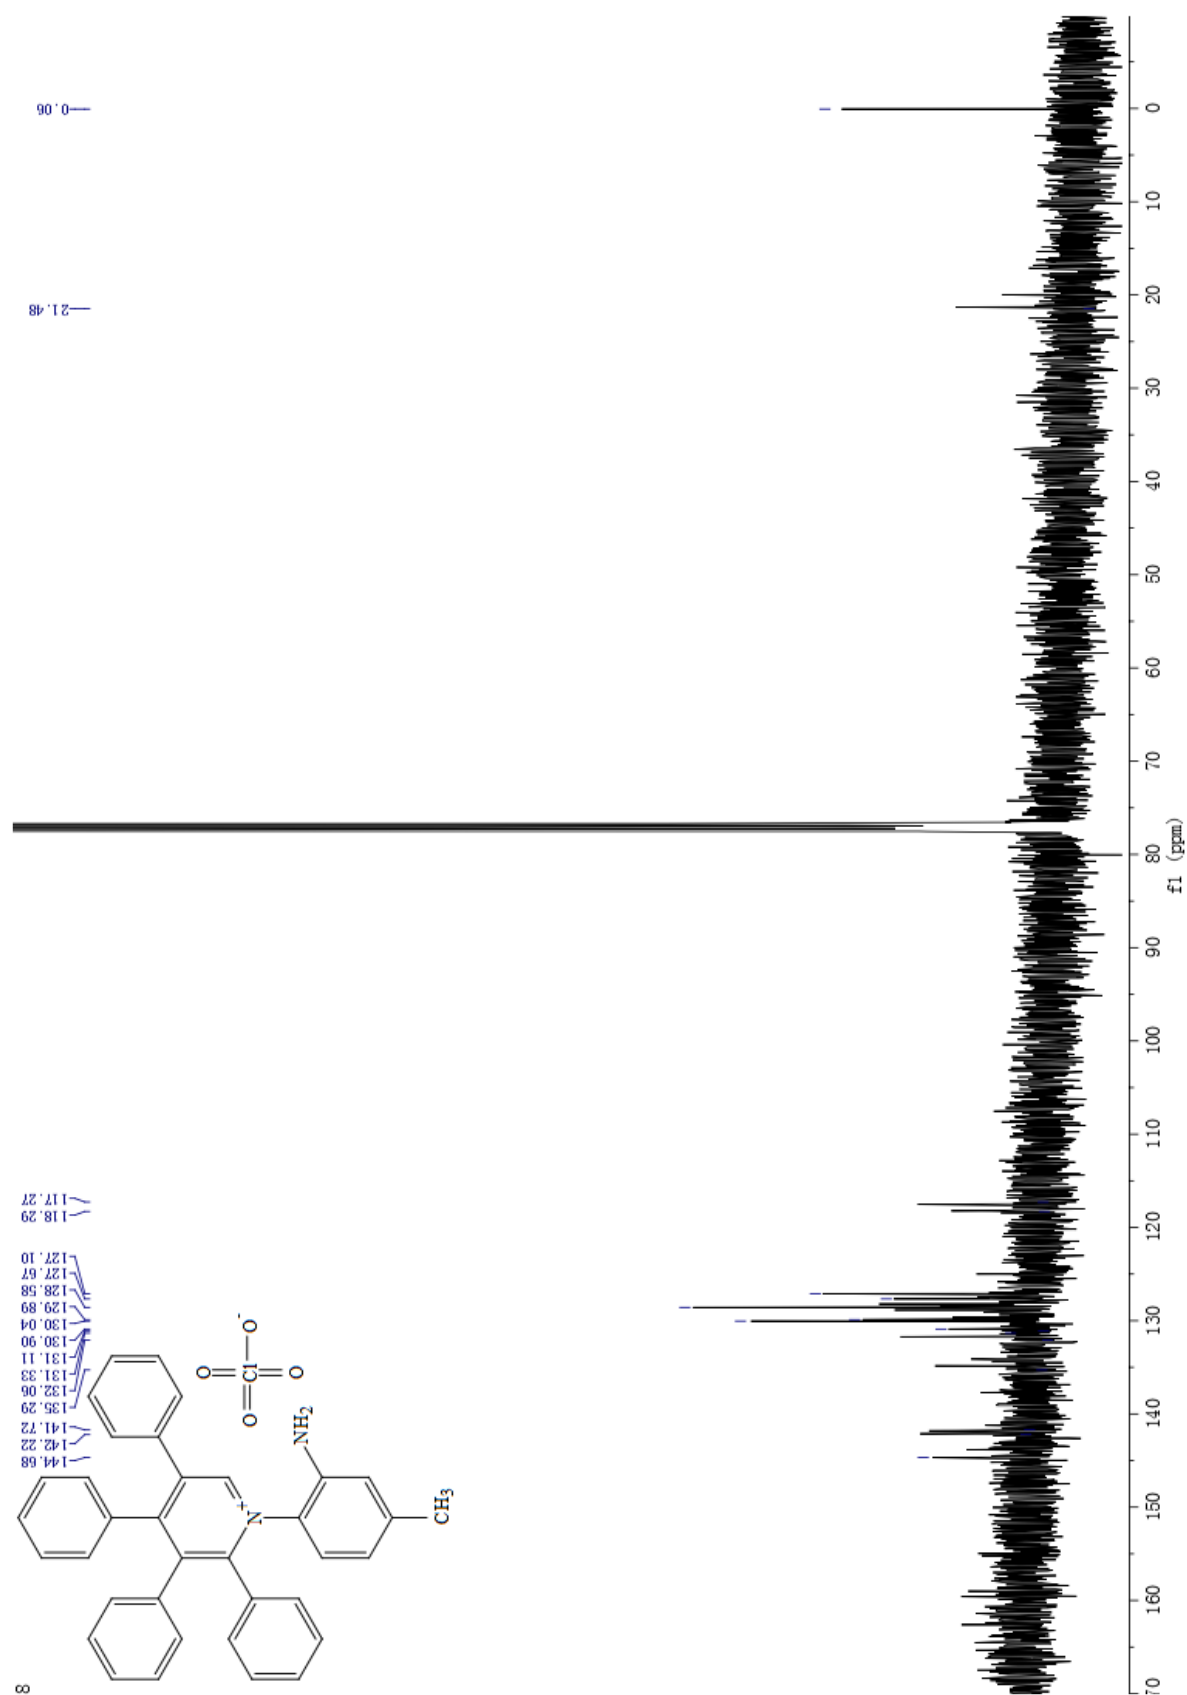

Compound 1i:

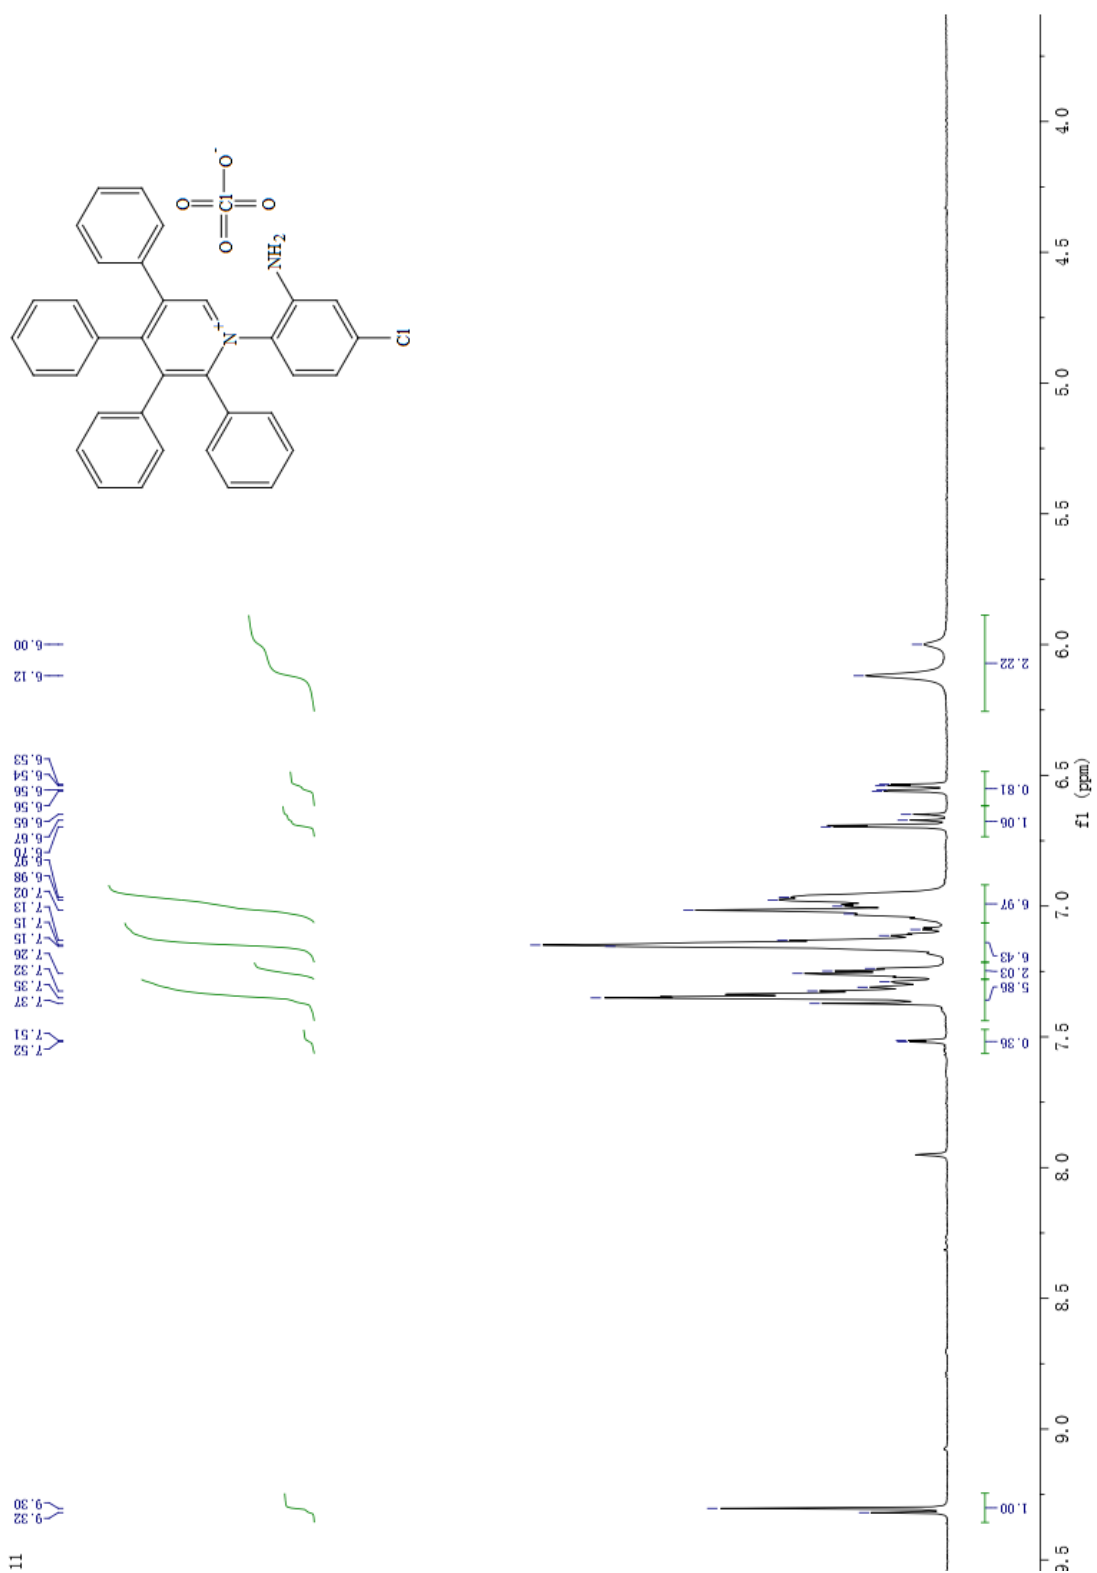

Compound 1i:

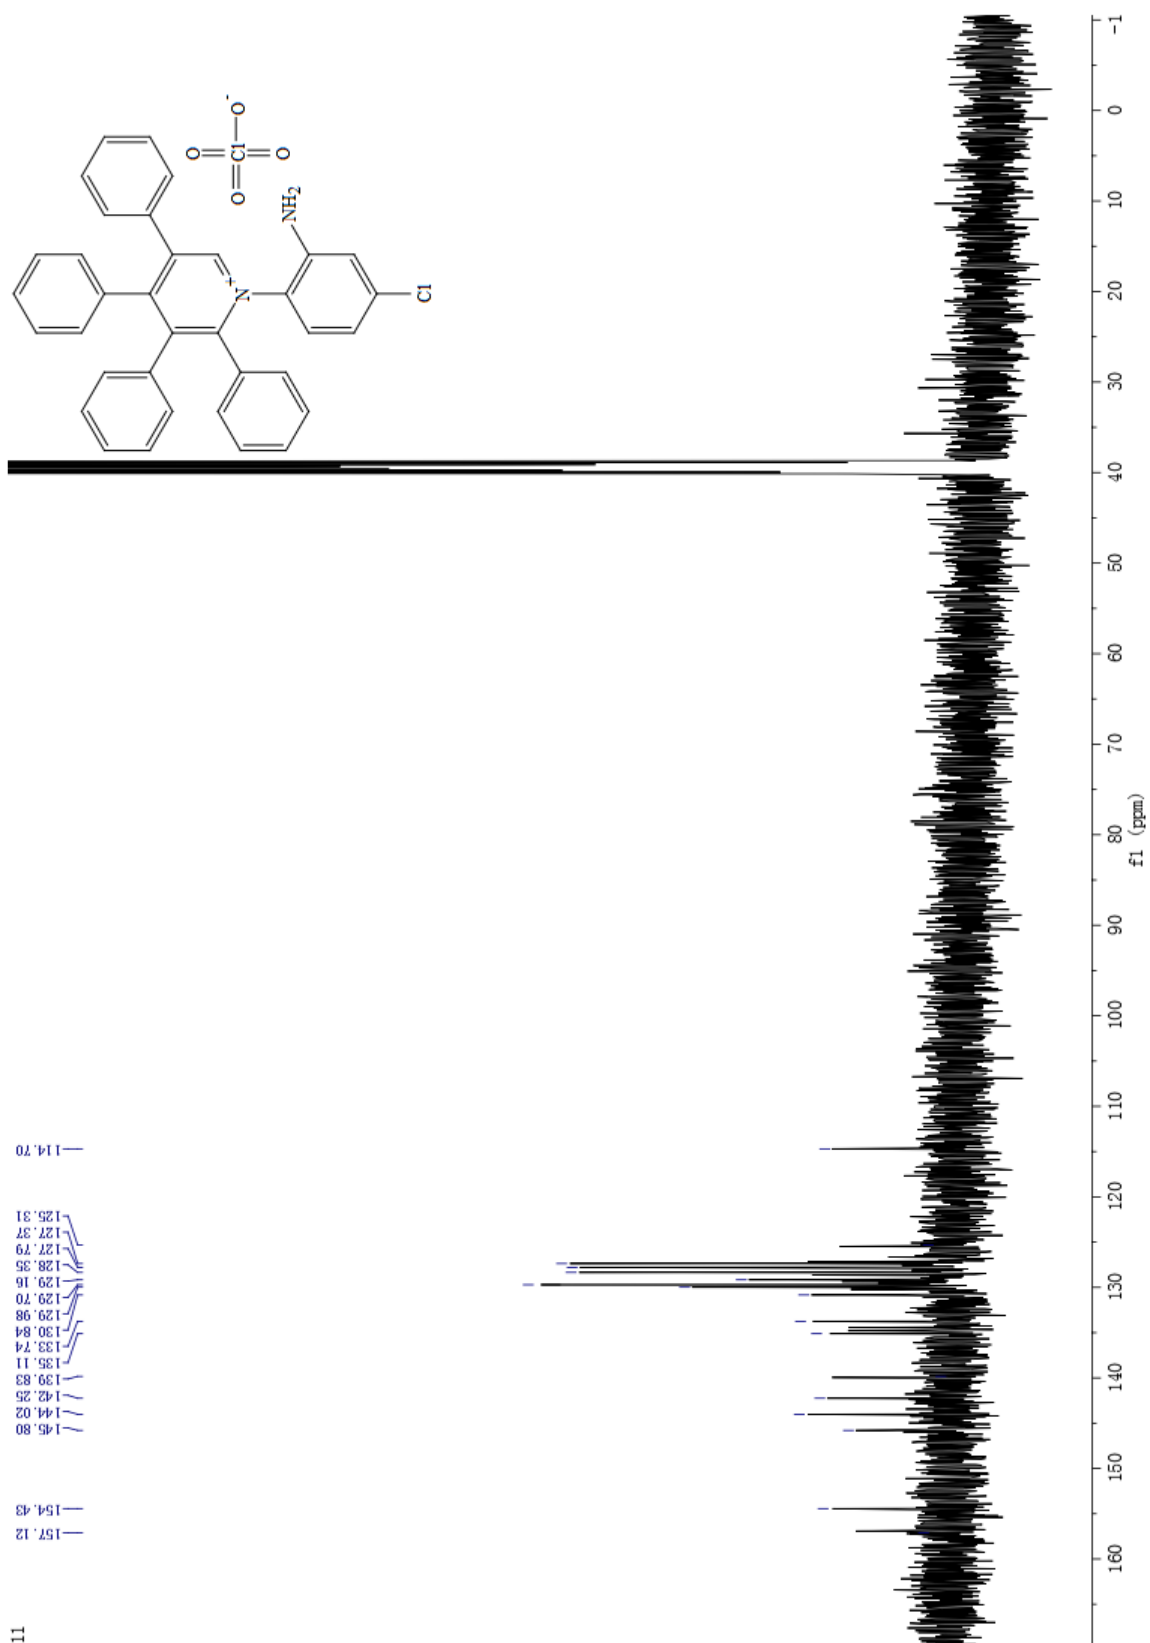

11

Compound 11:

Jul03-2014  
gao peng 4  
ning gui ling

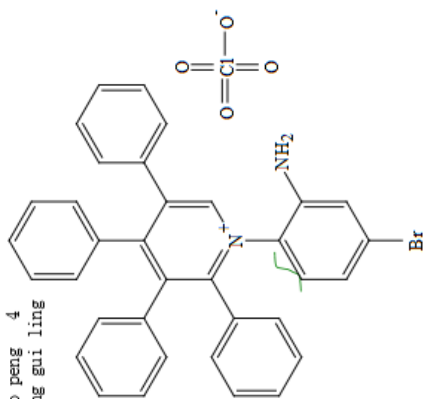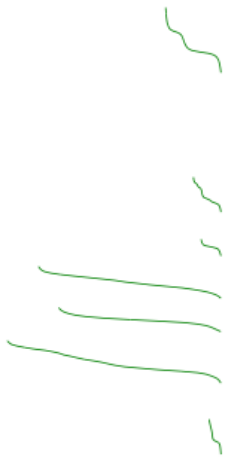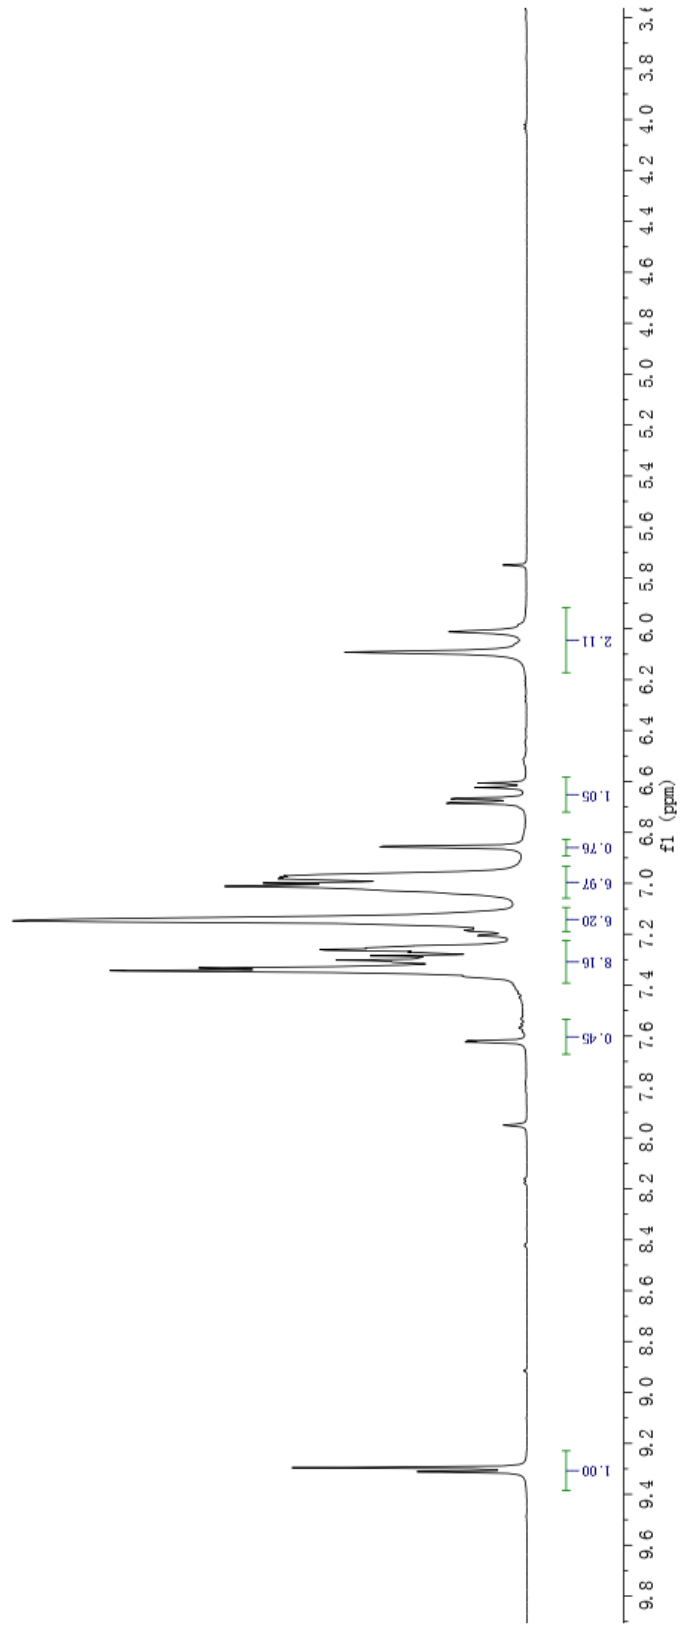





Compound 1p:

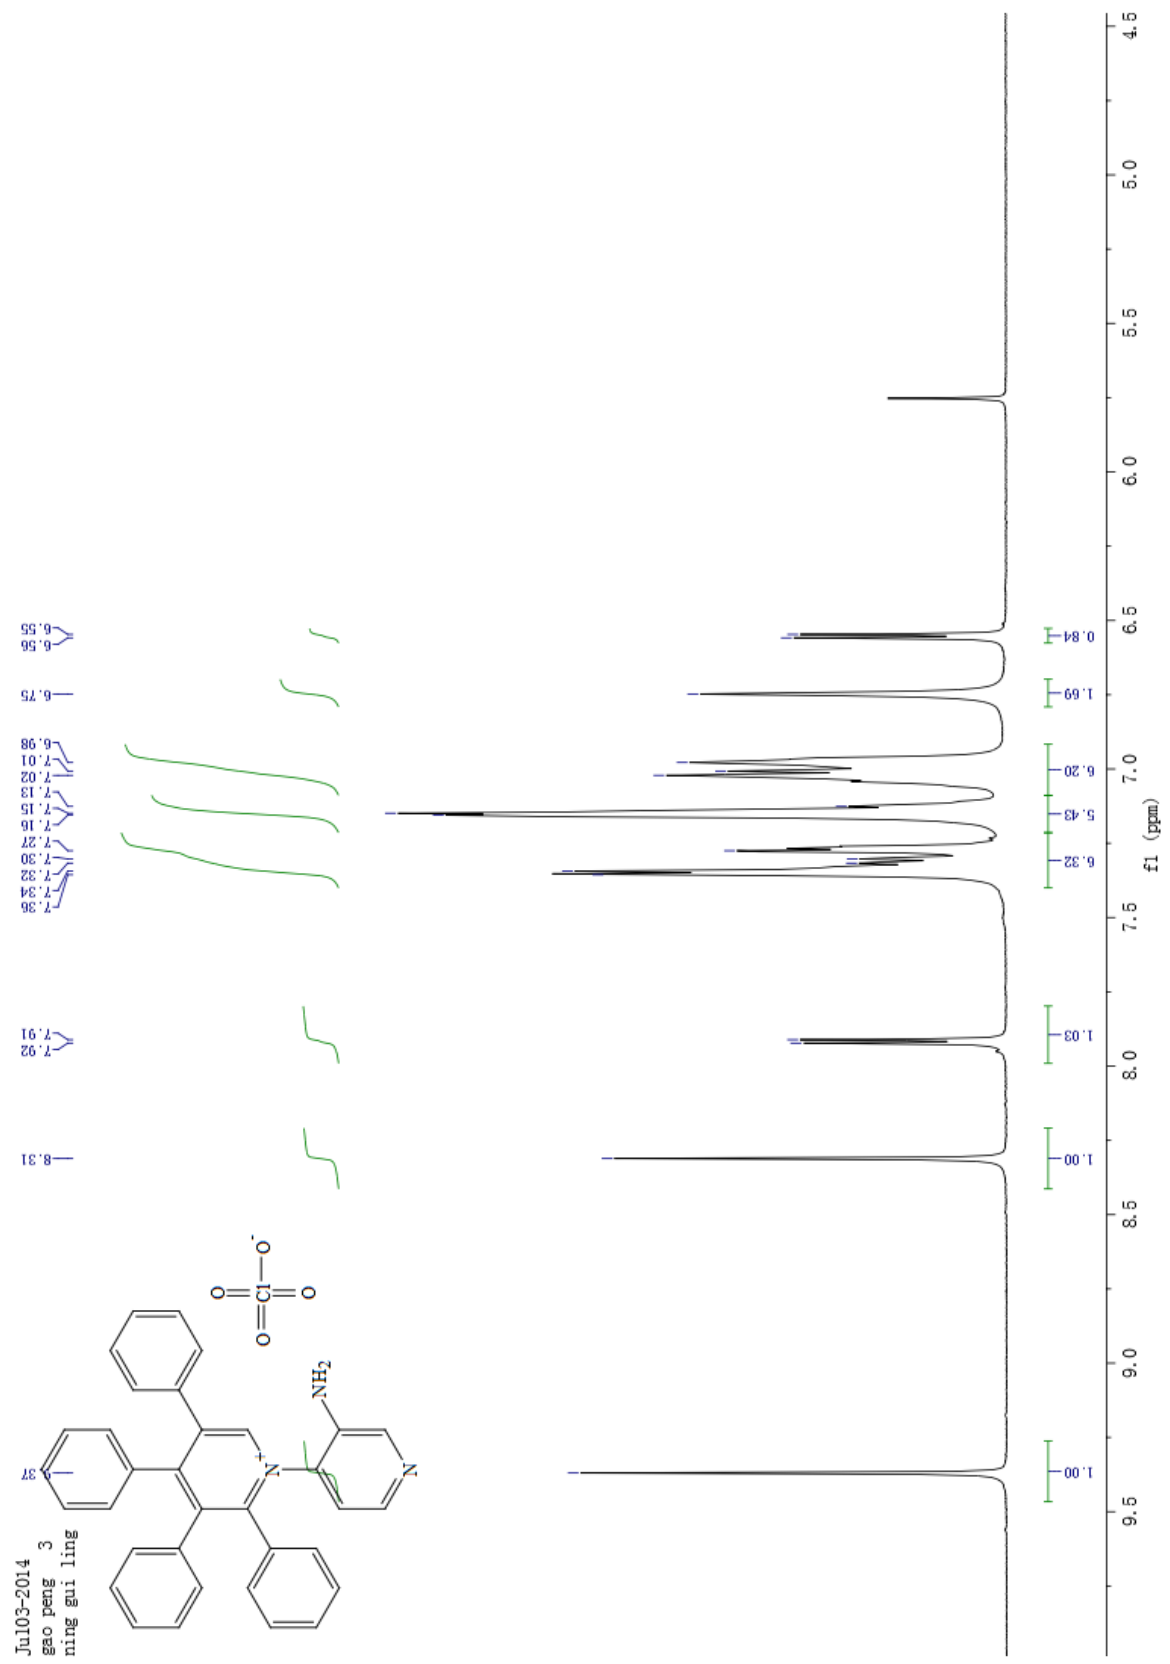

Compound 1p:

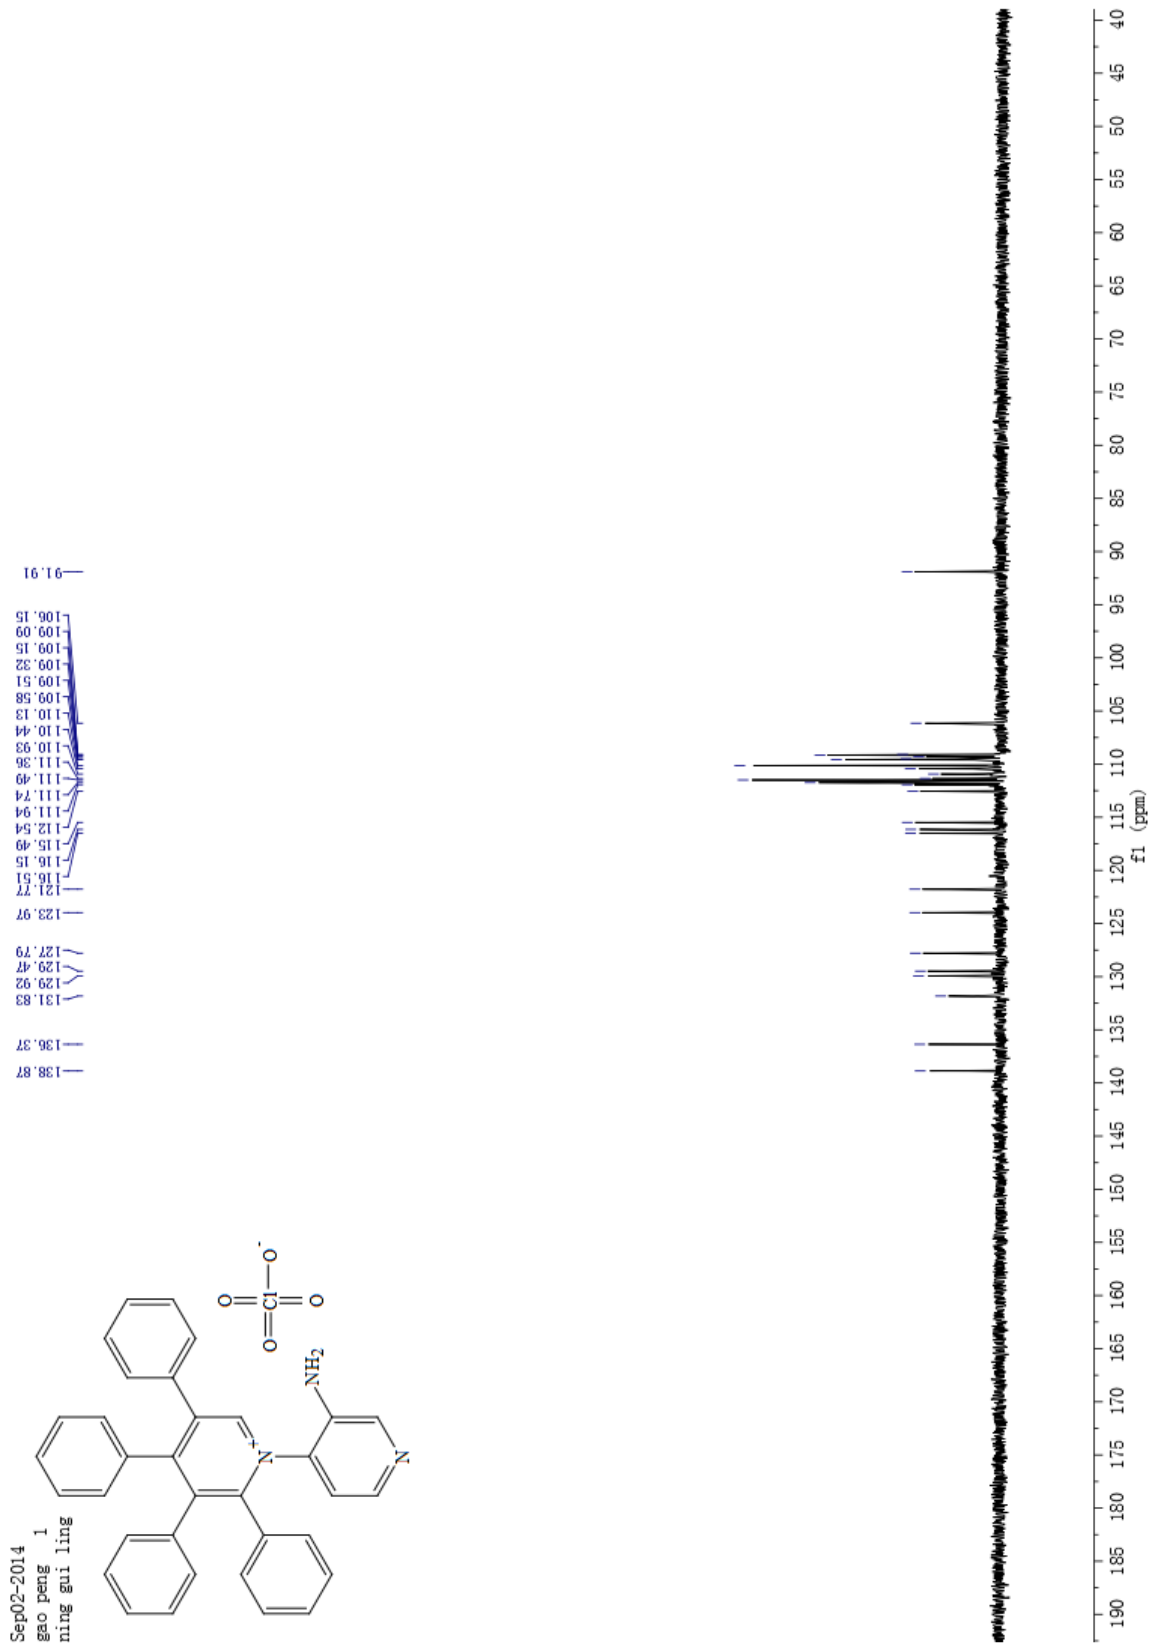

Compound 1j:

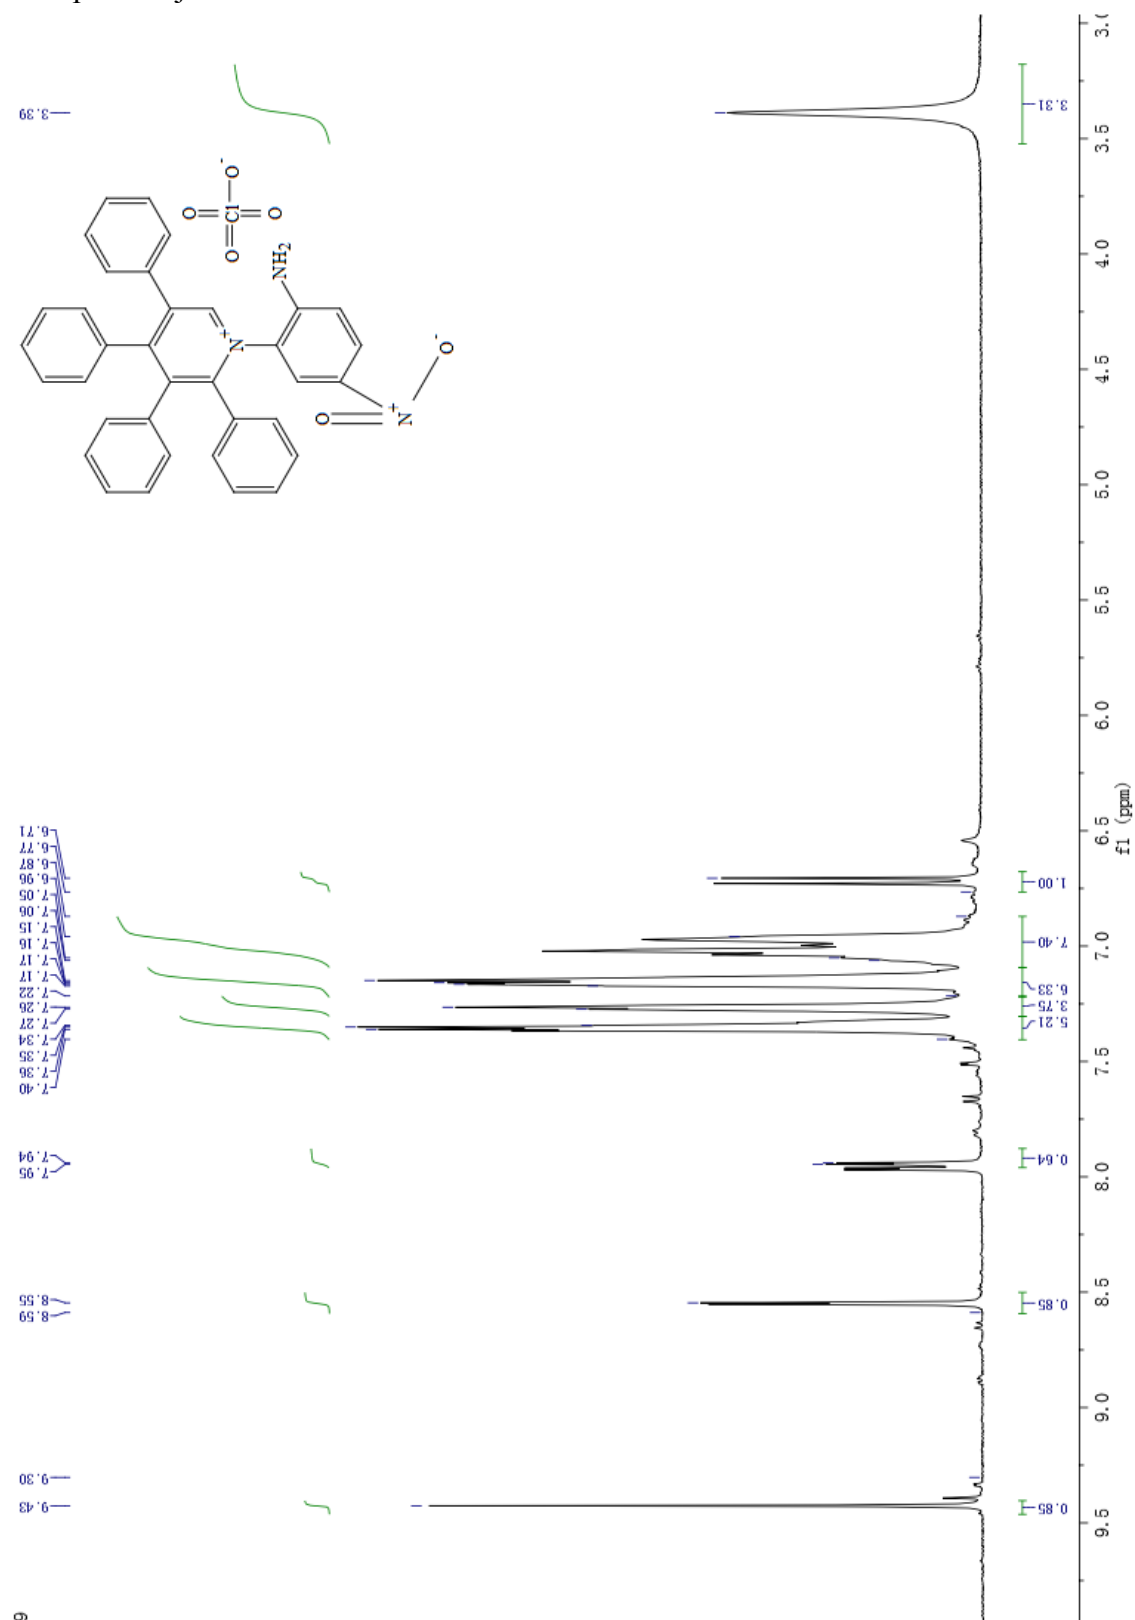

Compound 1j:

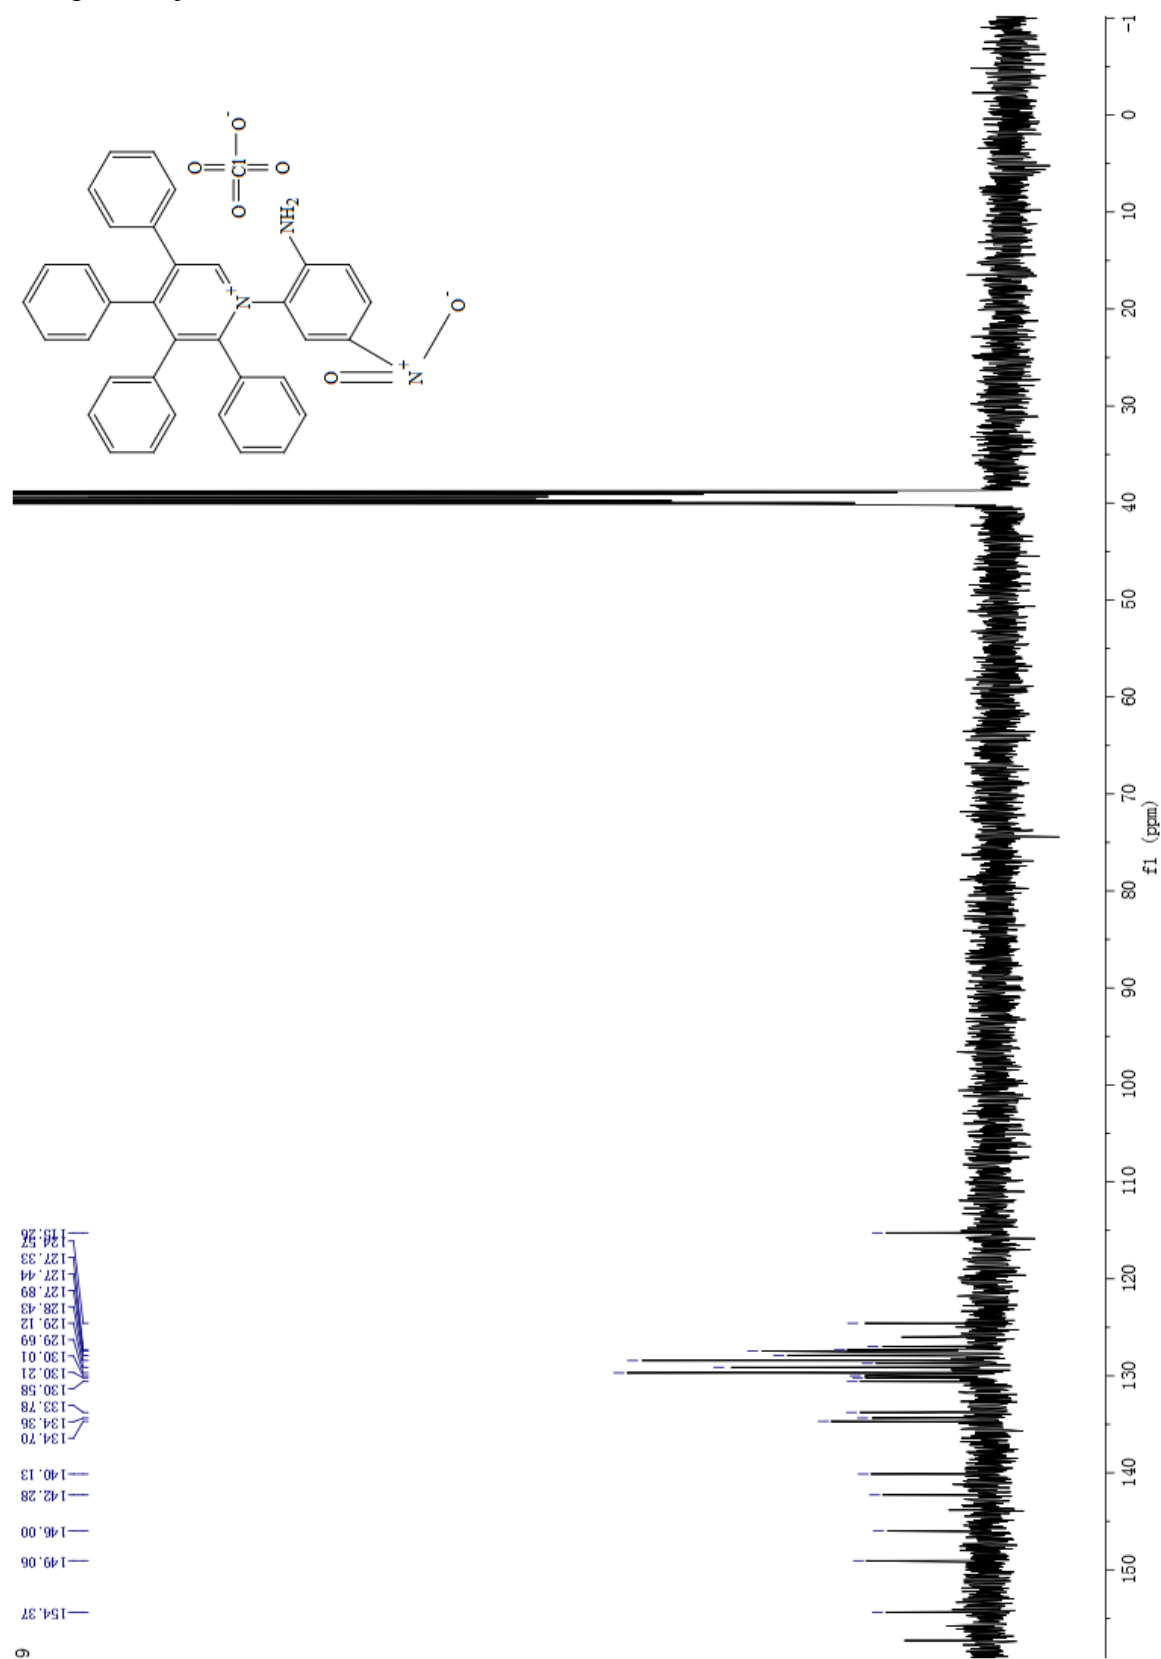

Compound 1n:

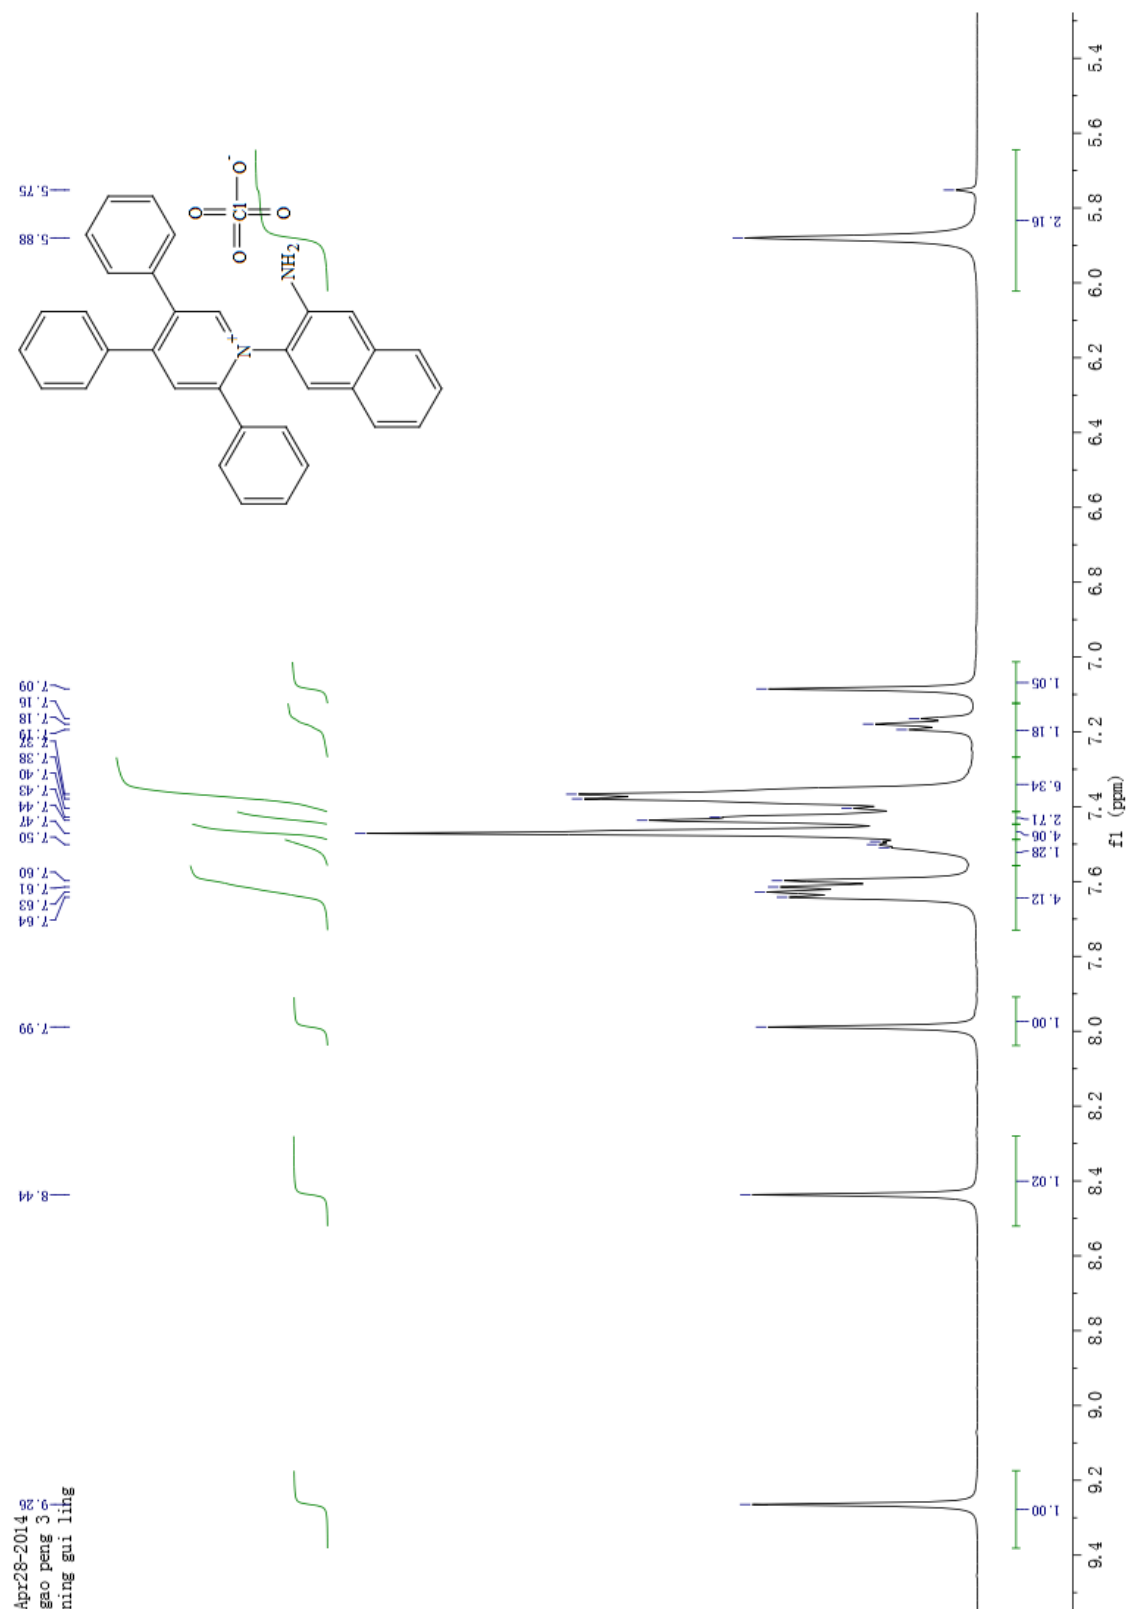

Apr28-2014  
 Geo peng  
 ning gui ling

Compound 1n:

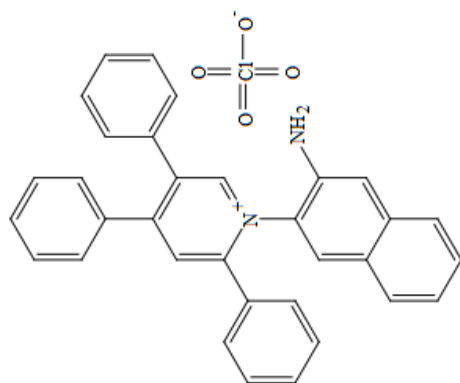

109.32  
122.59  
124.84  
125.29  
127.64  
127.82  
128.05  
128.31  
128.78  
128.86  
129.05  
129.40  
129.46  
129.58  
129.81  
130.30  
130.69  
131.00  
131.54  
133.60  
135.12  
135.22  
138.23  
140.83  
147.77  
154.22  
156.60

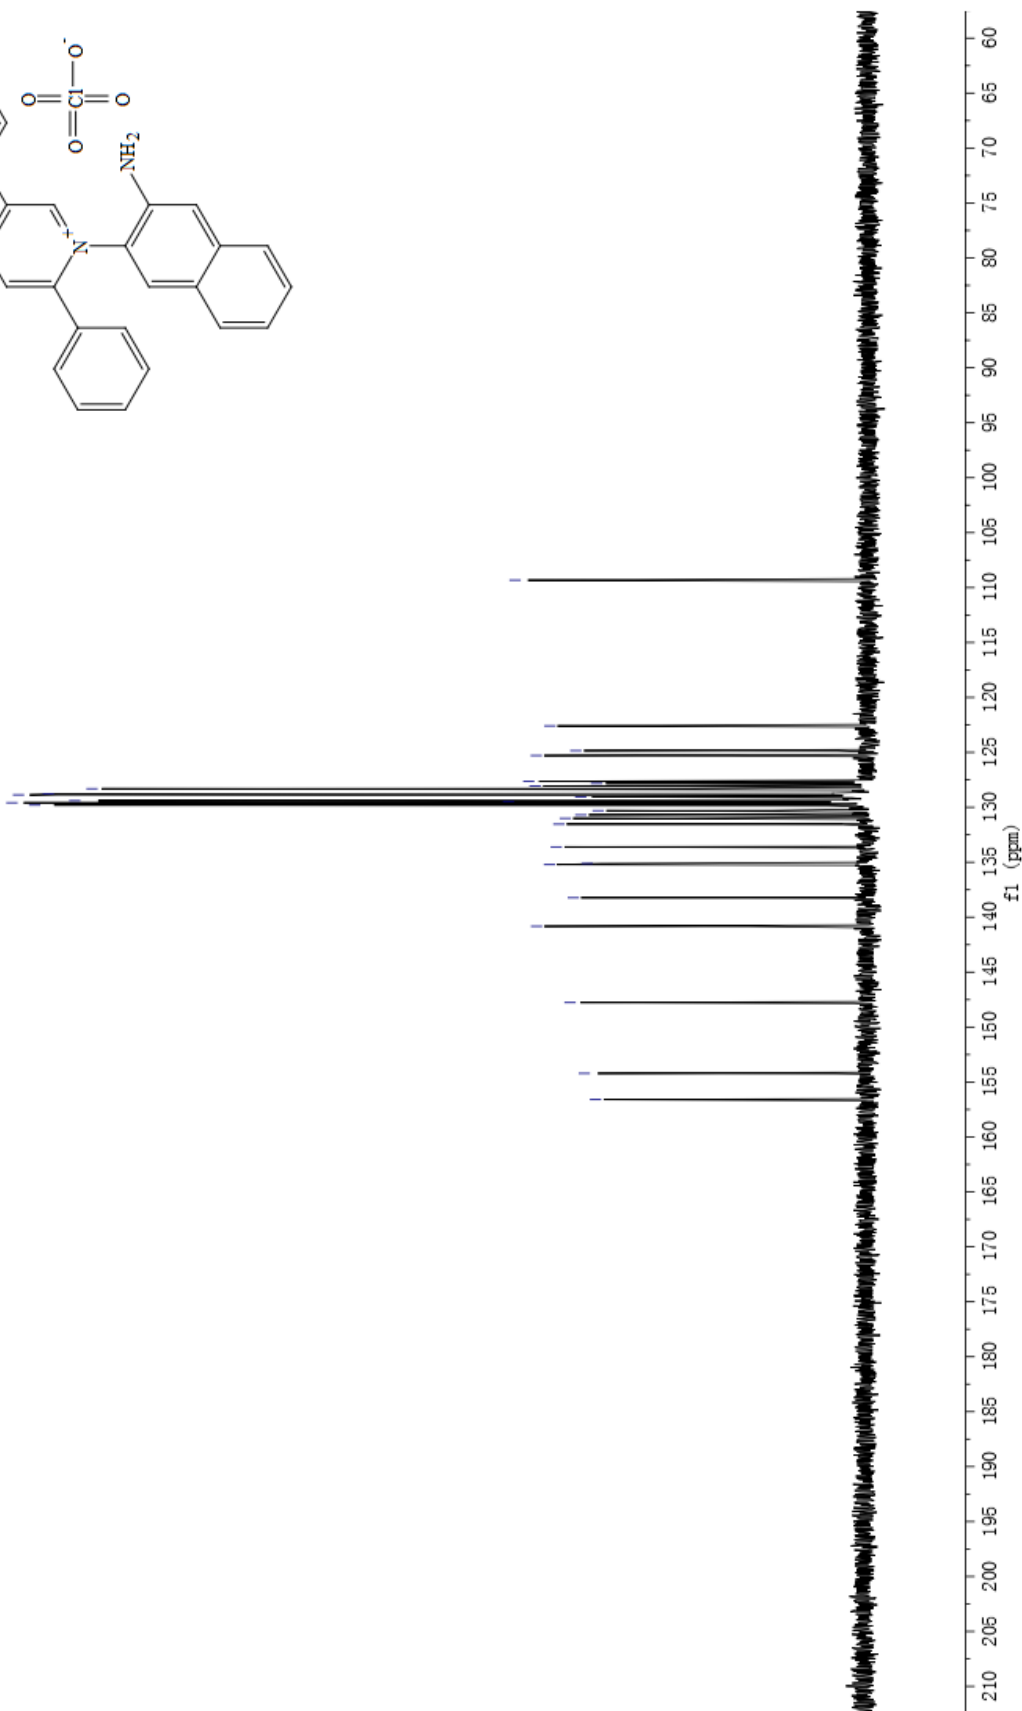

Apr28-2014  
gao peng 3  
ning gui ling

Compound 1o:

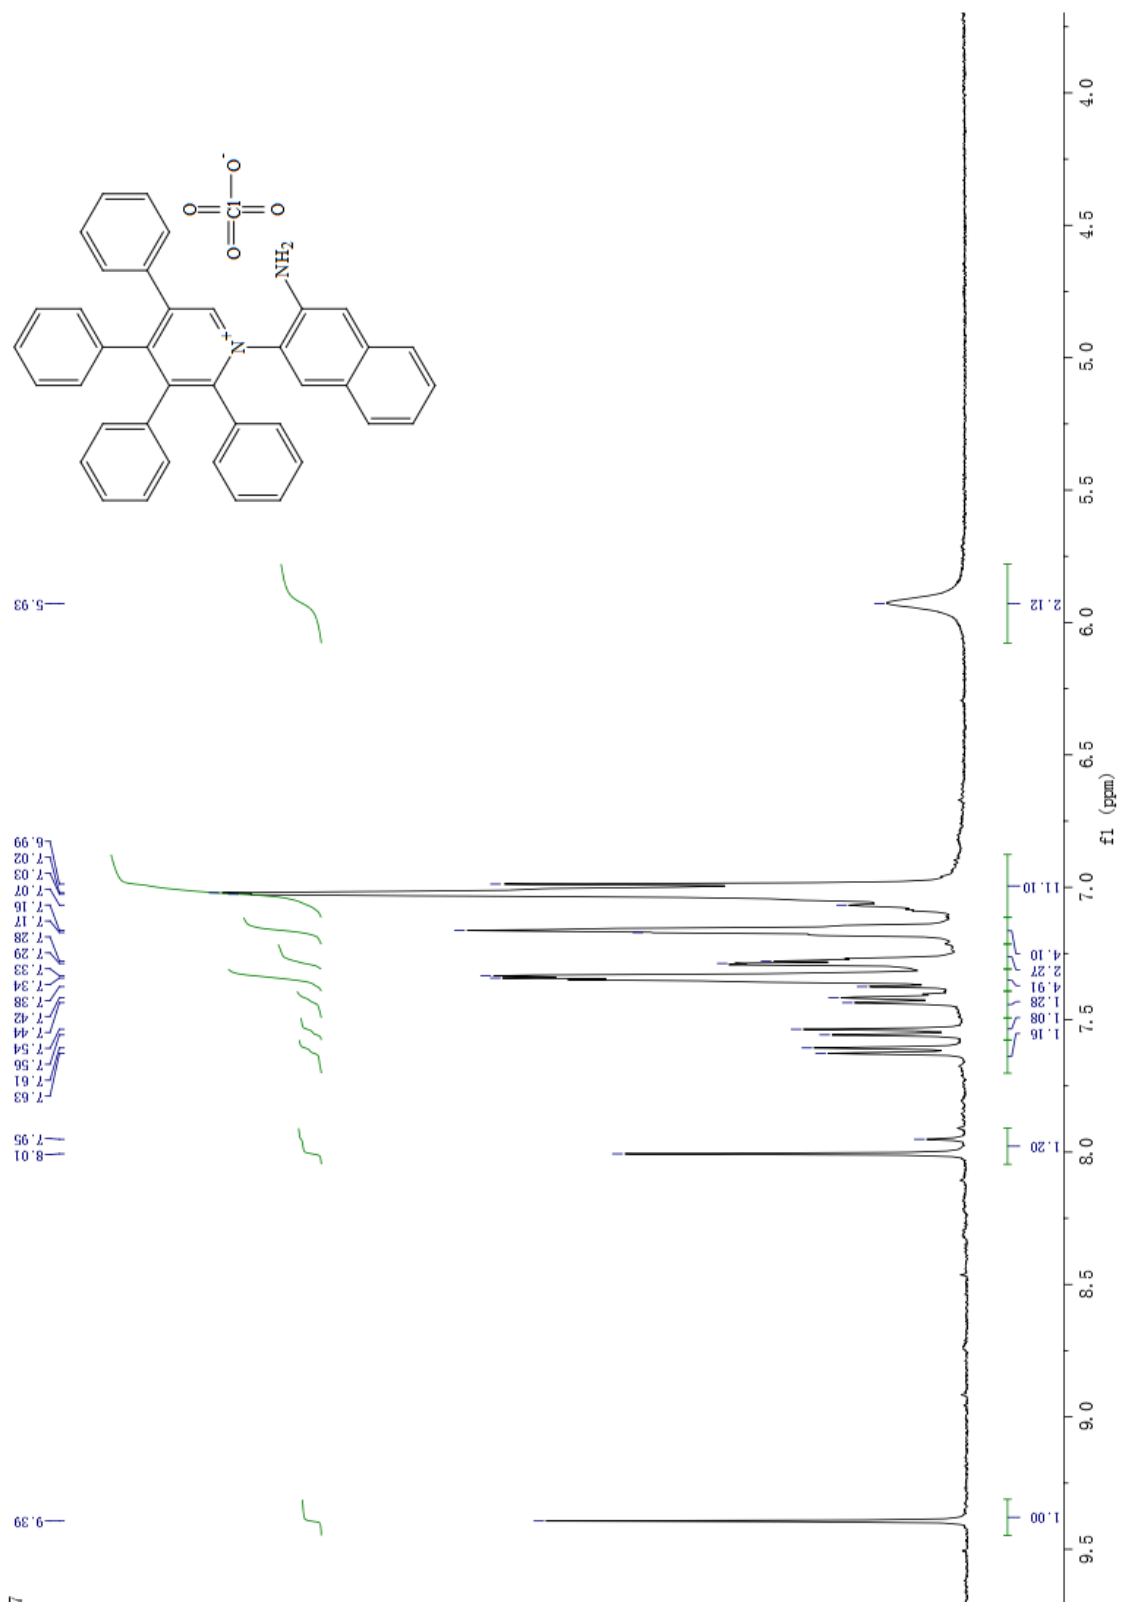



Compound 1o:

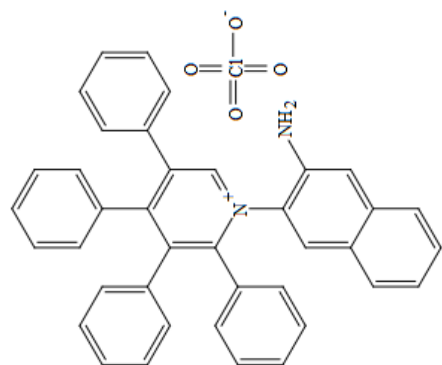

122.82  
124.59  
125.32  
127.38  
127.81  
128.35  
129.21  
129.75  
130.25  
131.23  
133.73  
134.46  
134.91  
139.63  
140.57  
142.57  
146.04  
148.24  
154.42  
157.16

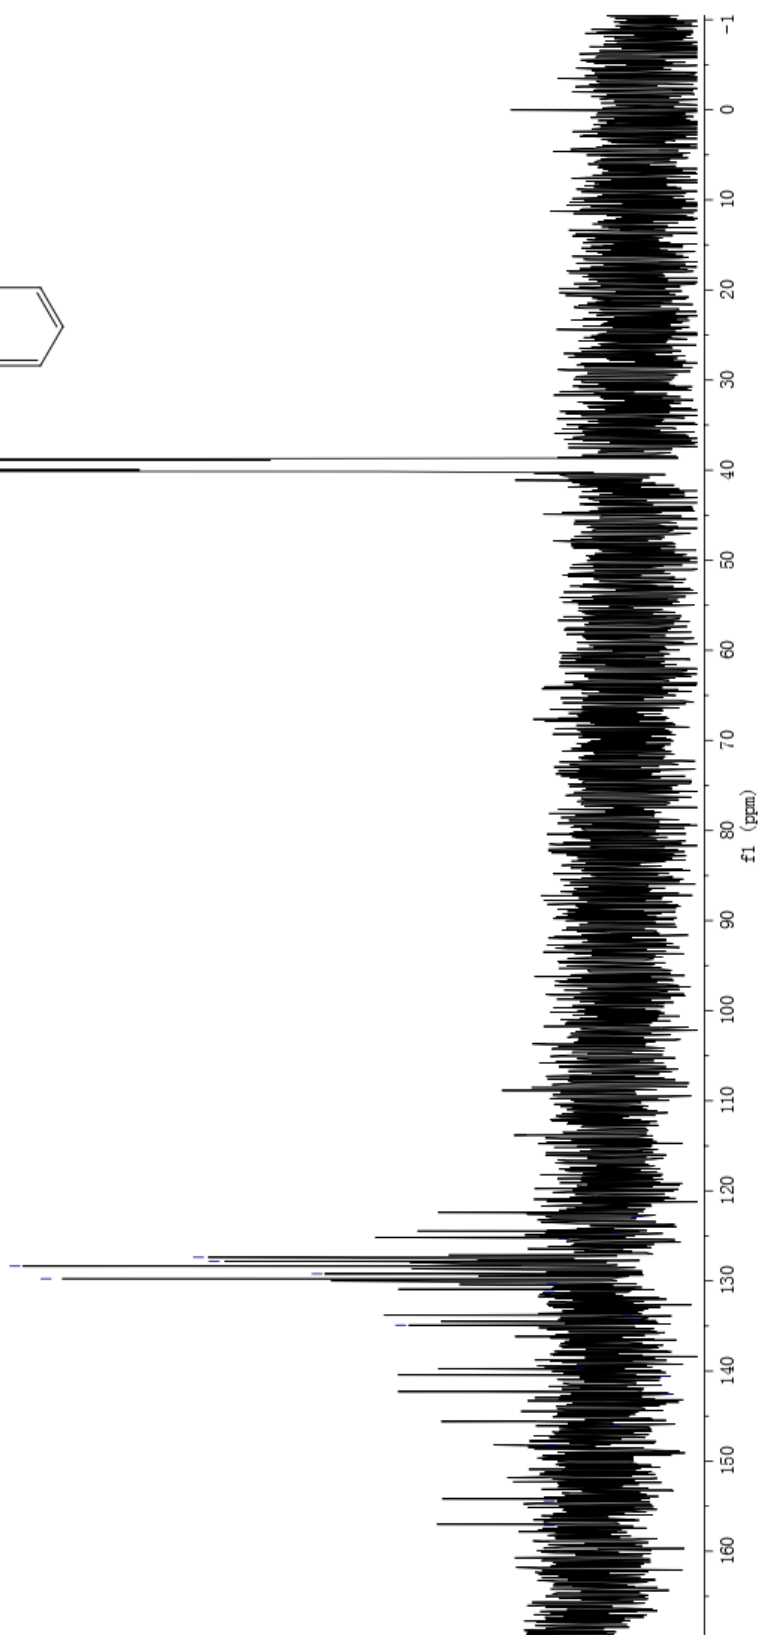

7

Compound 2b:

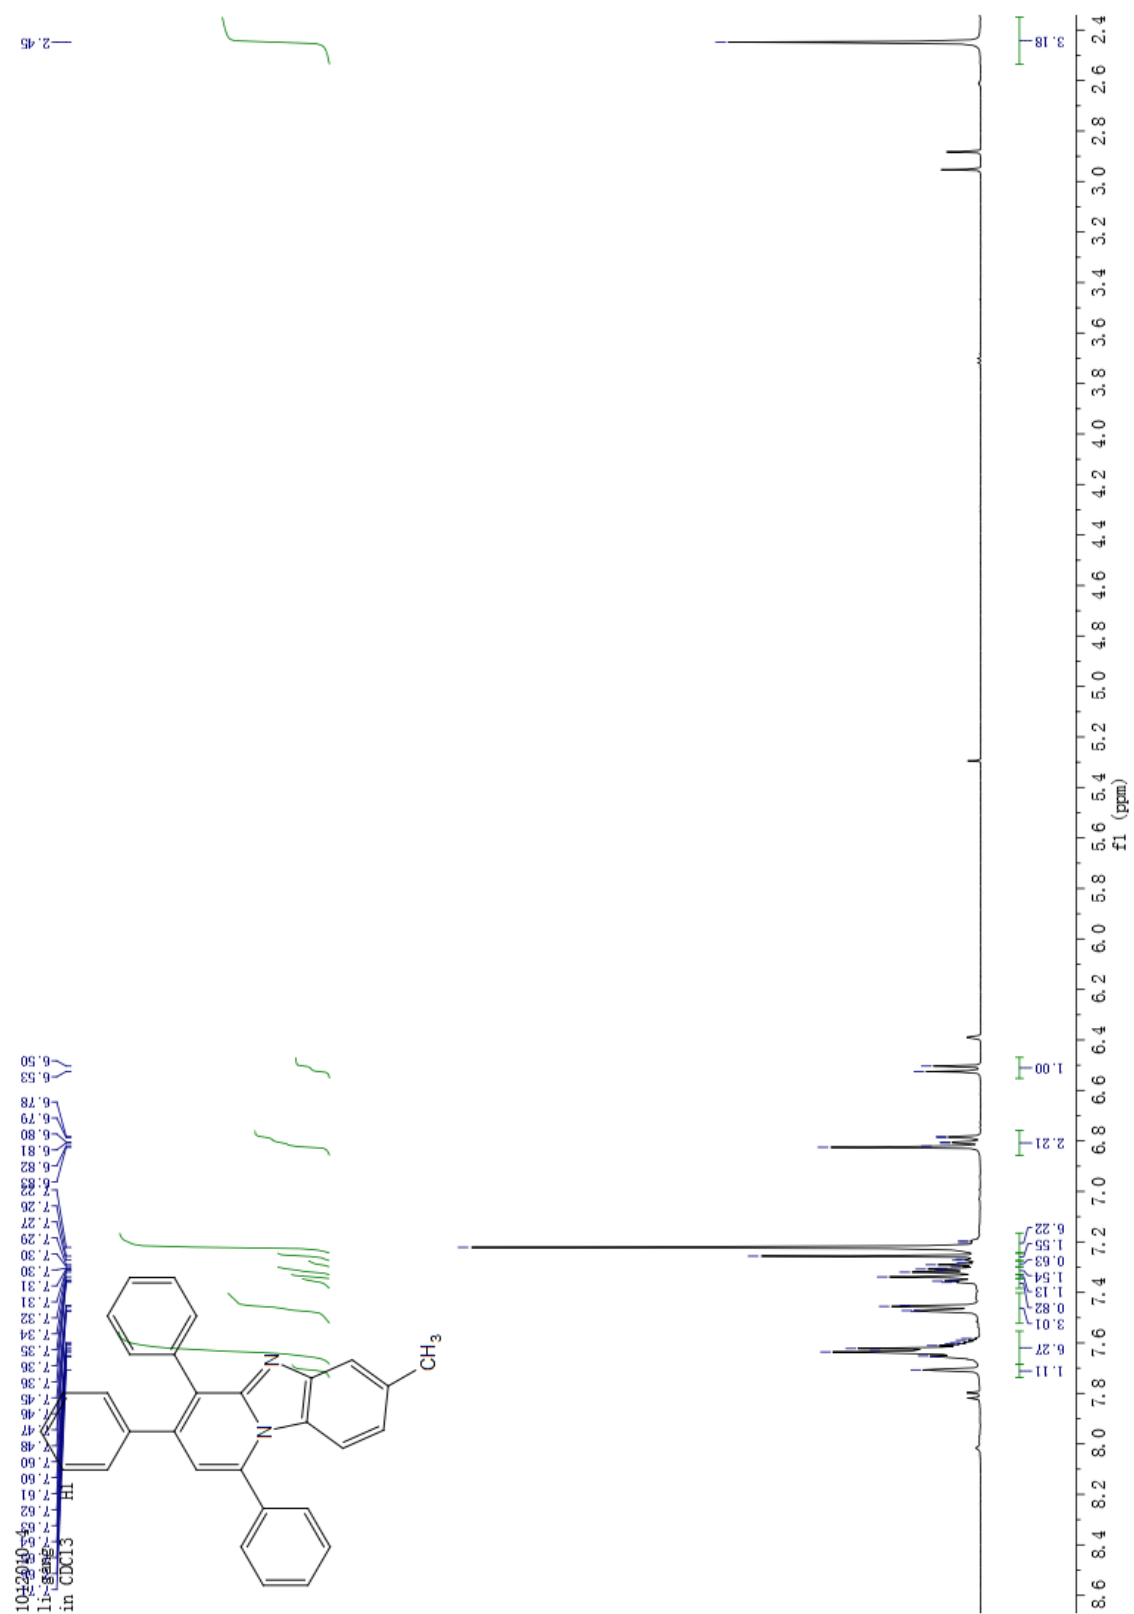

Compound 2b:

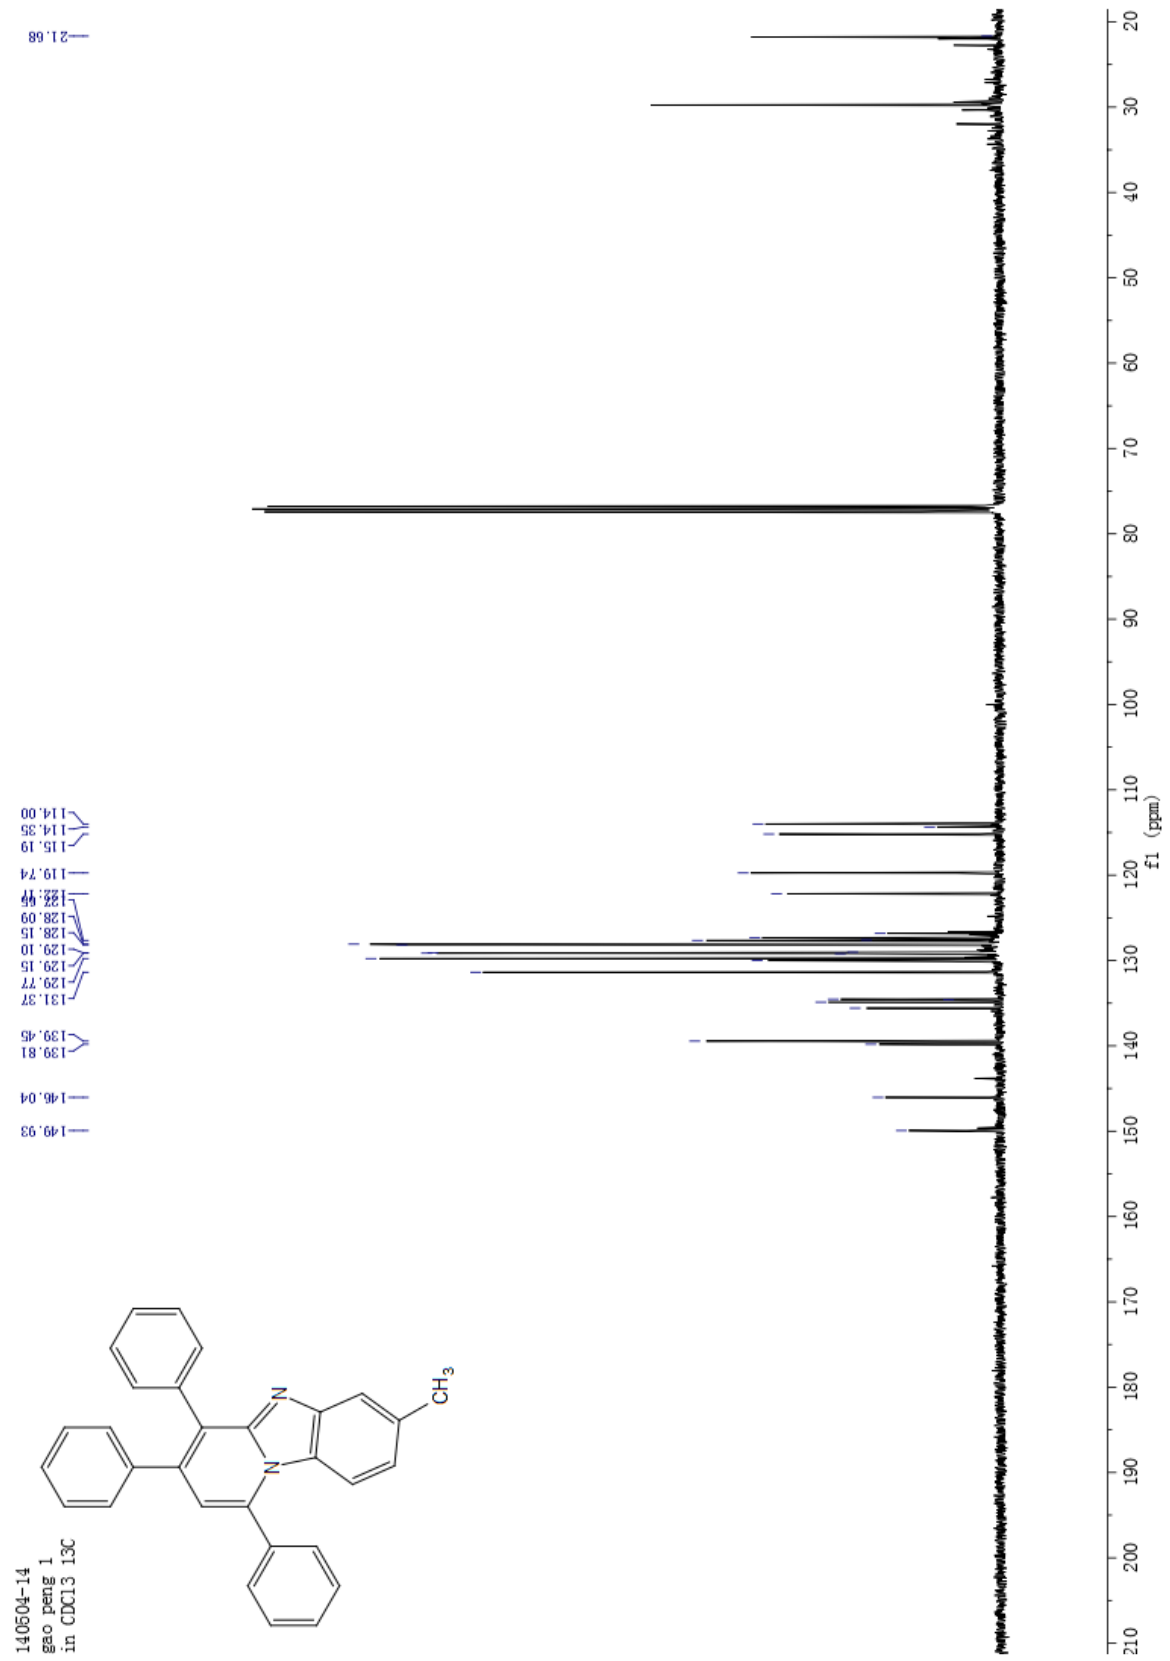

Compound 2c:

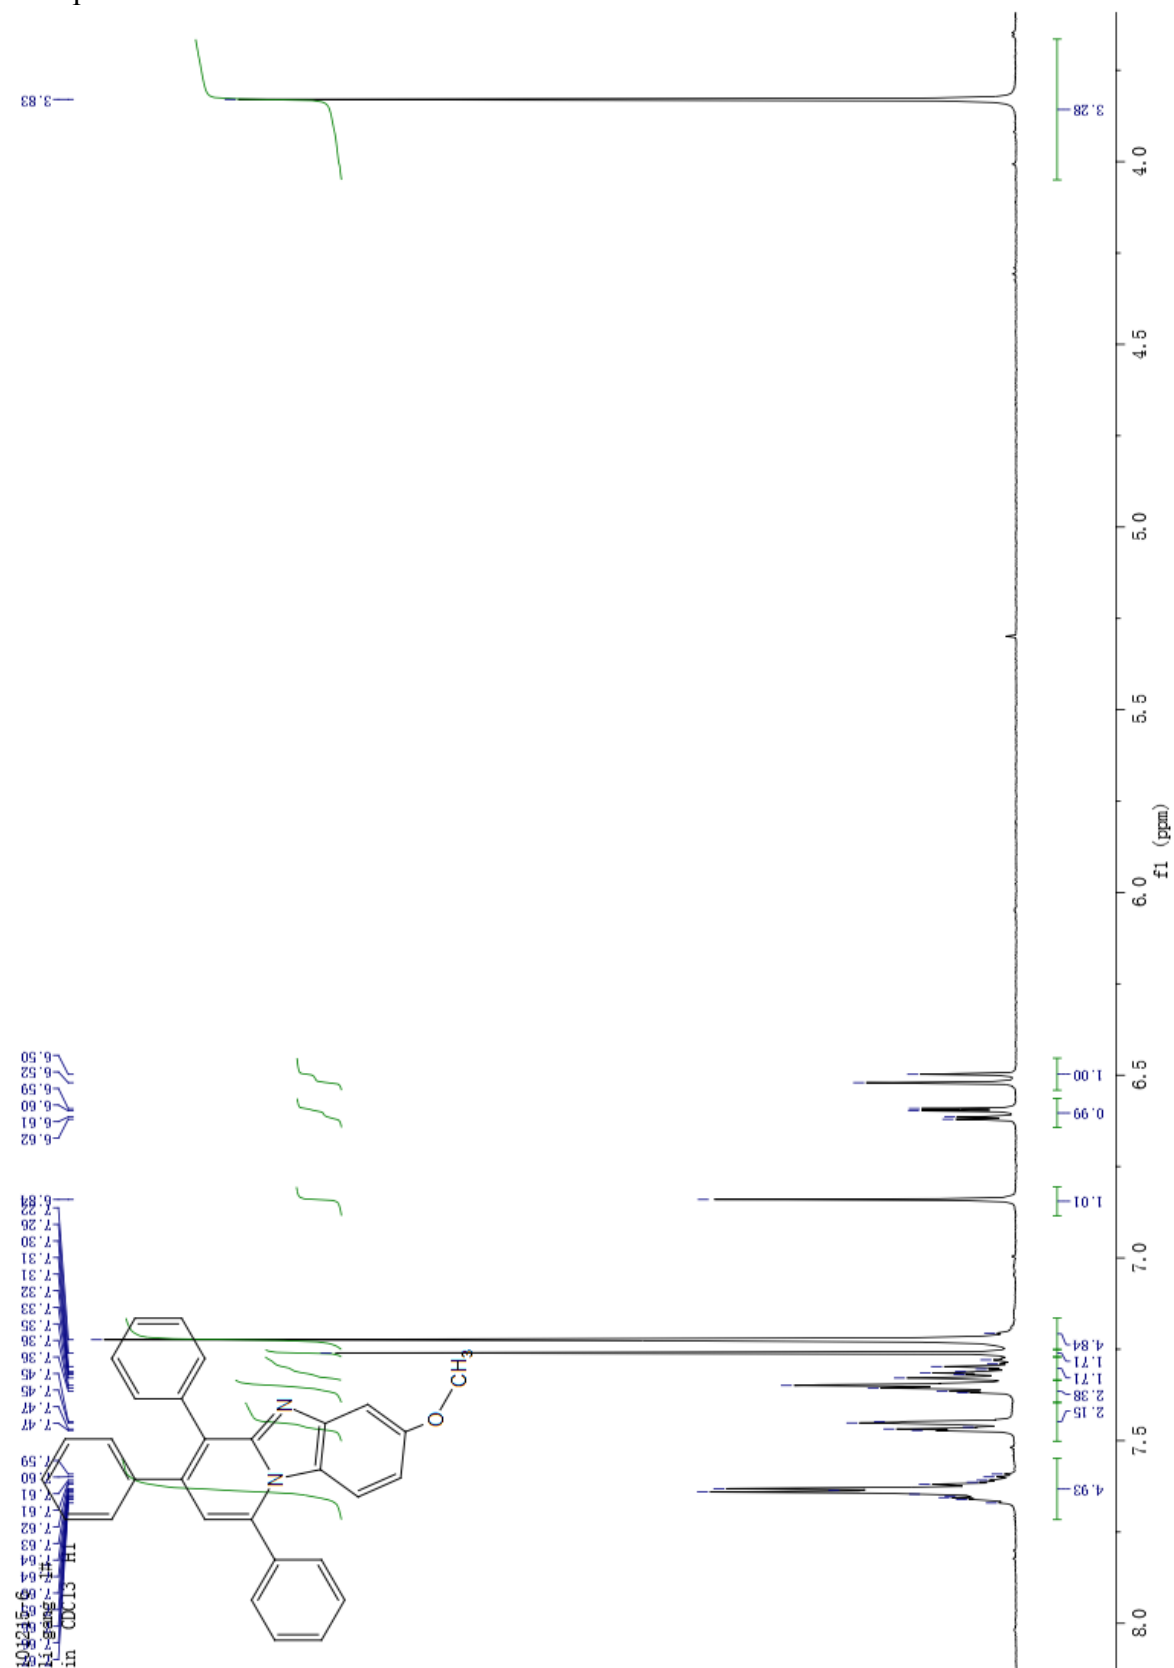

Compound 2c:

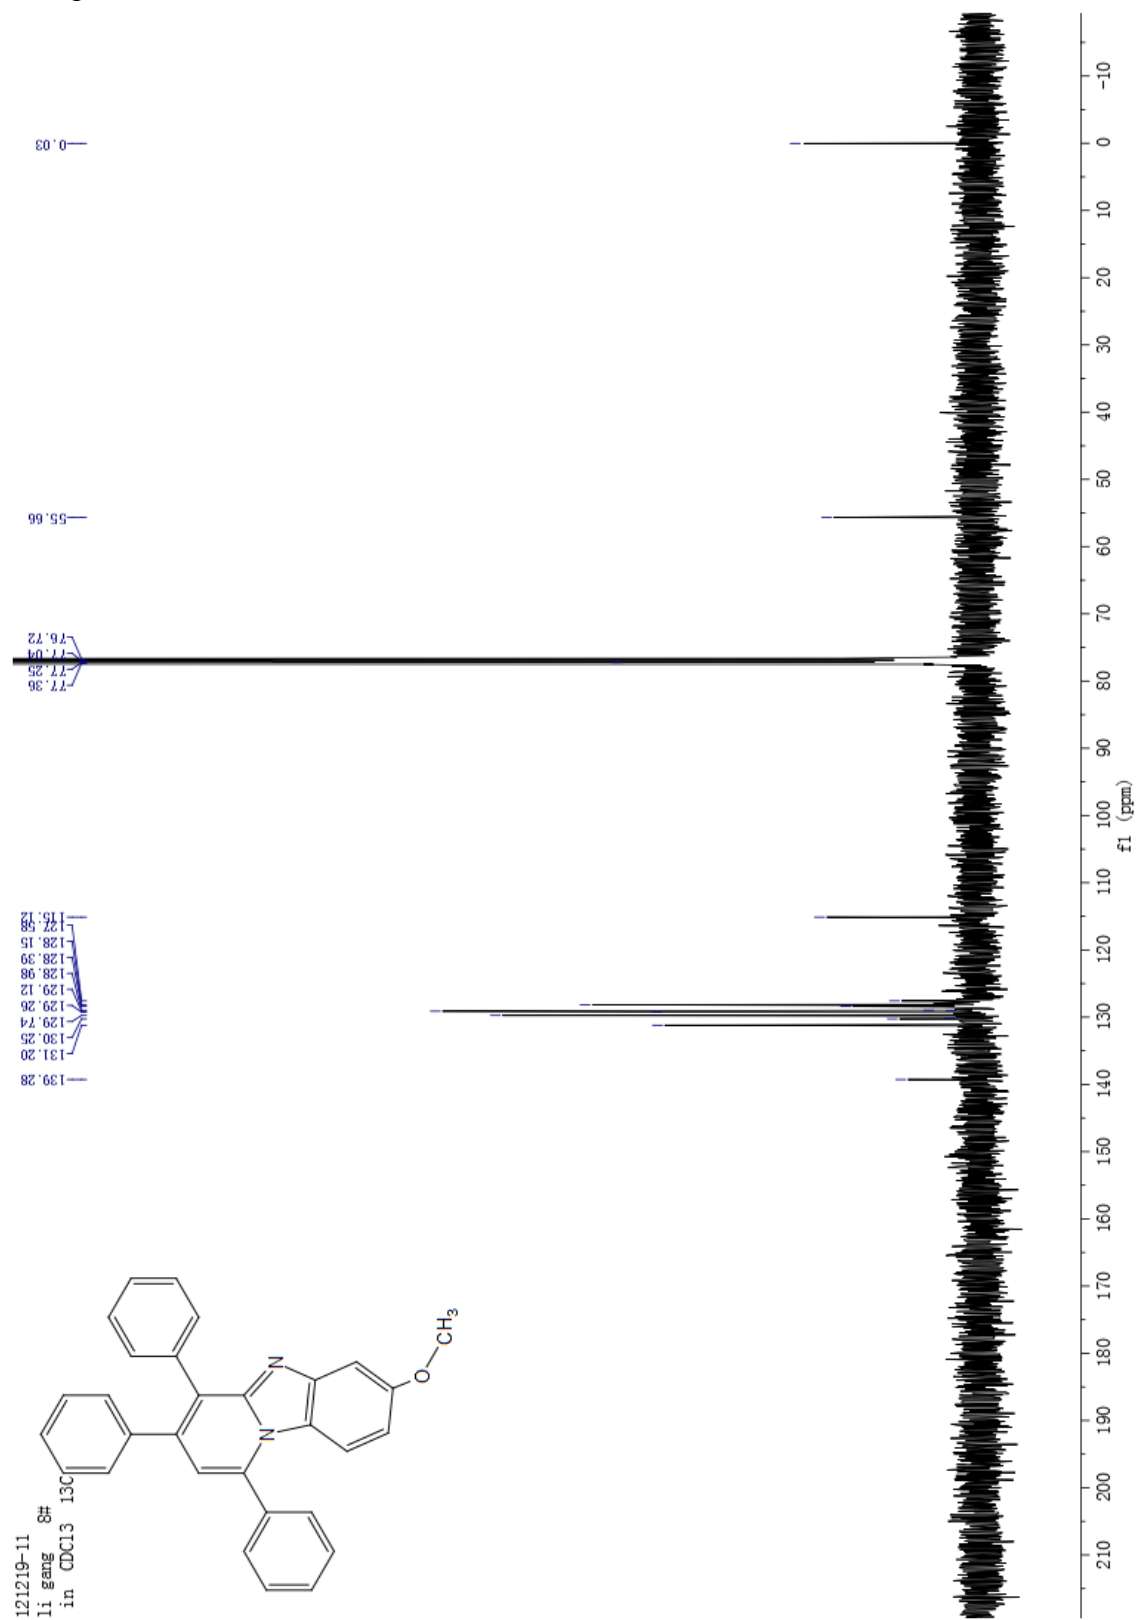



Compound 2d:

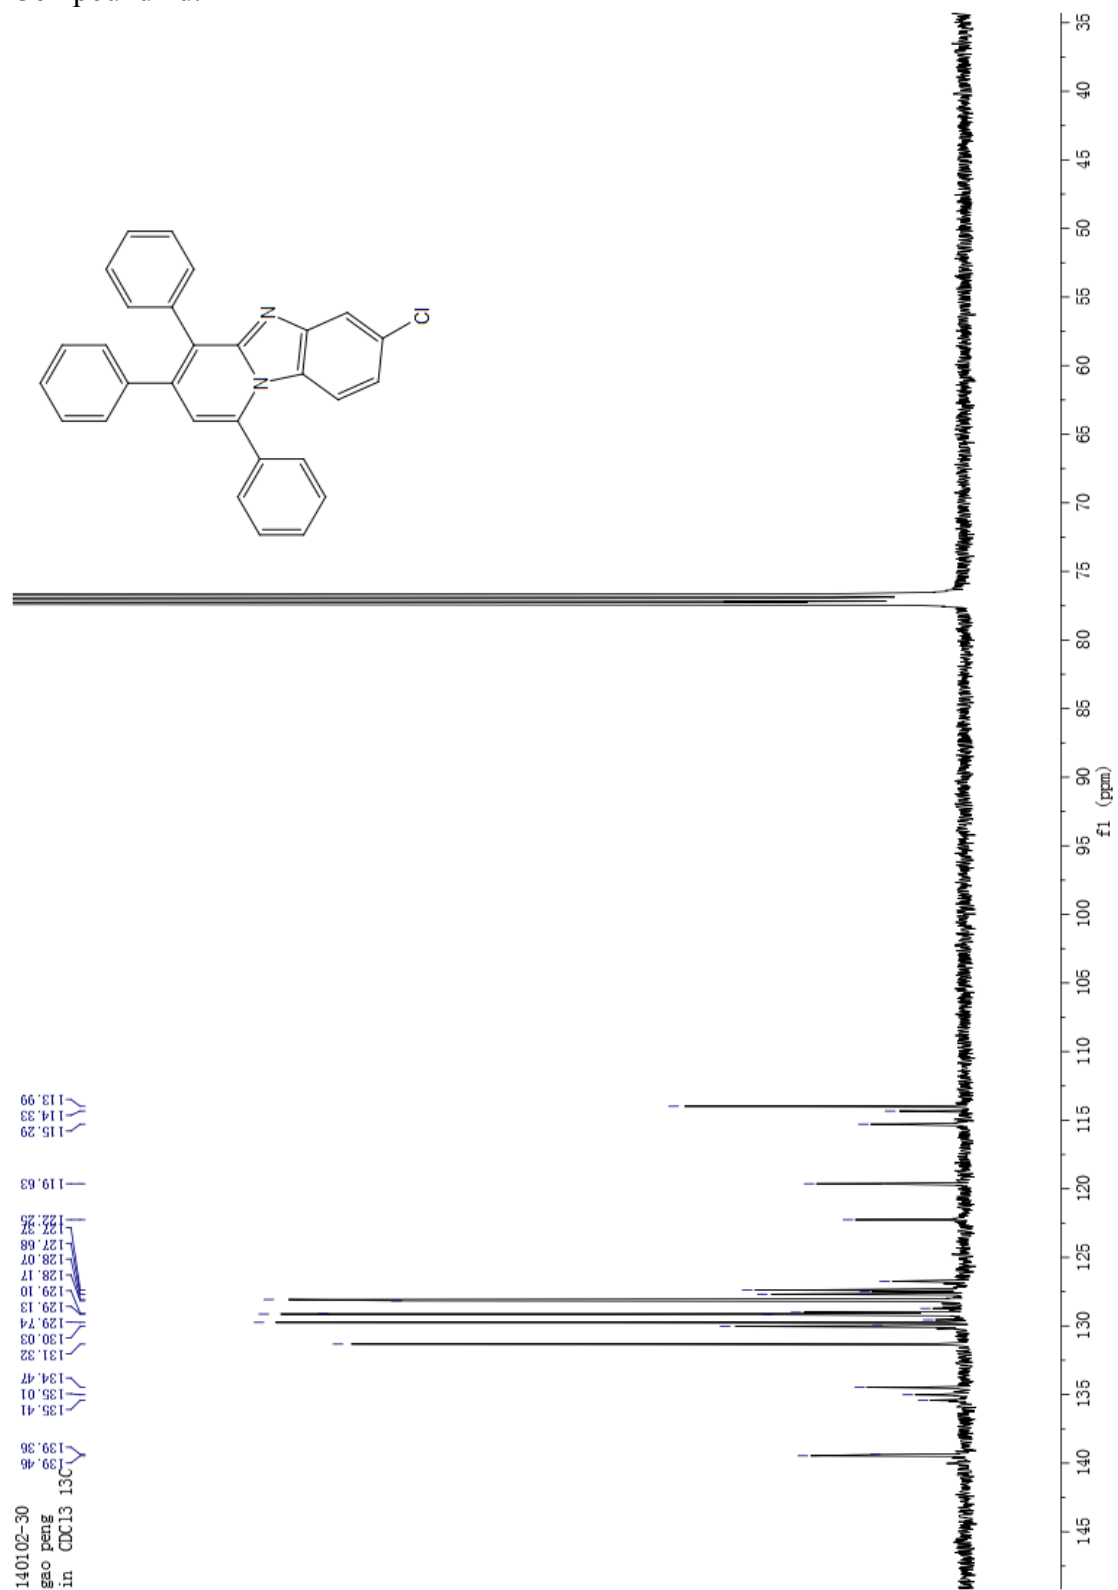

Compound 2e:

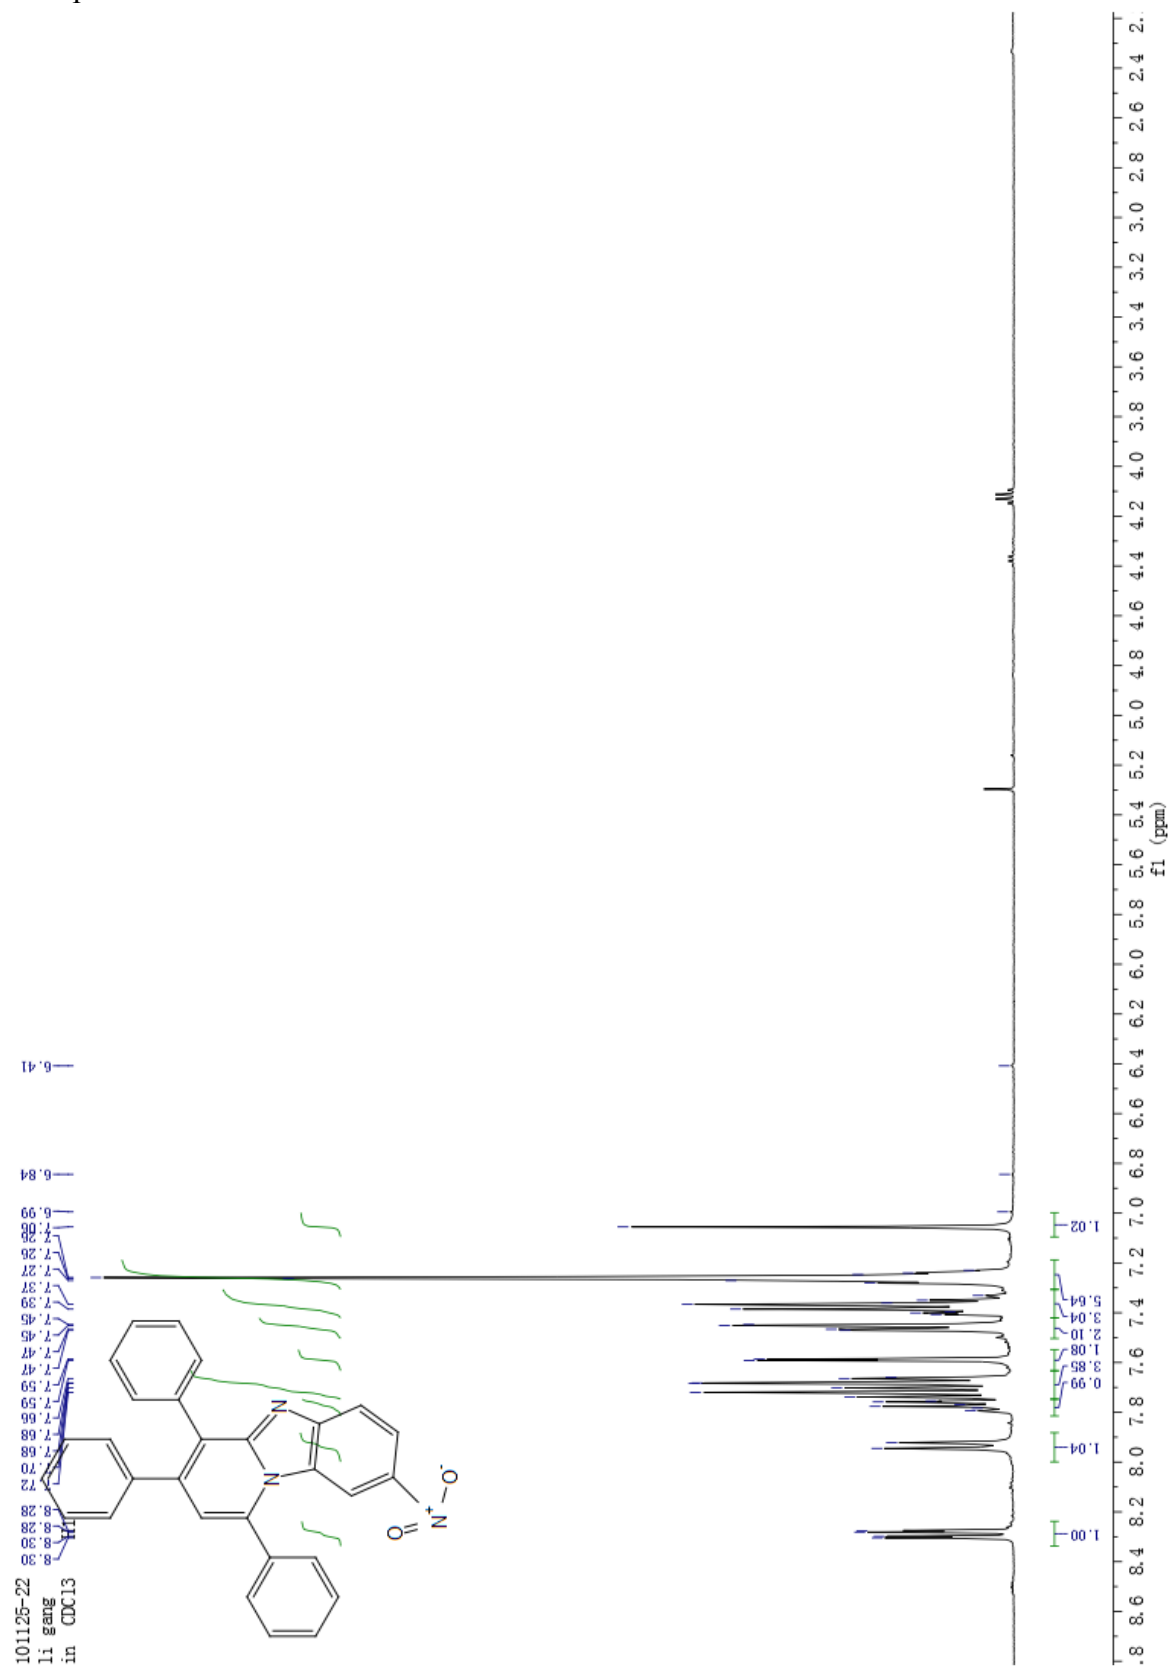



Compound 2e:

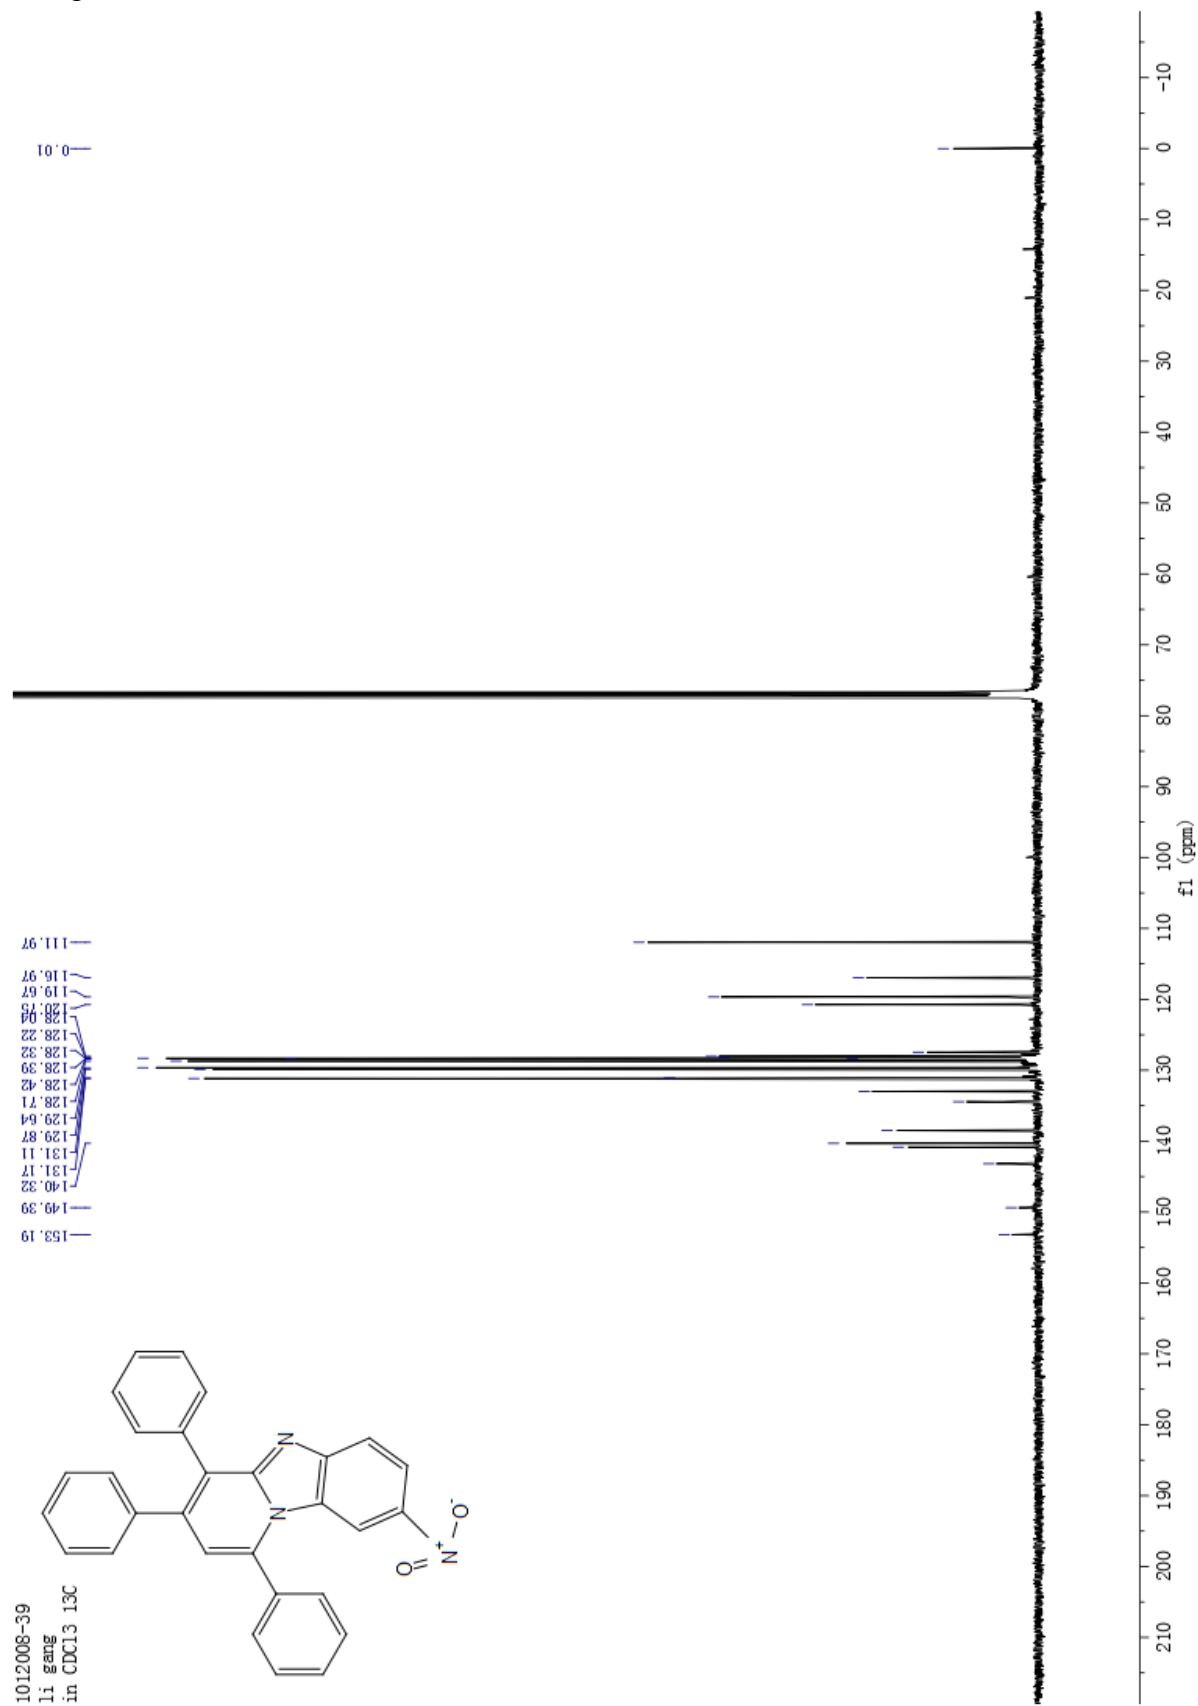

Compound 2f:

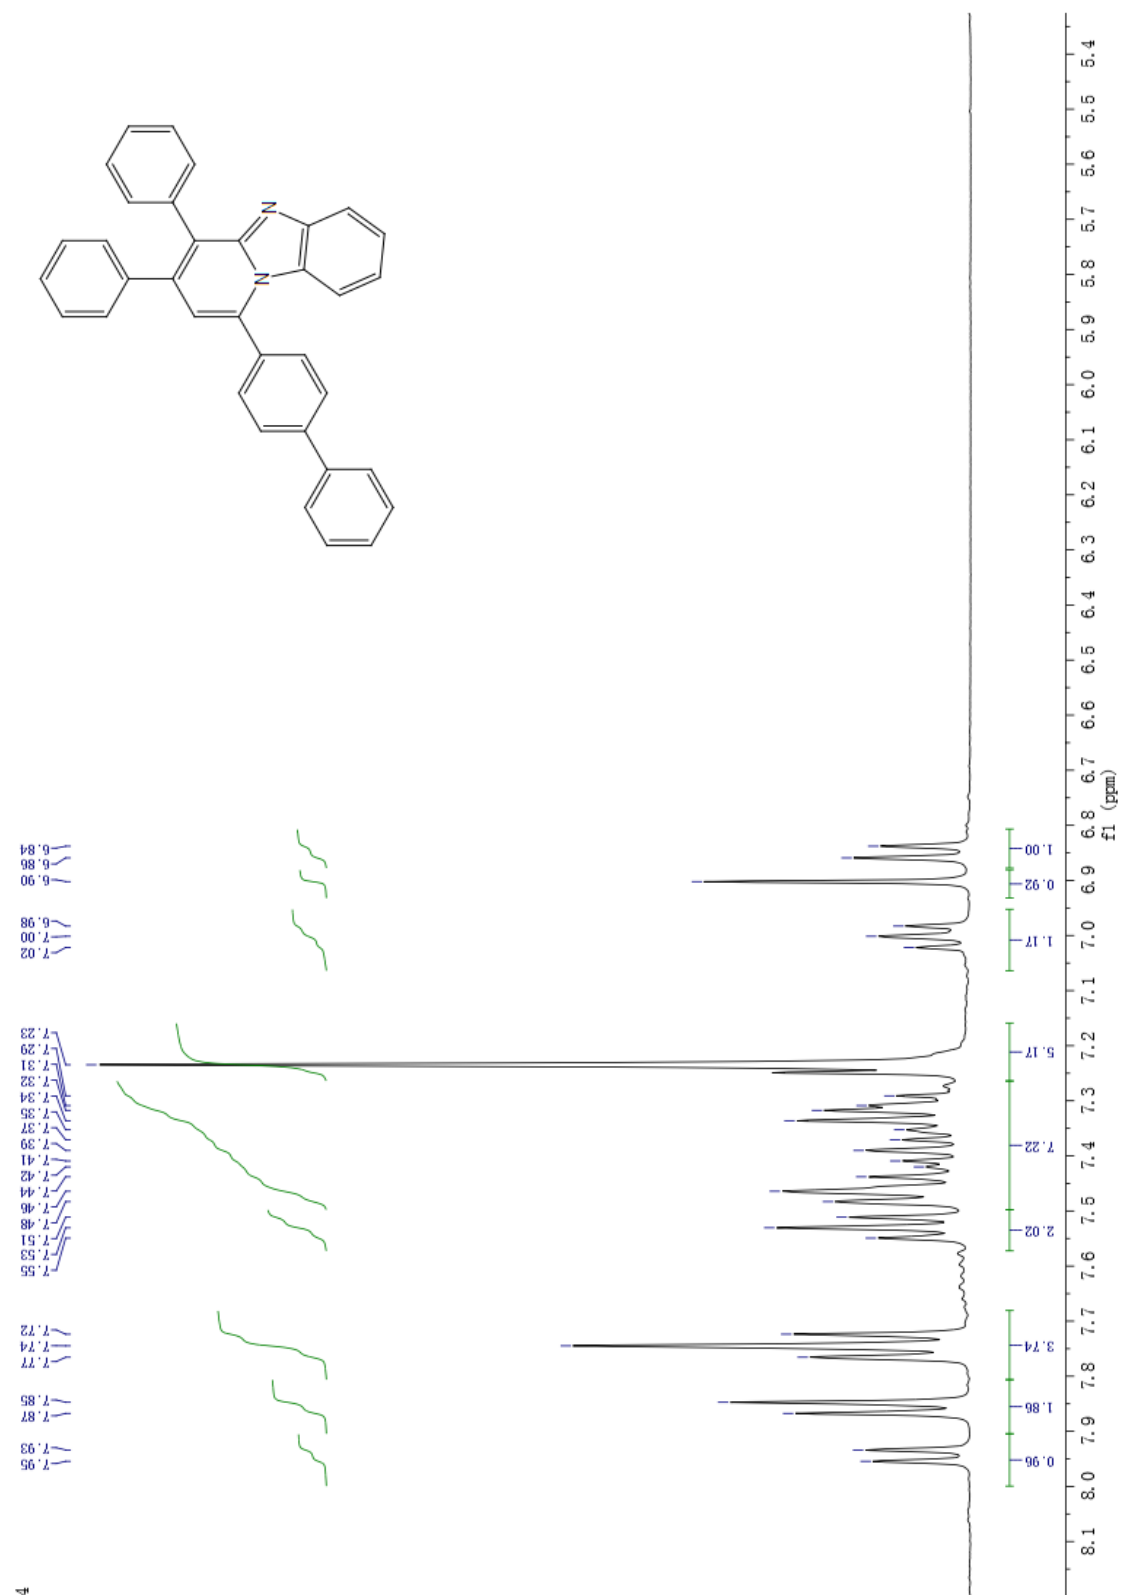

Compound 2f:

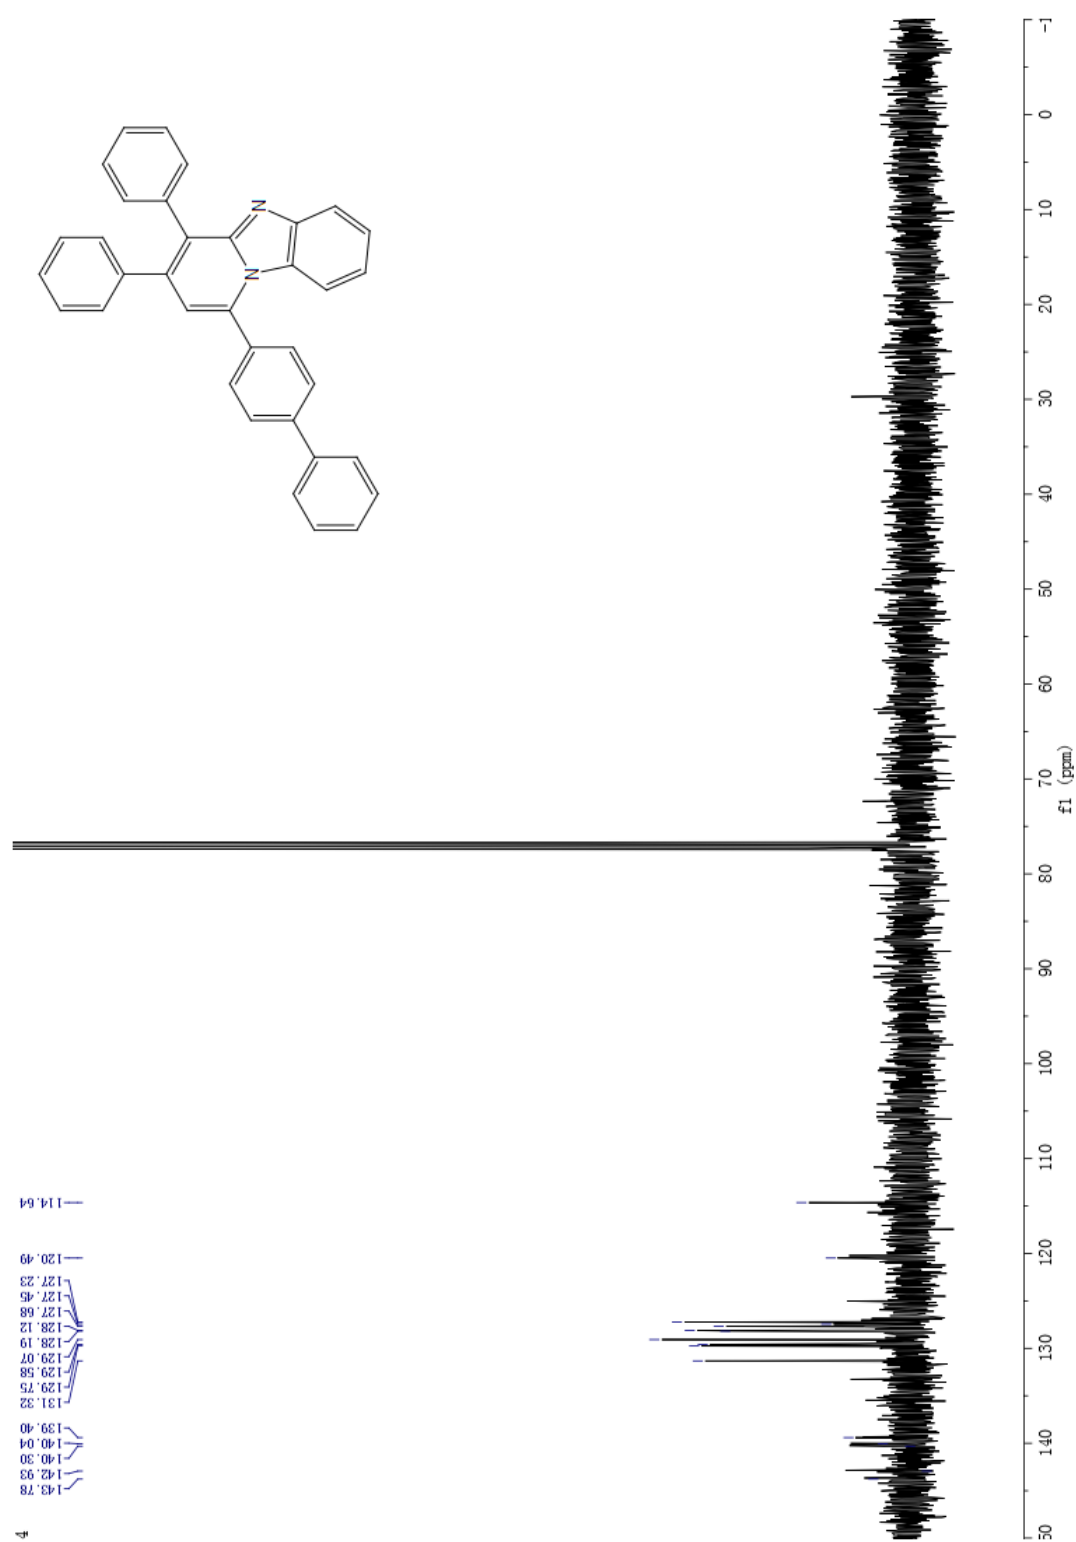

Compound 2m:

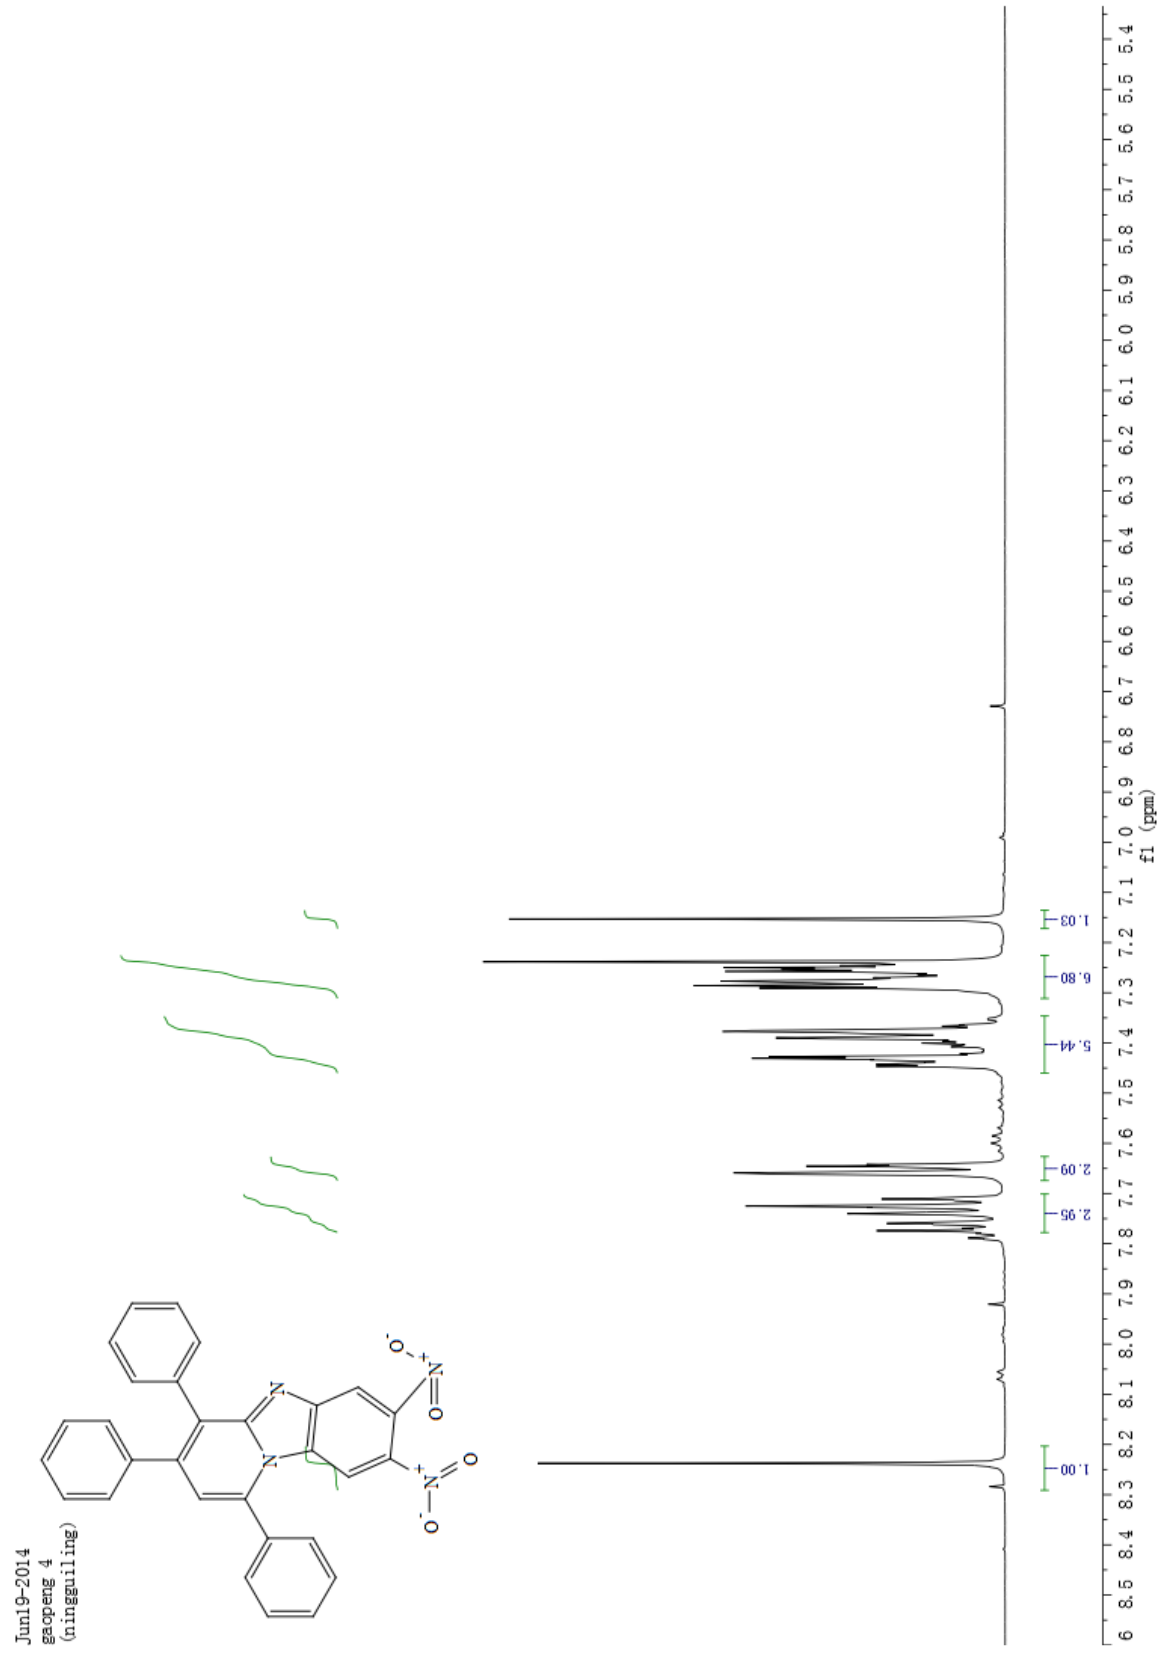

Compound 2m:

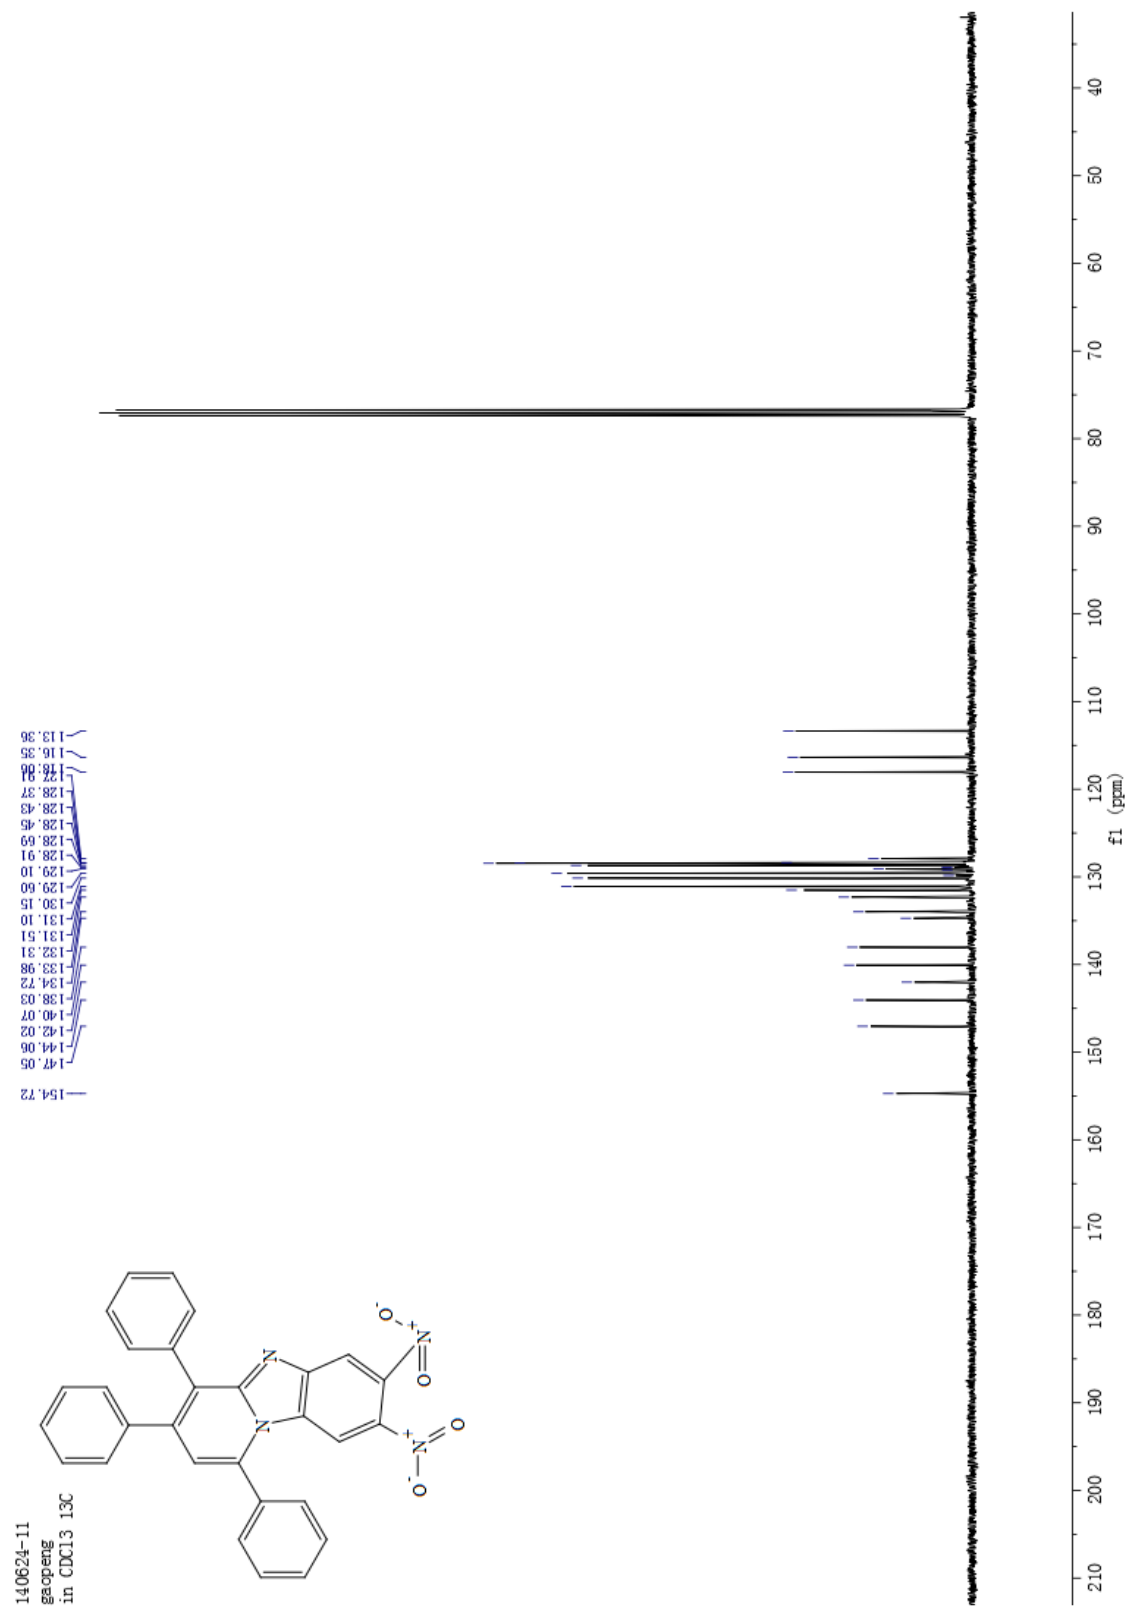

Compound 2k:

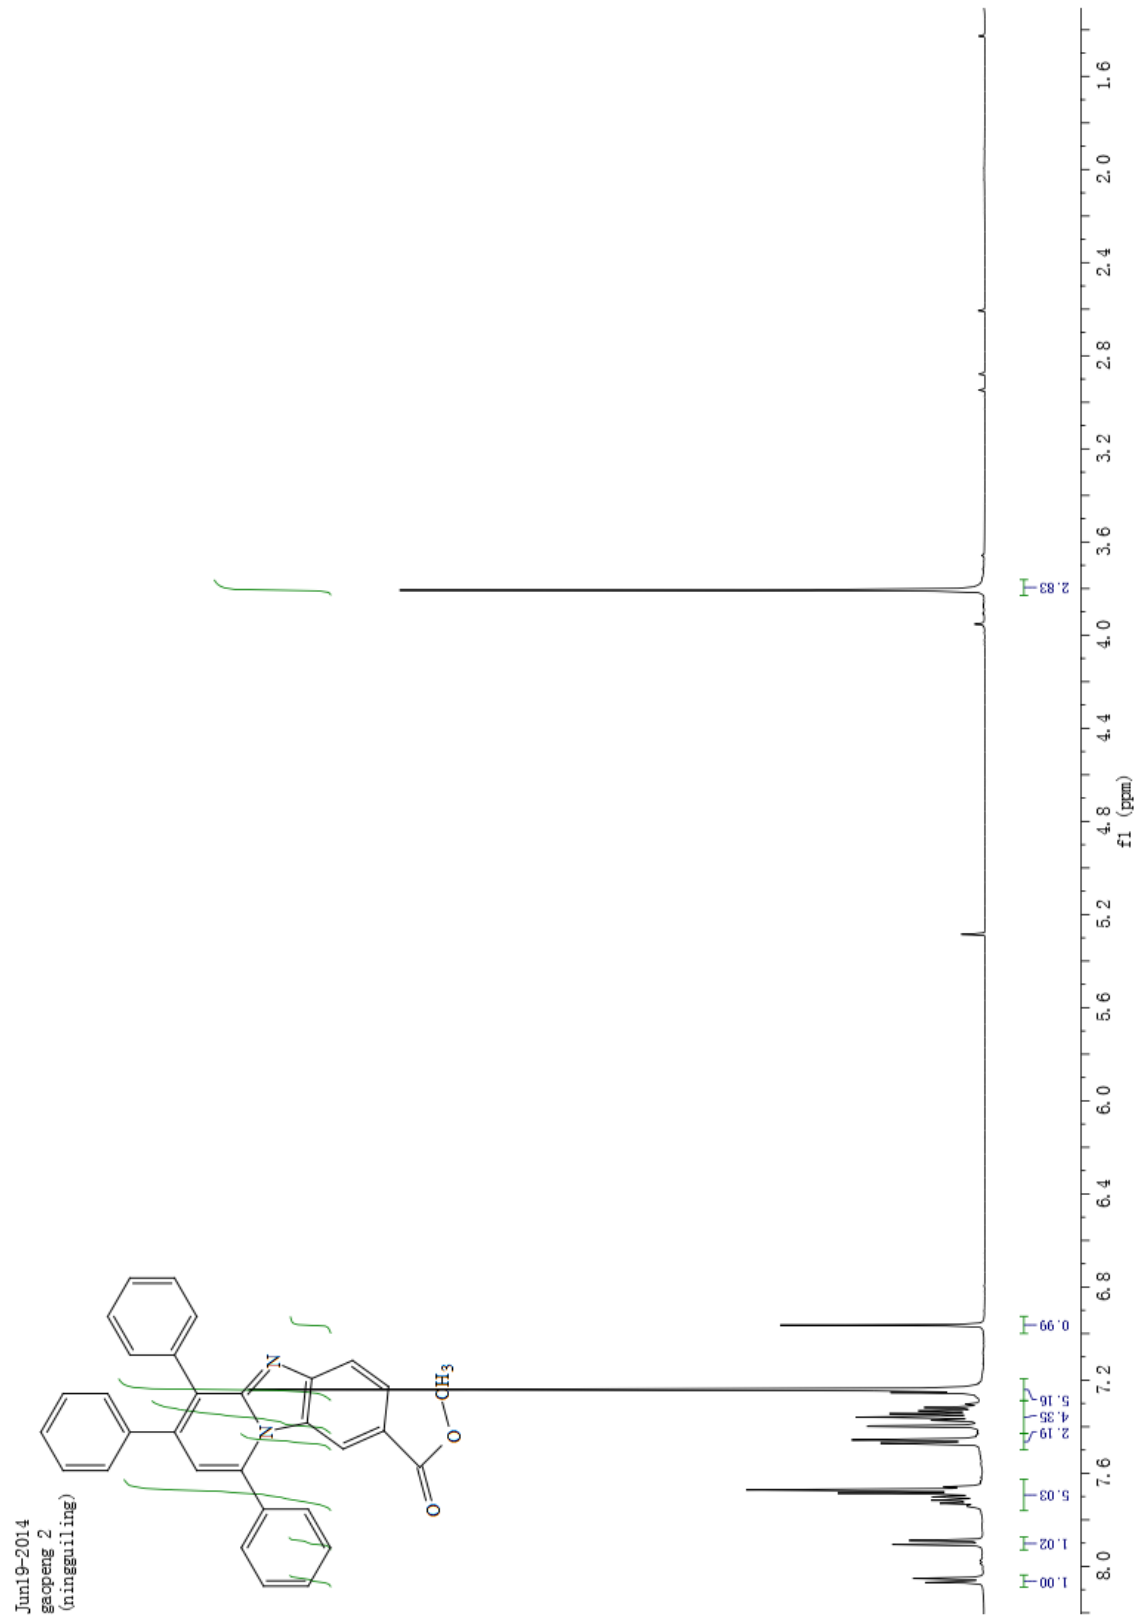



Compound 2g:

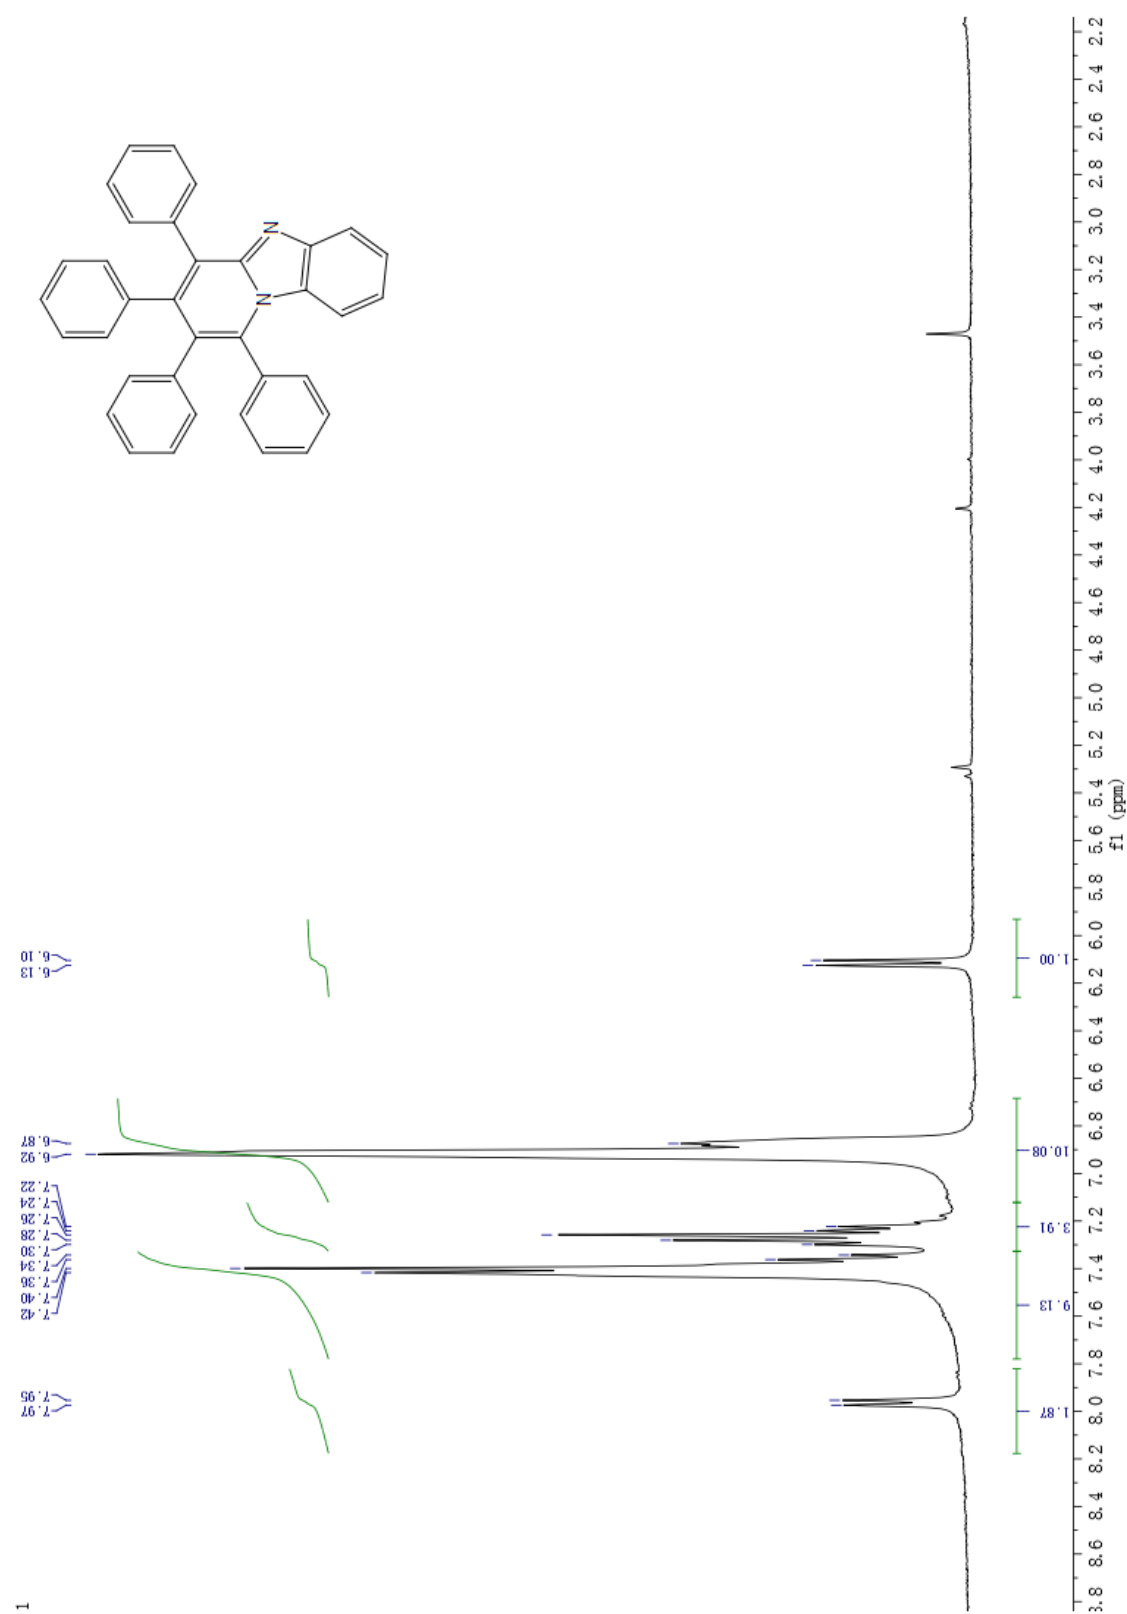



Compound 2g:

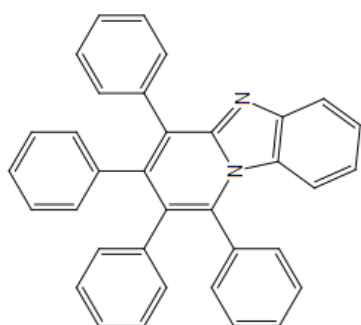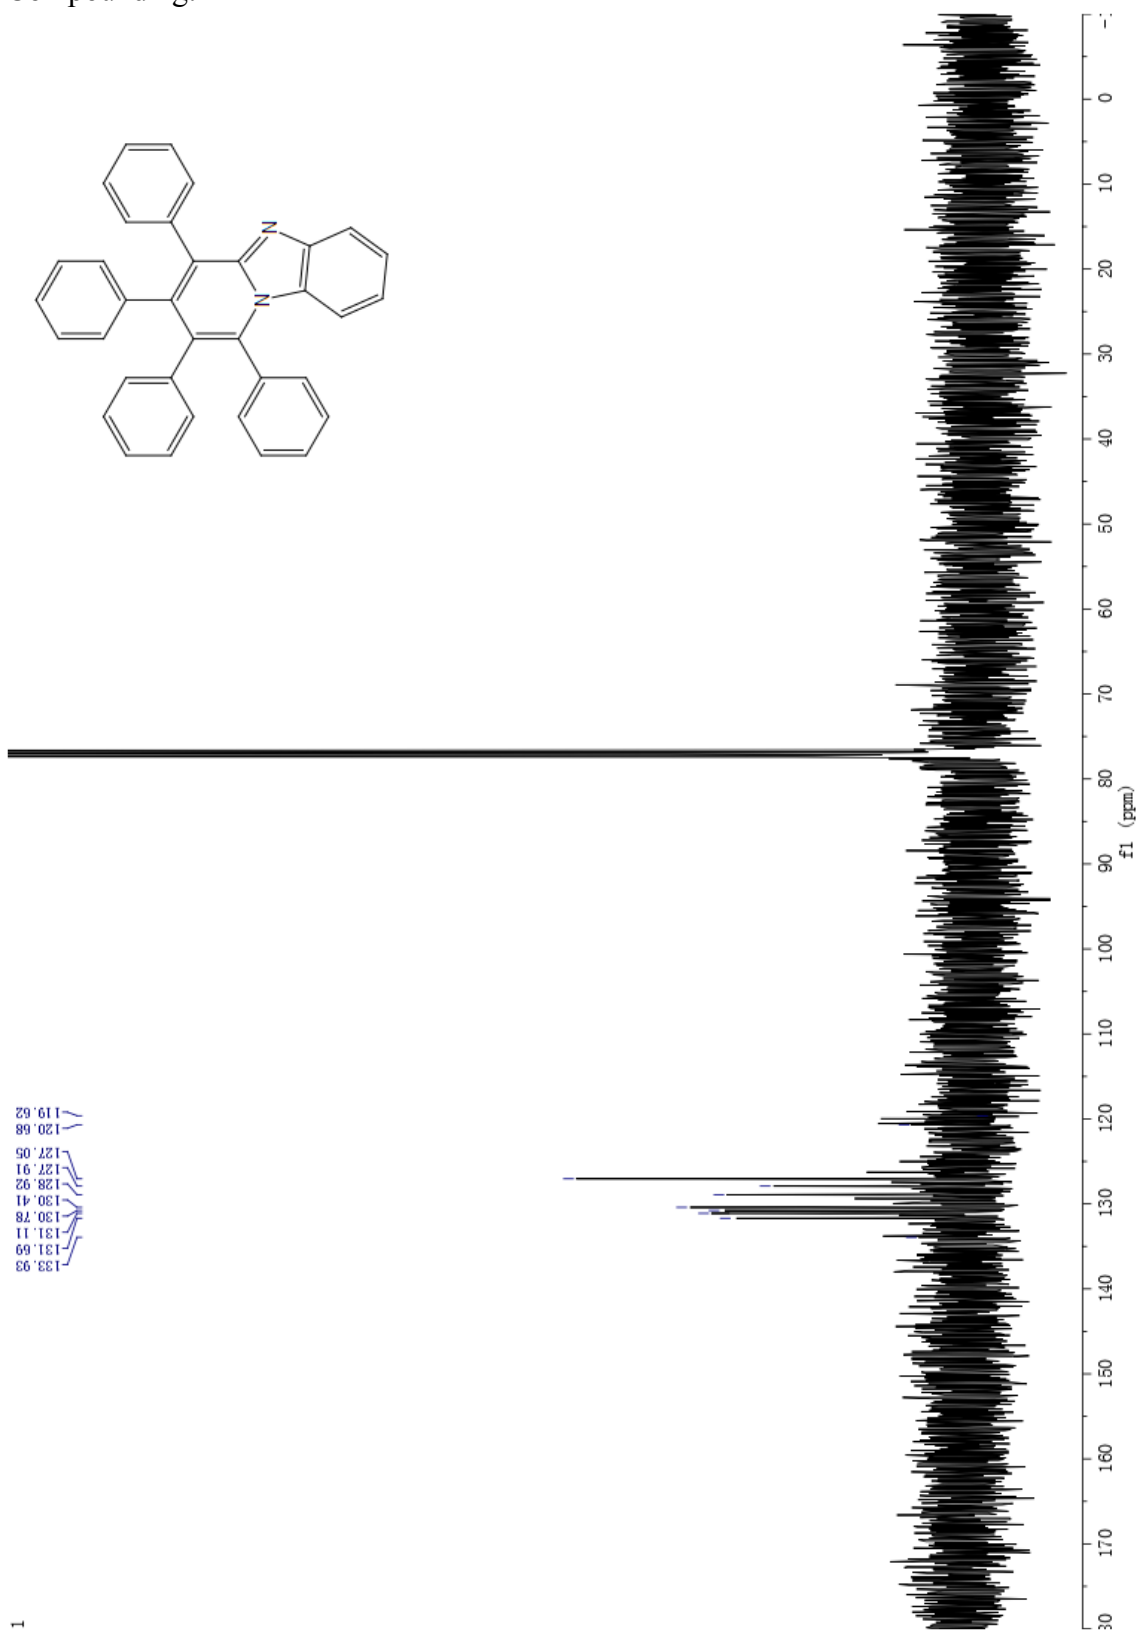

Compound 2h:

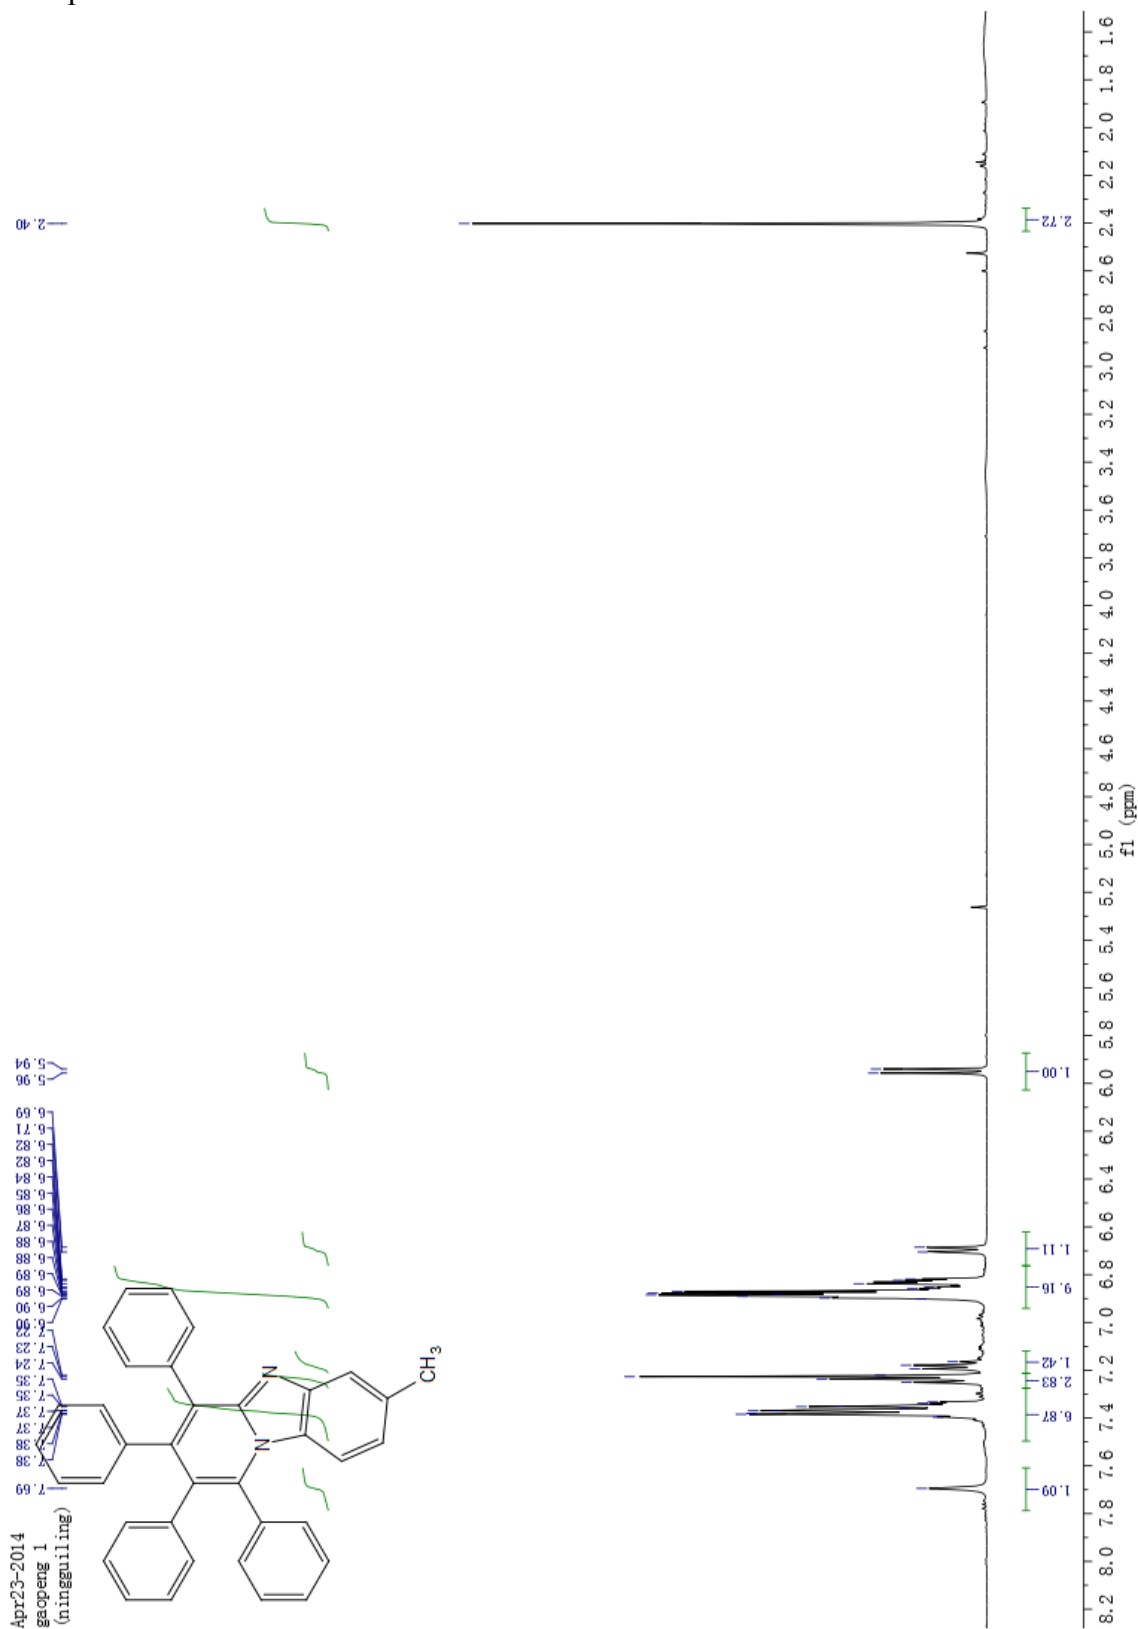

Compound 2h:

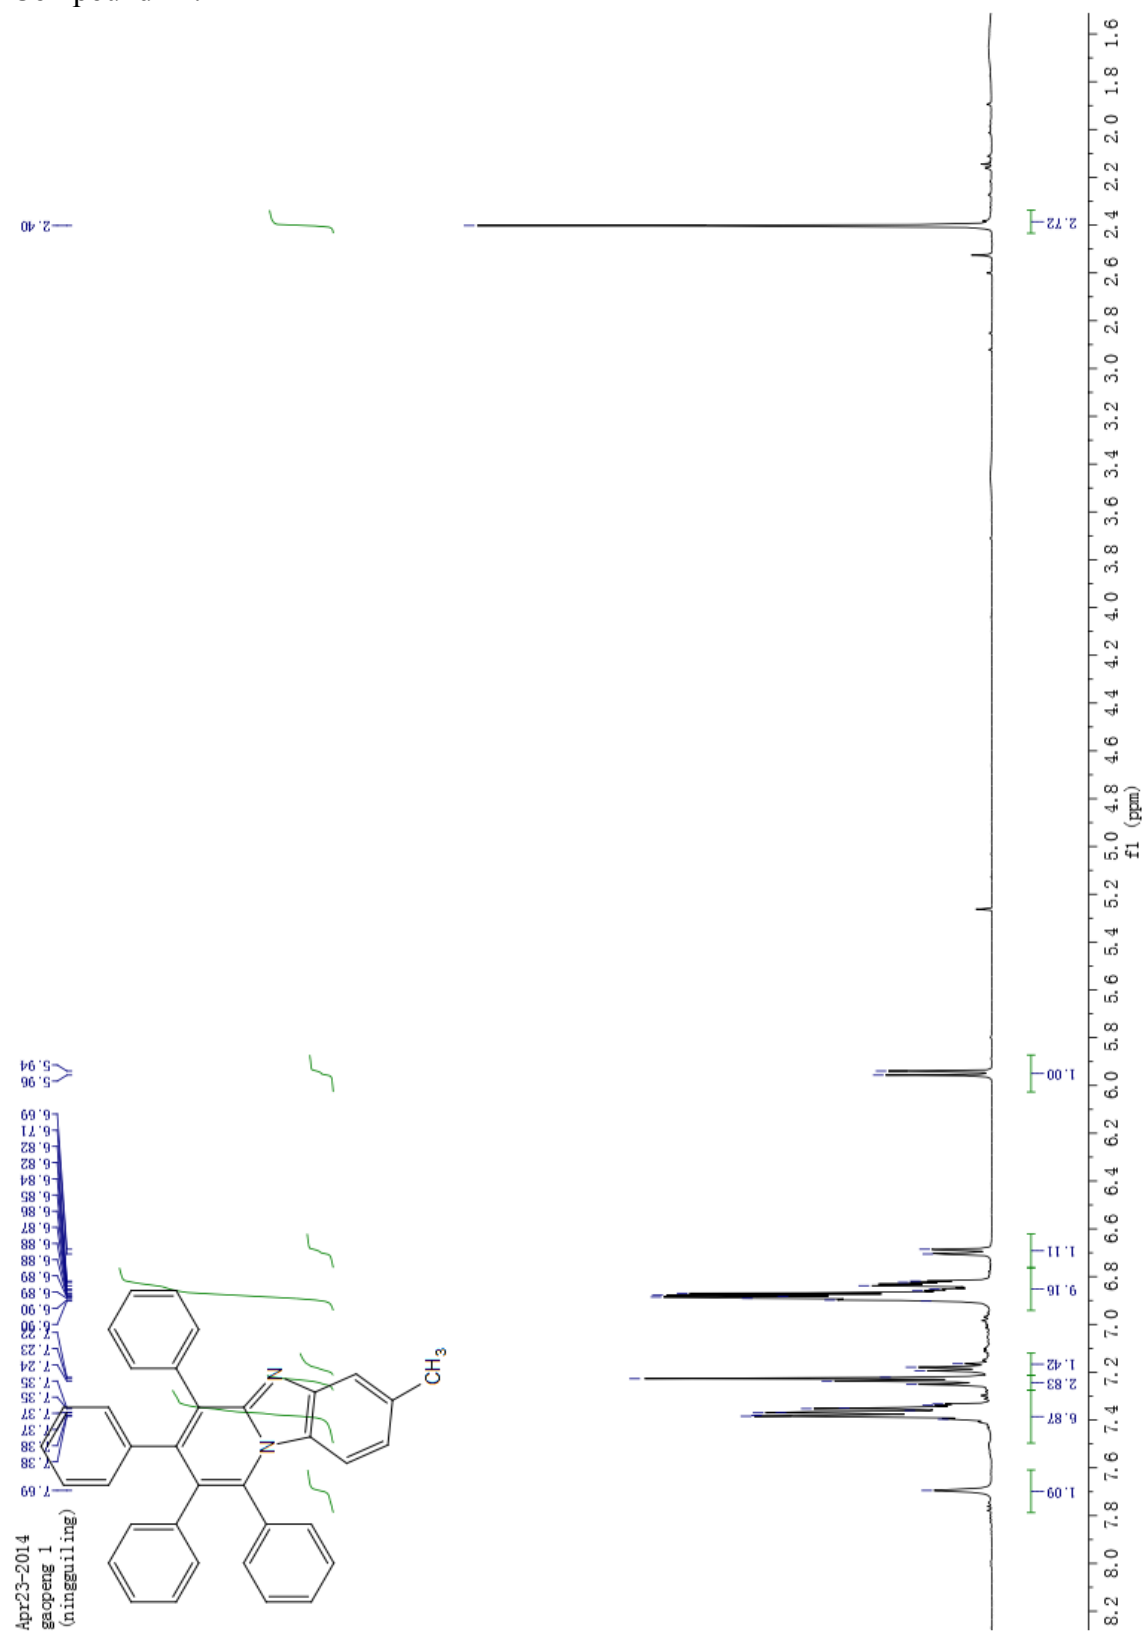

Compound 2i:

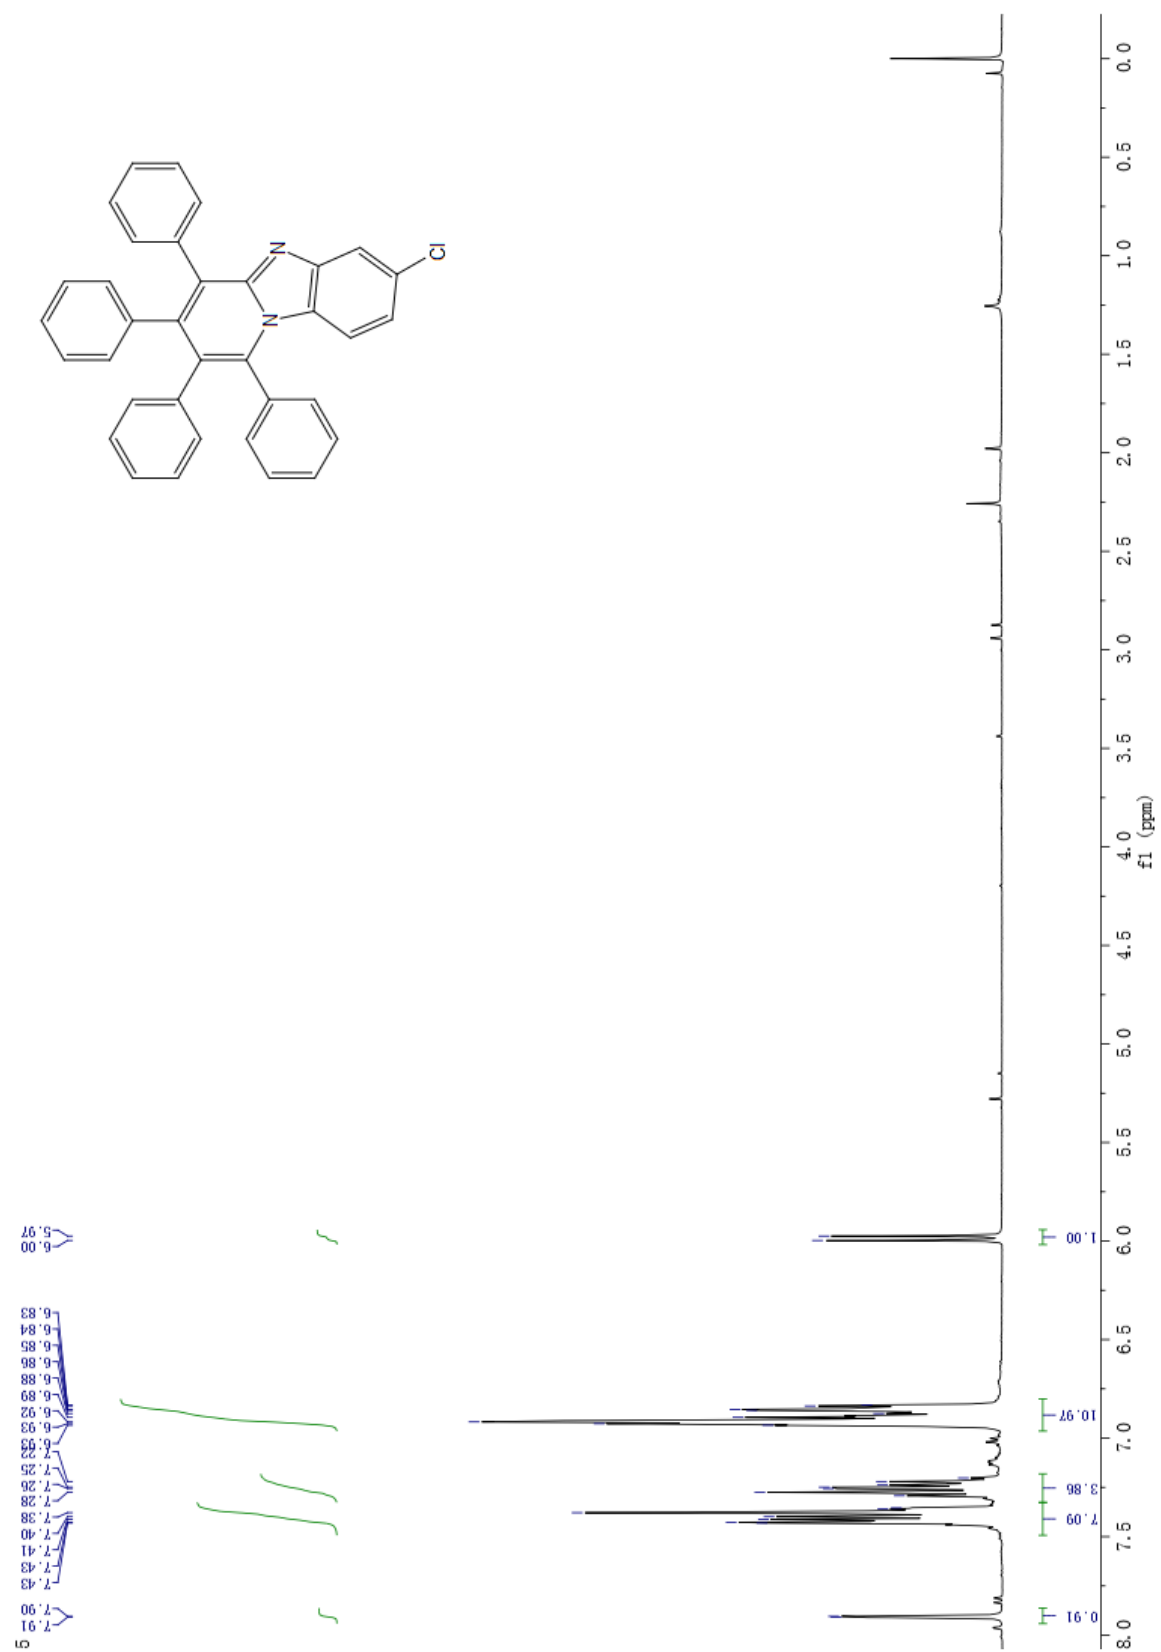

Compound 2i:

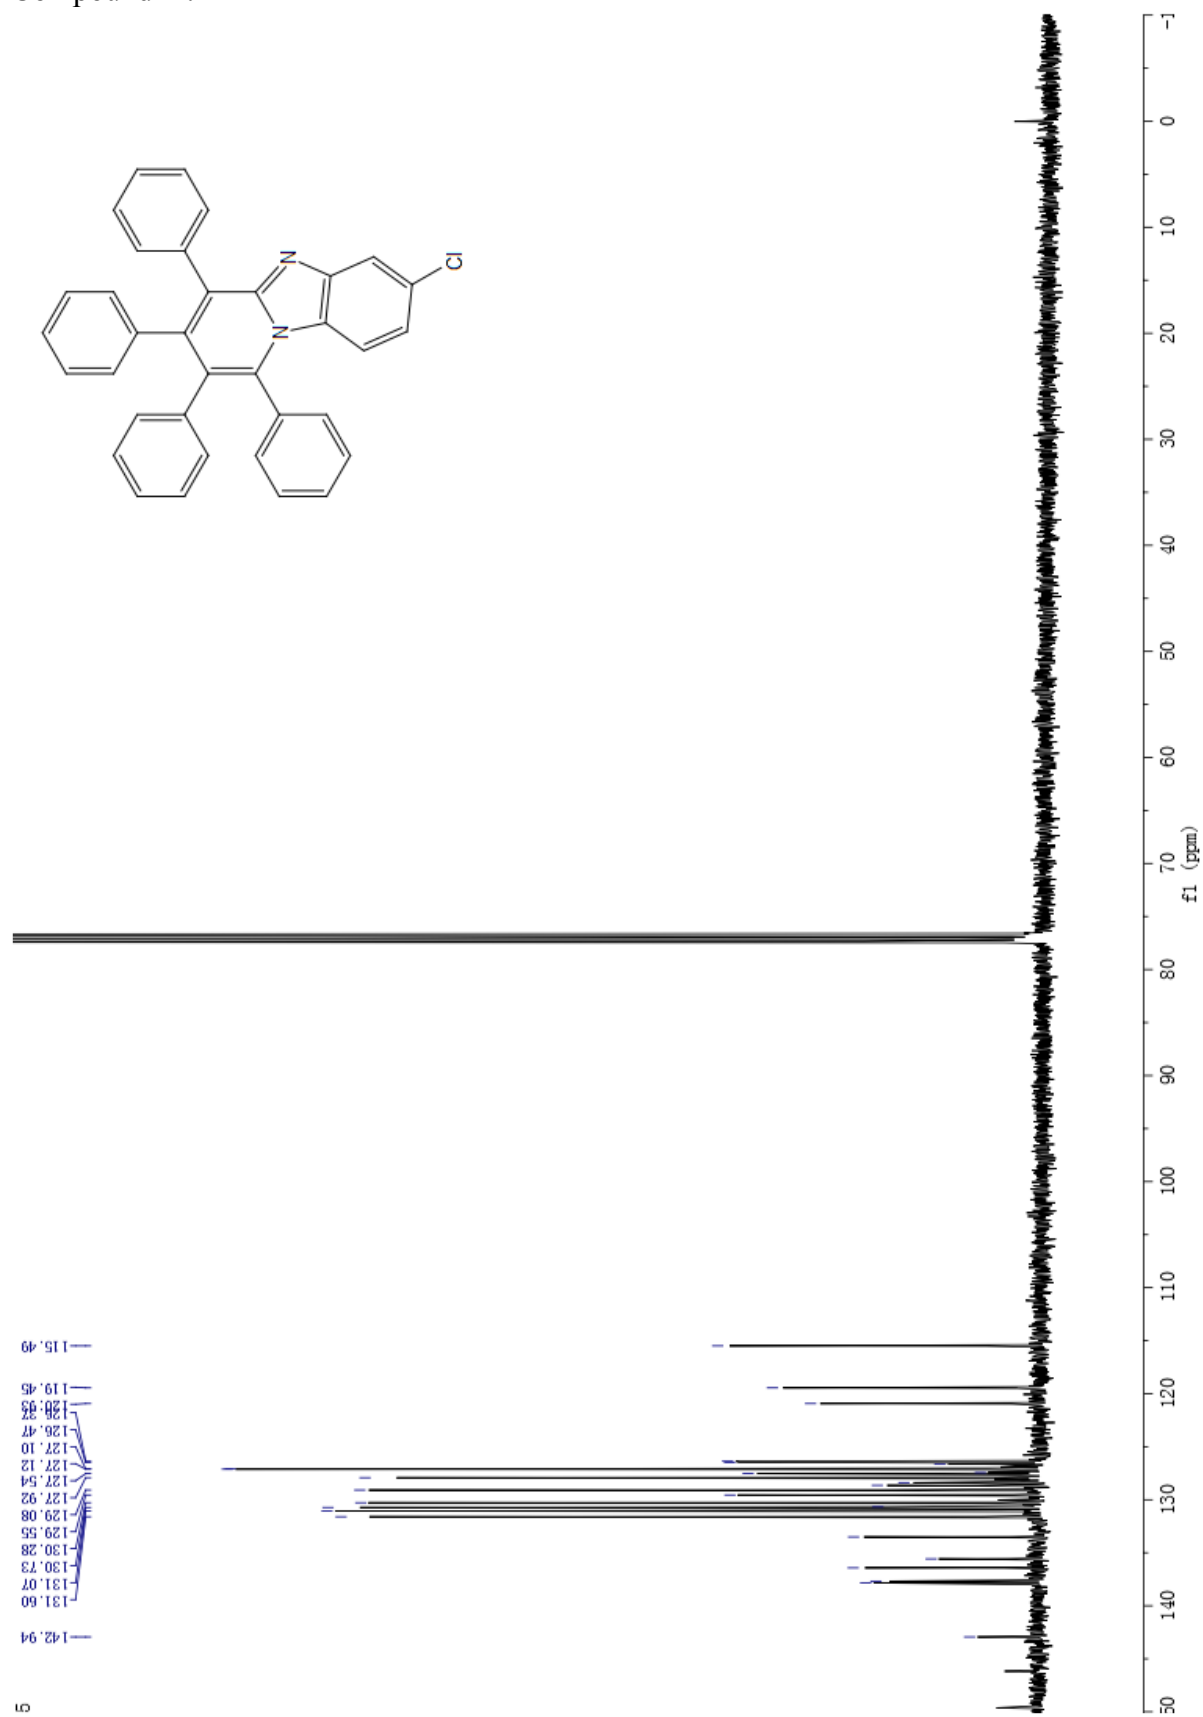

Compound 21:

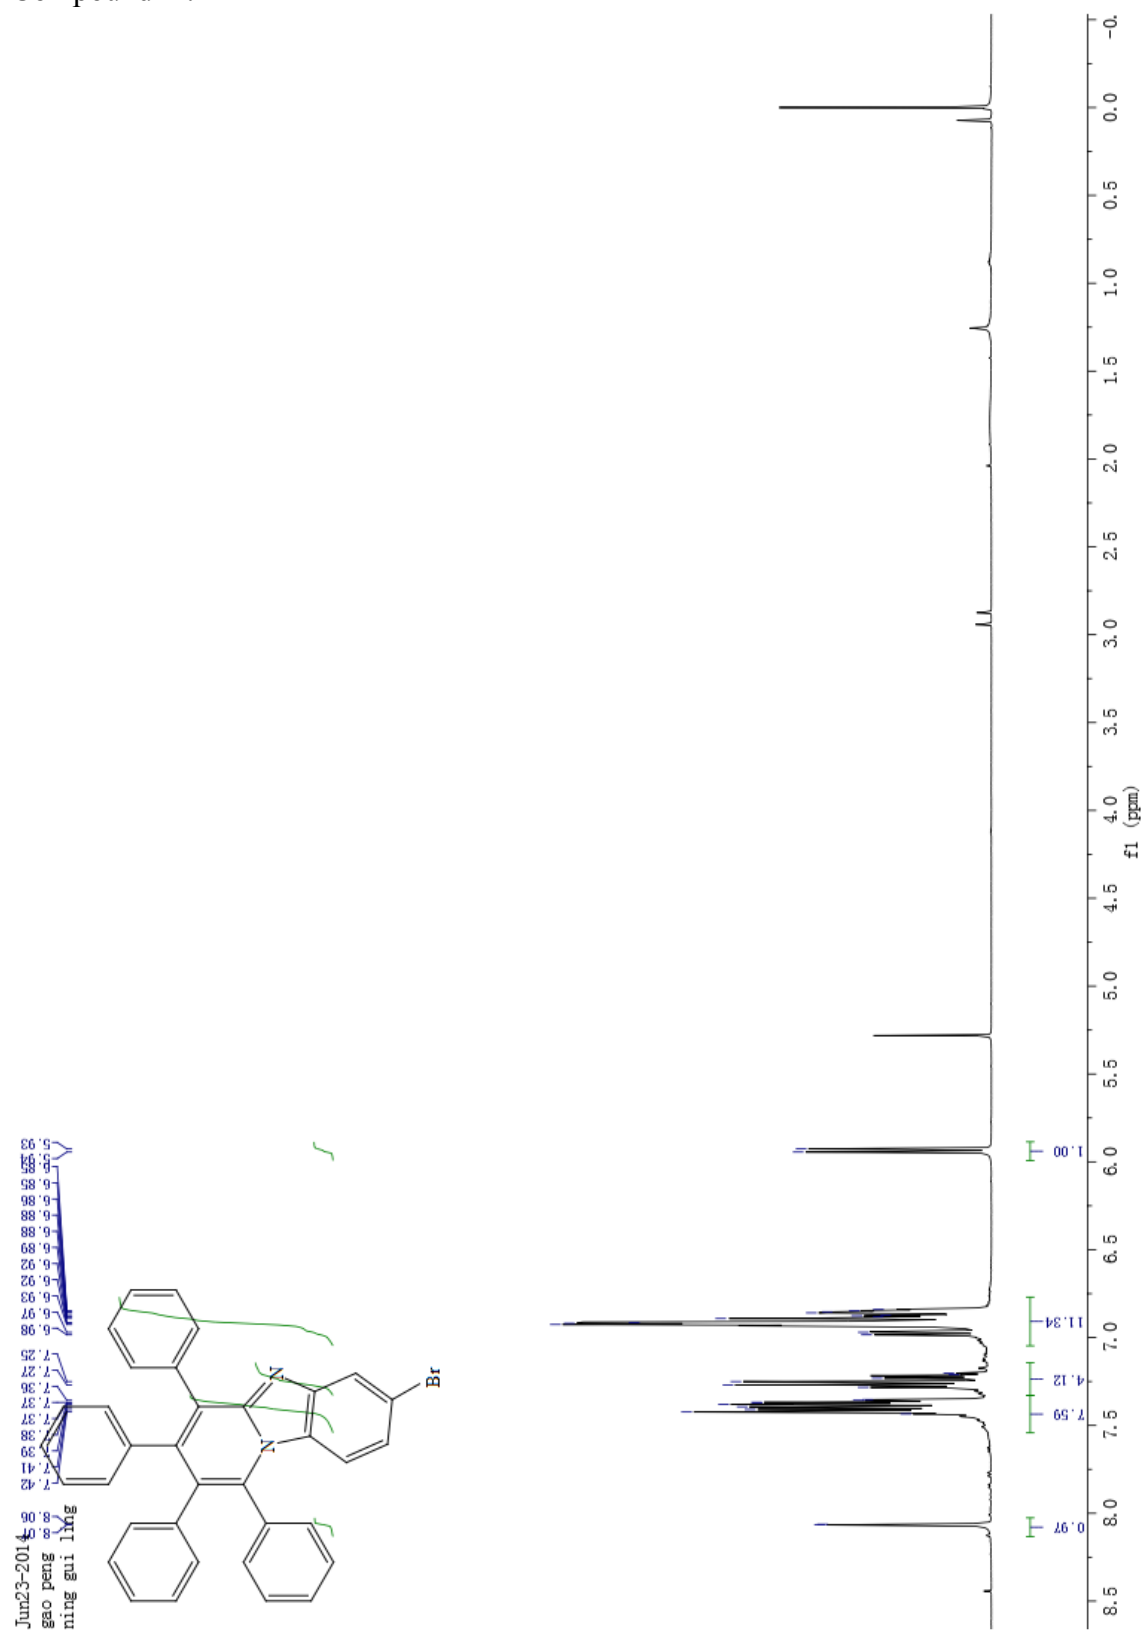

Compound 21:

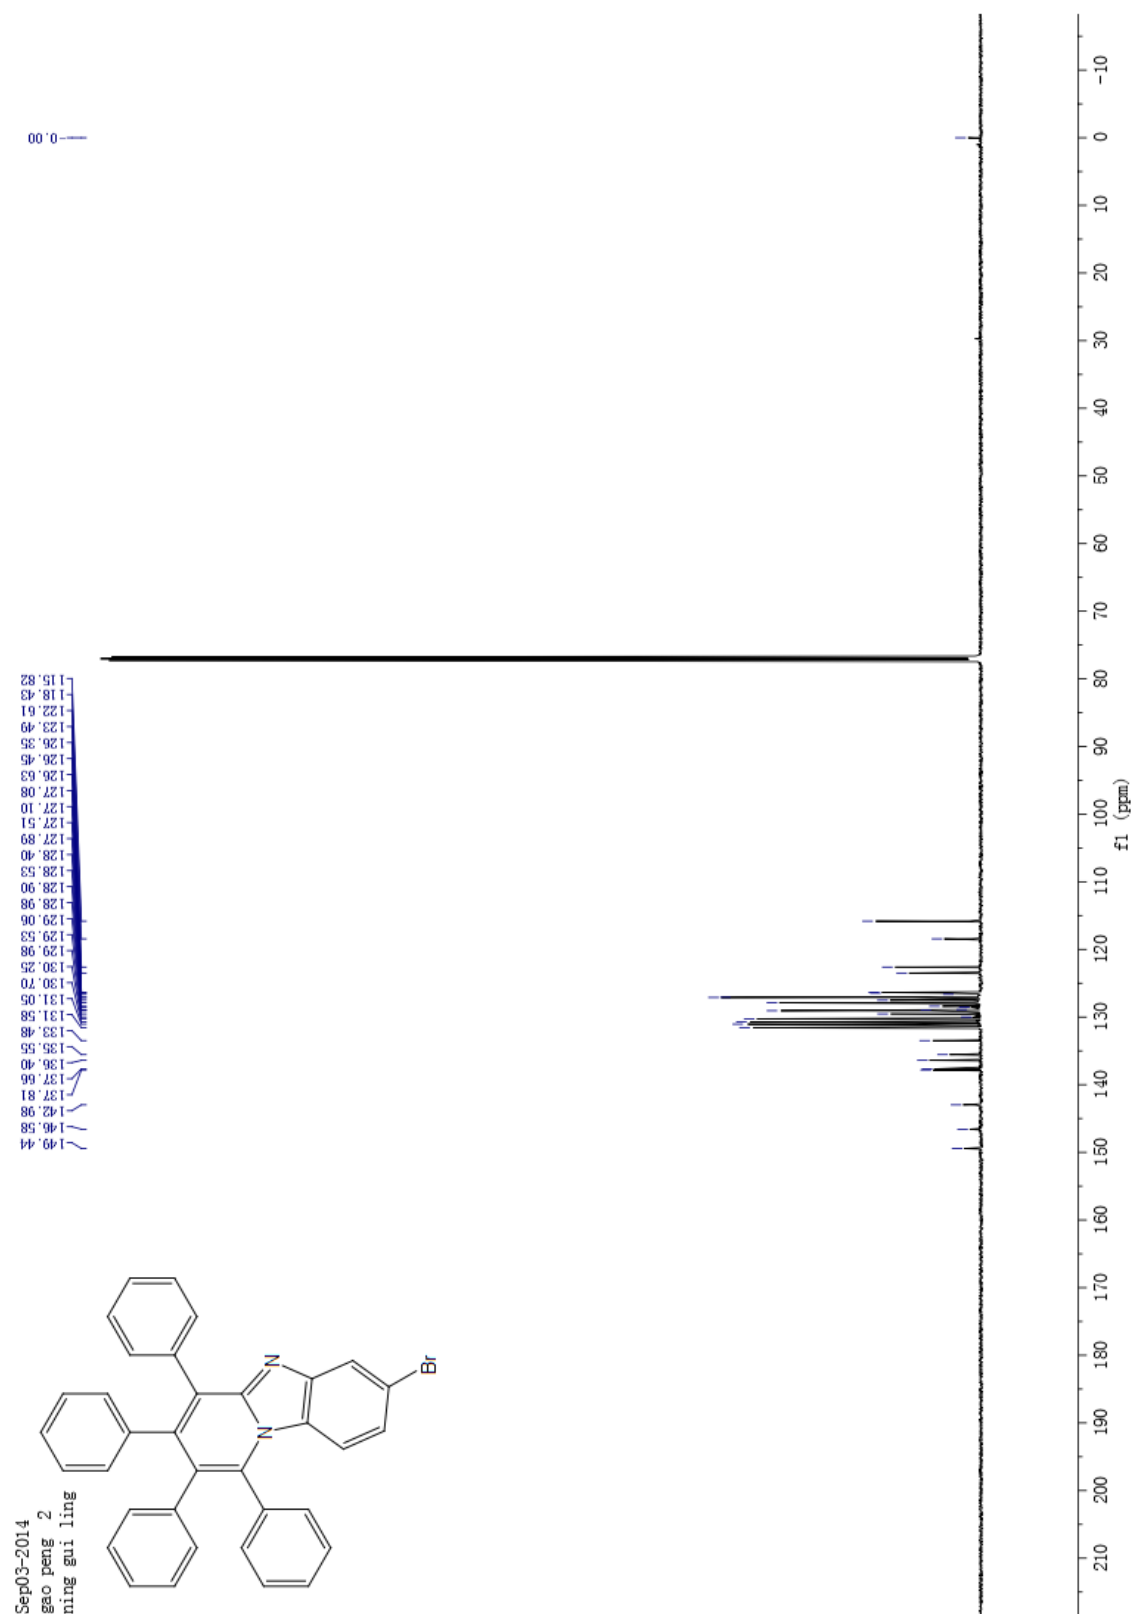

Compound 2p:

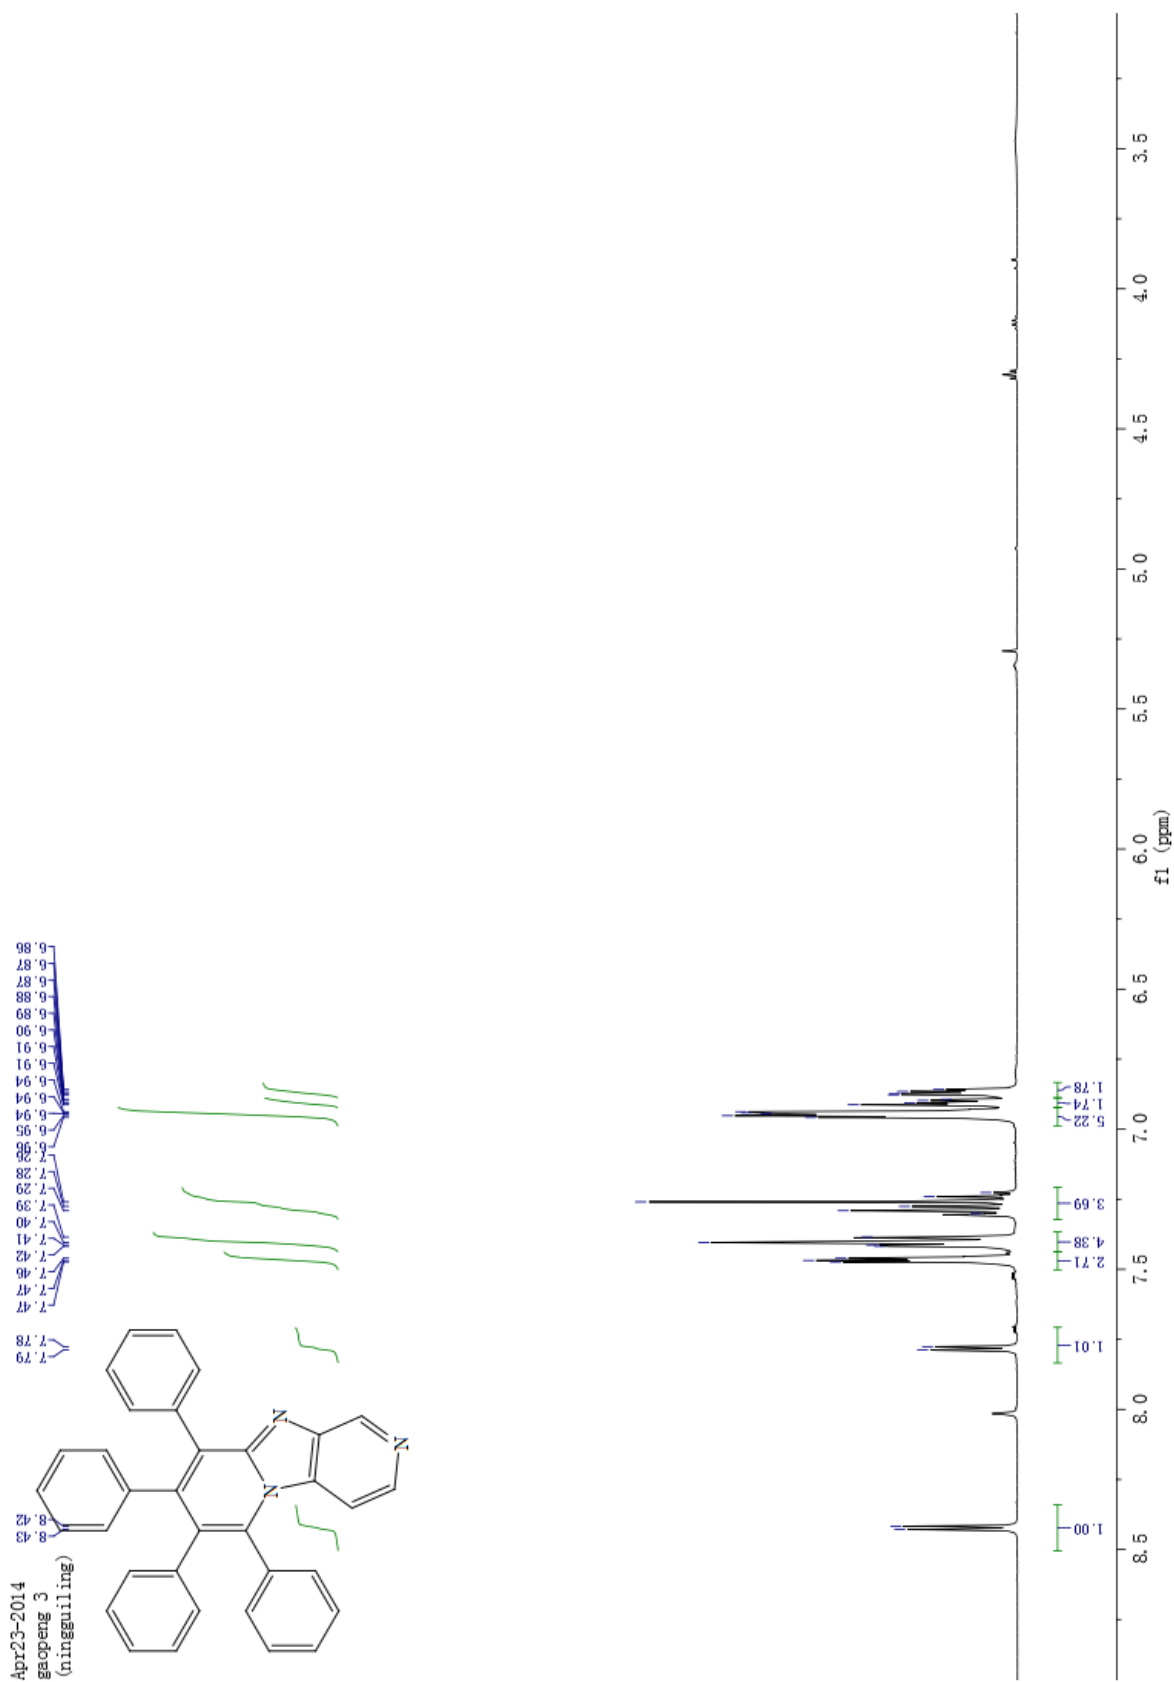



Compound 2p:

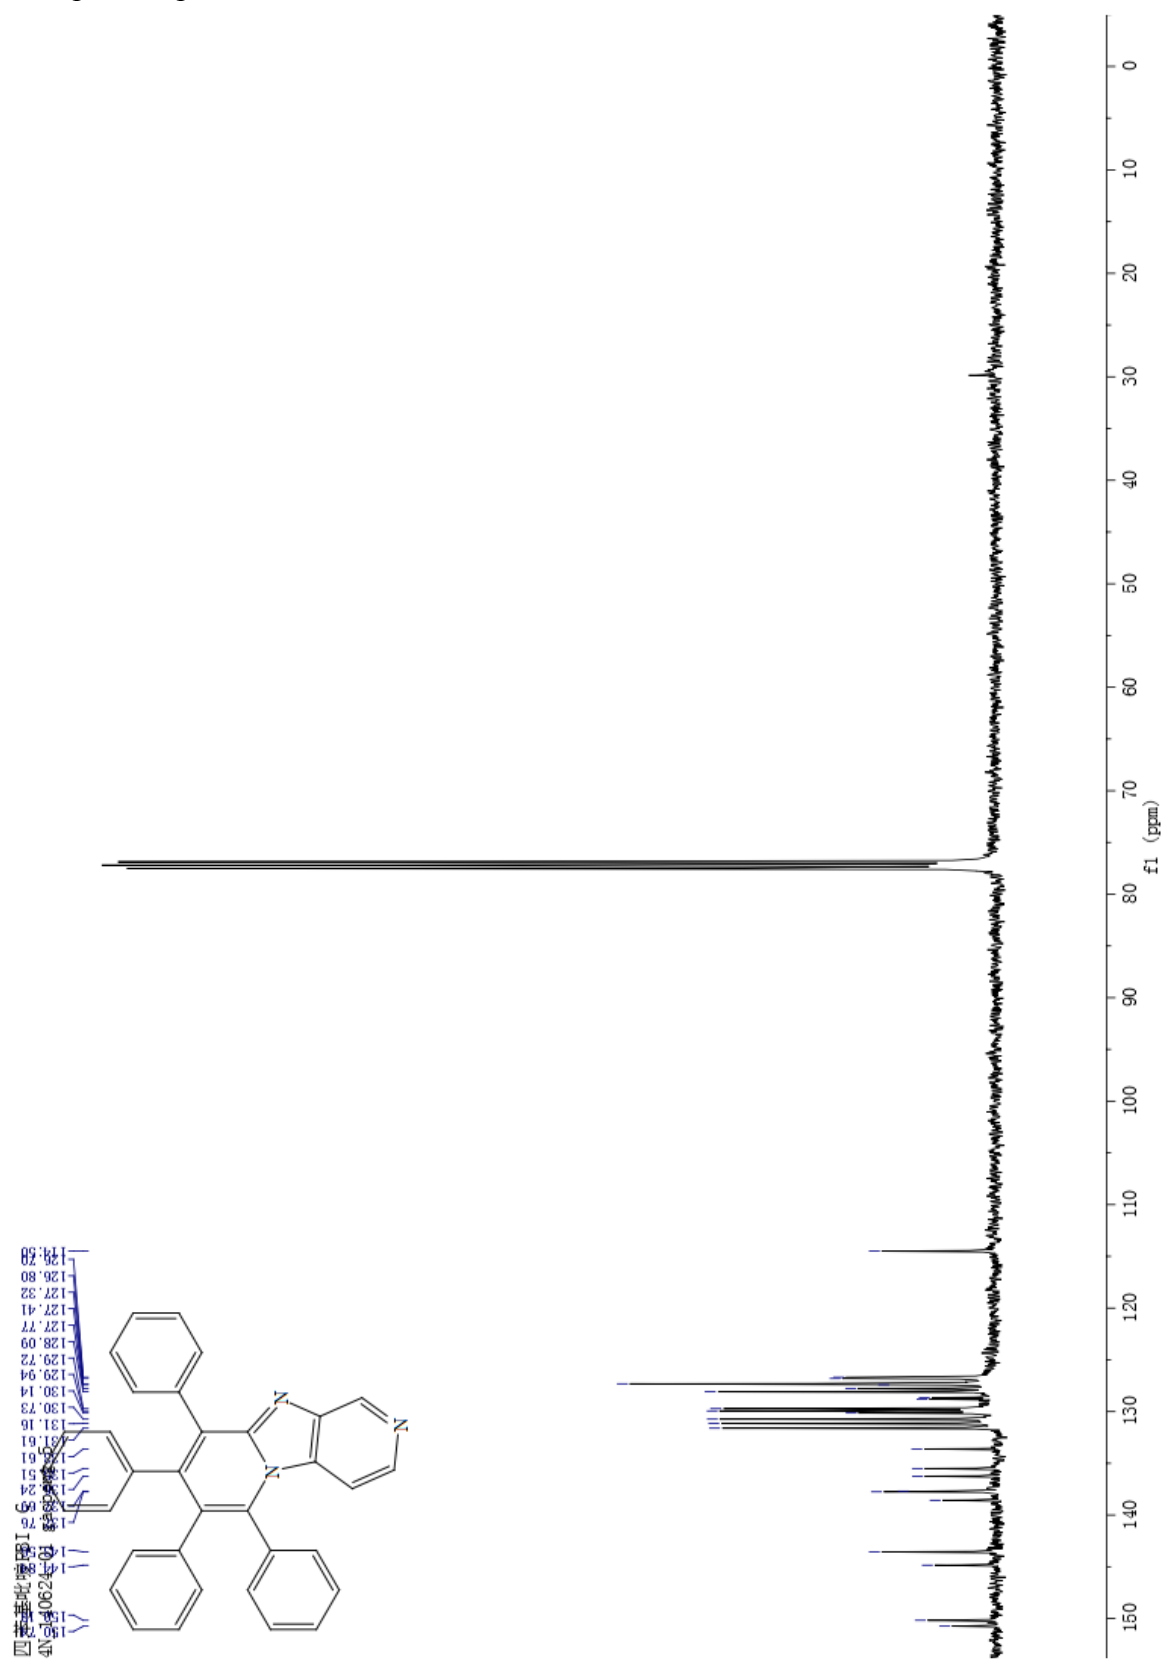

Compound 2j:

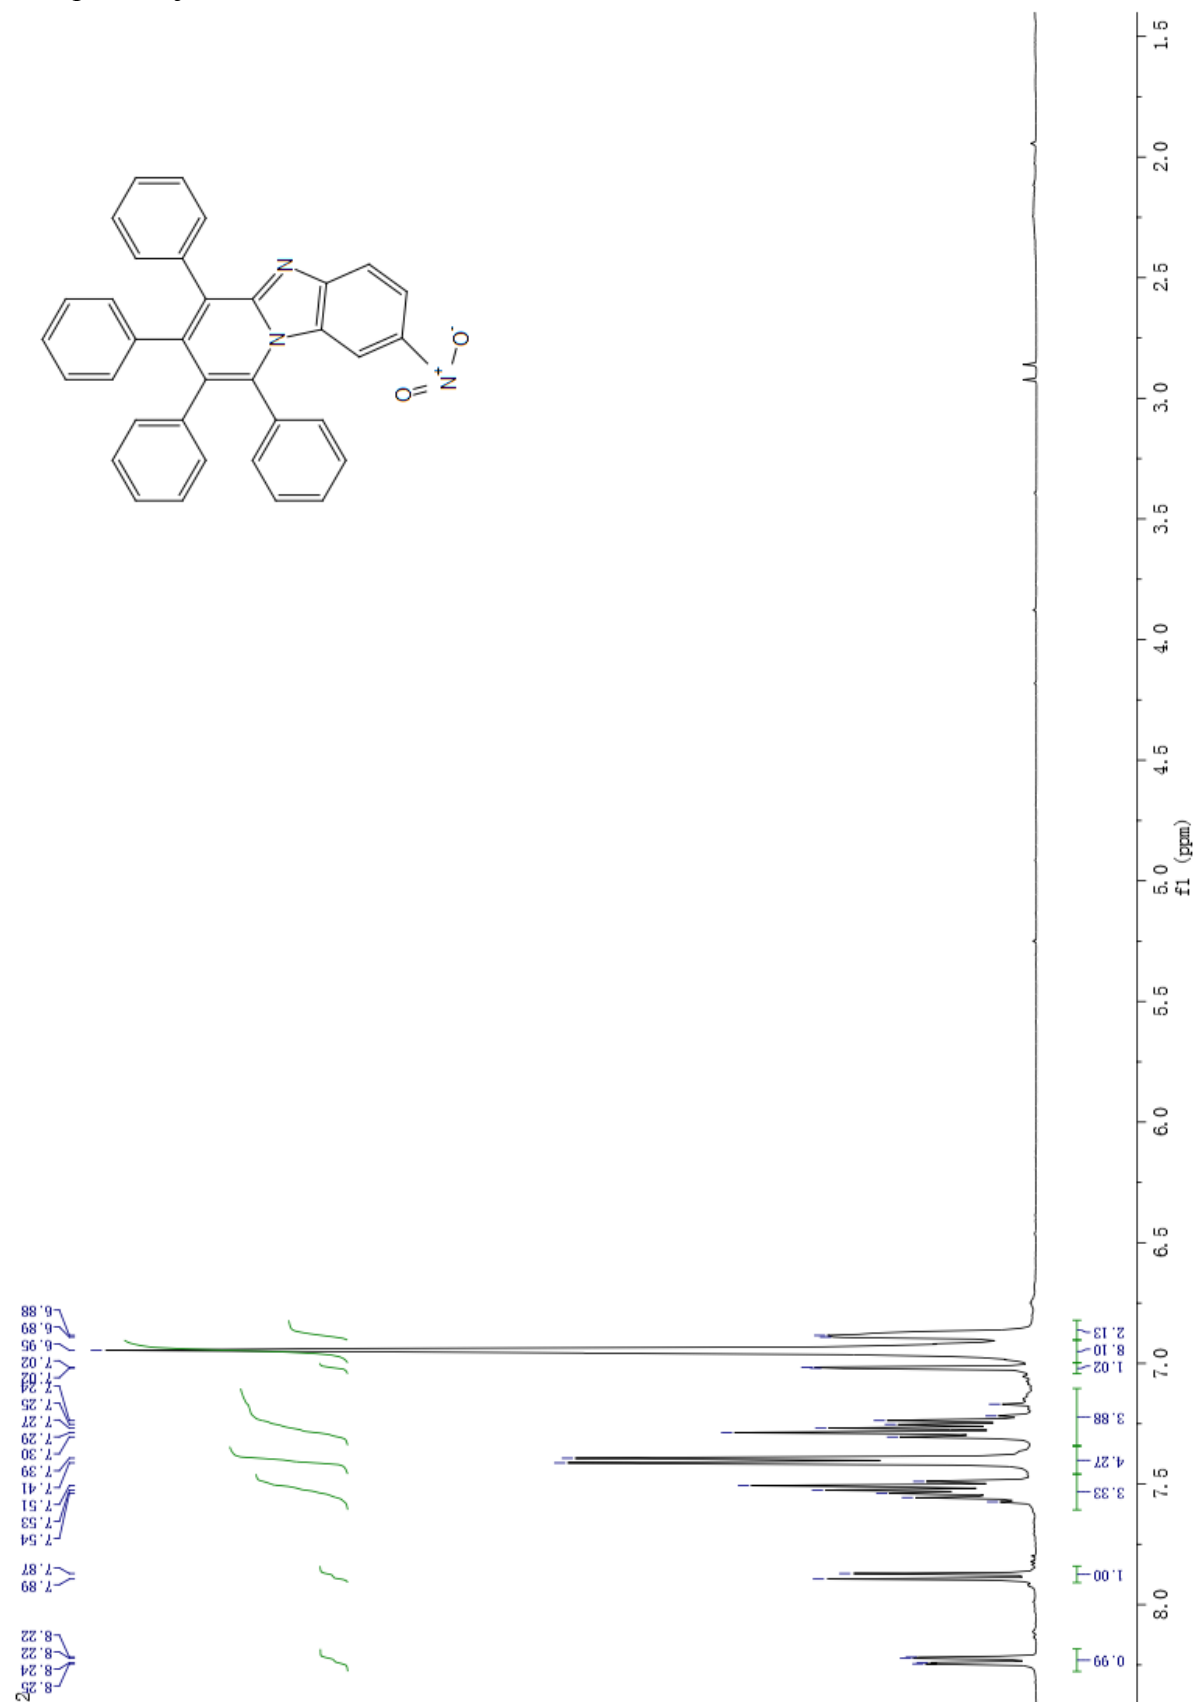

Compound 2j:

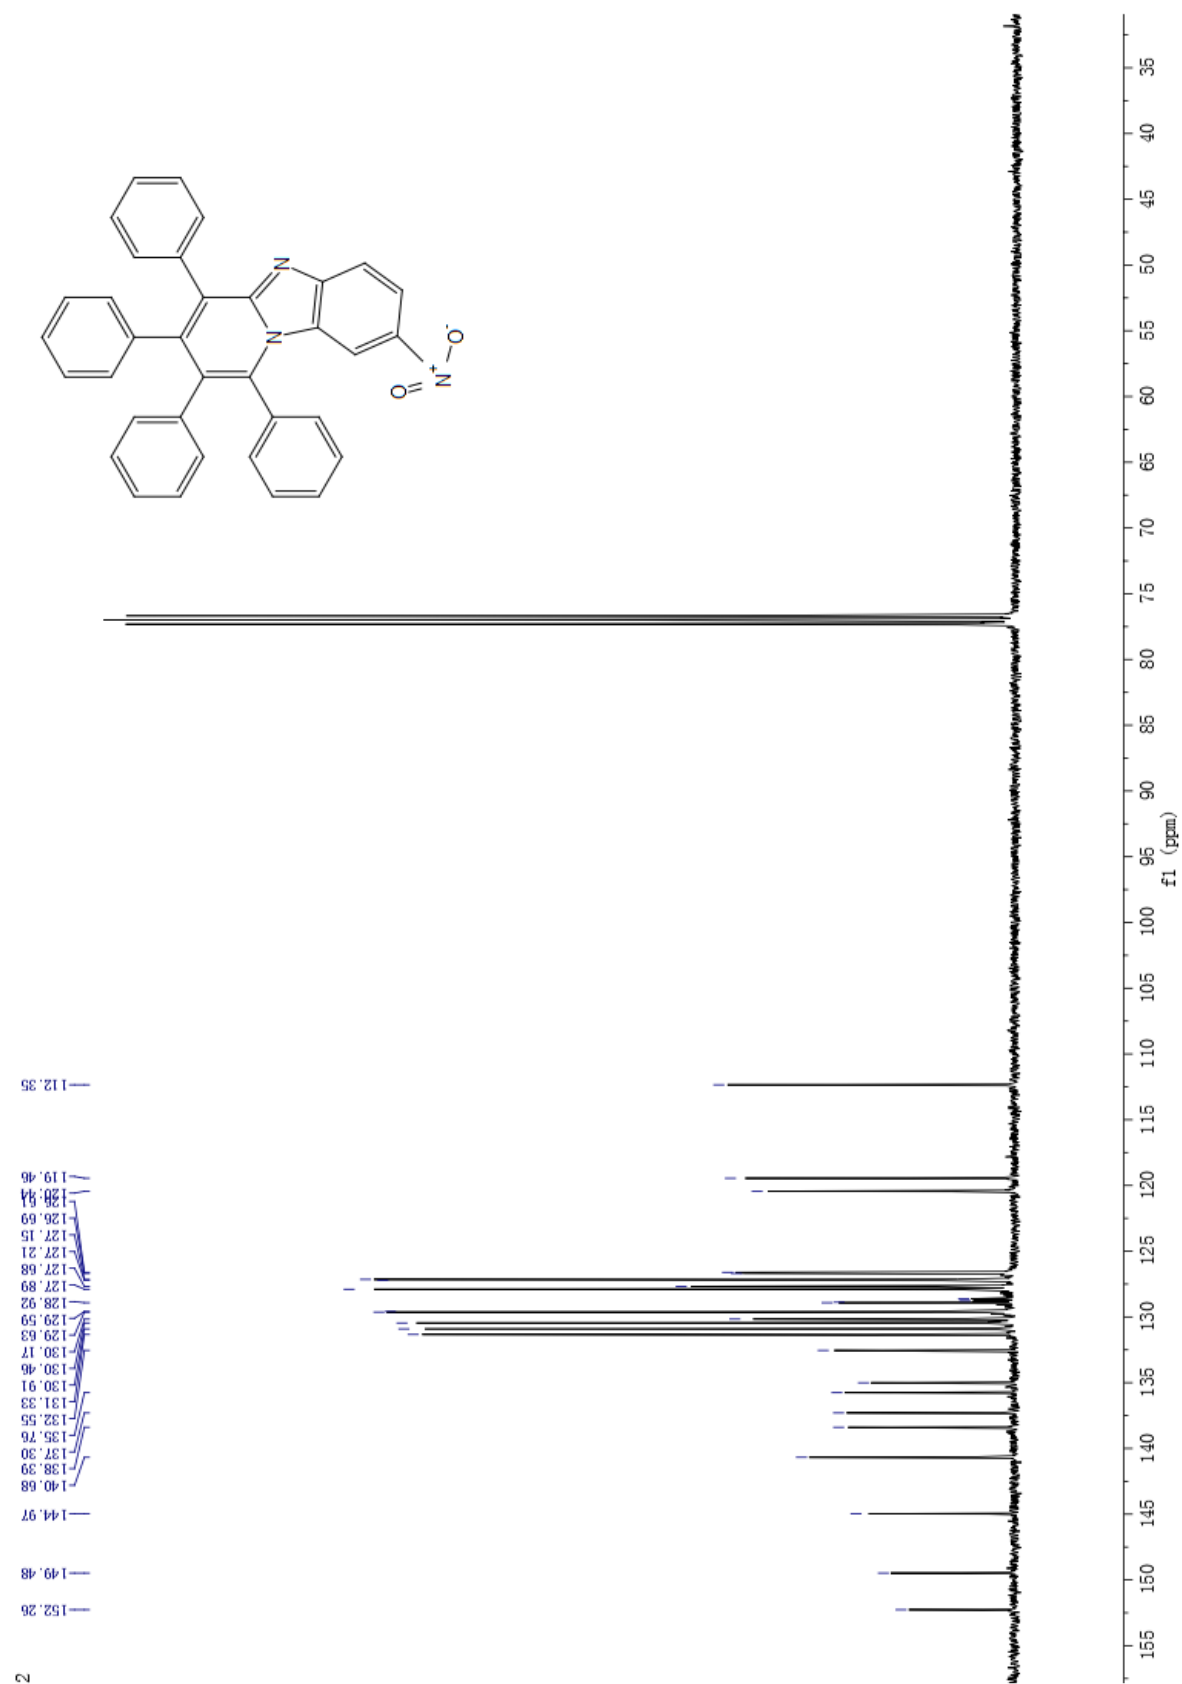

Compound 2n:

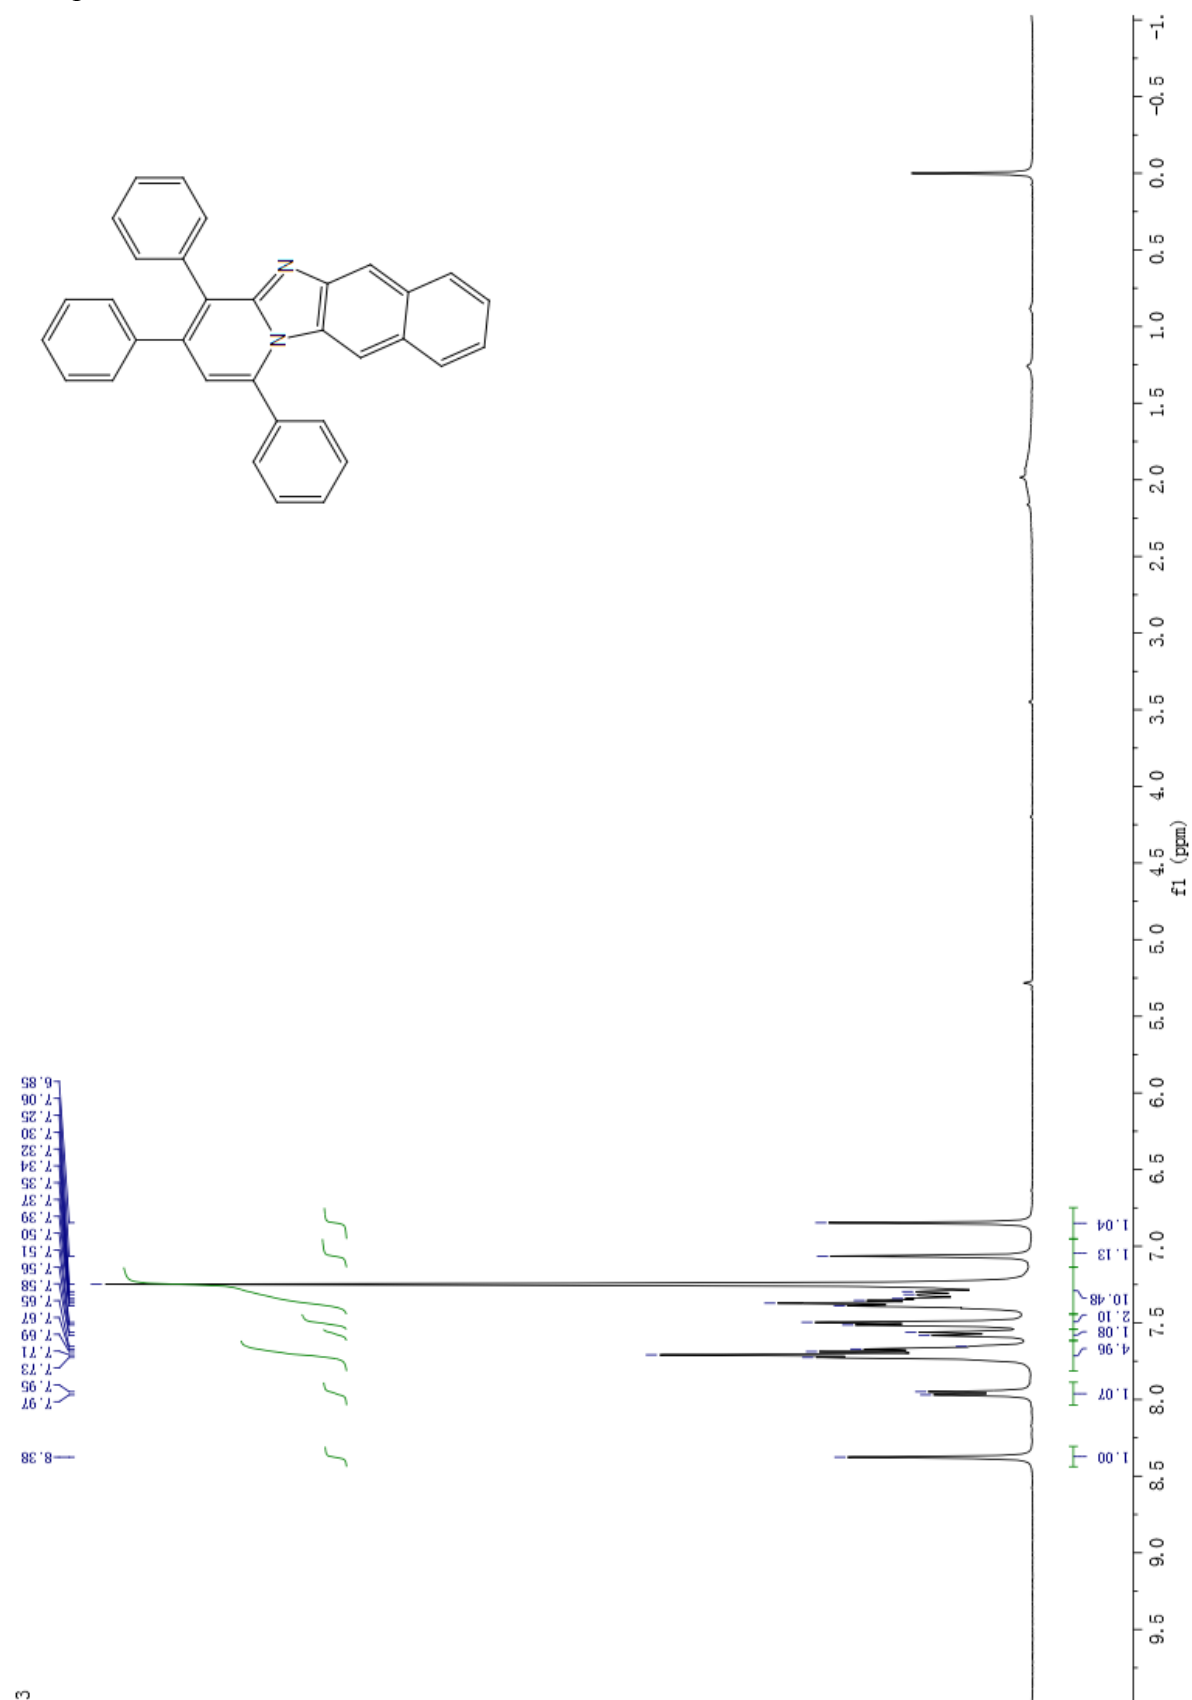

Compound 2n:

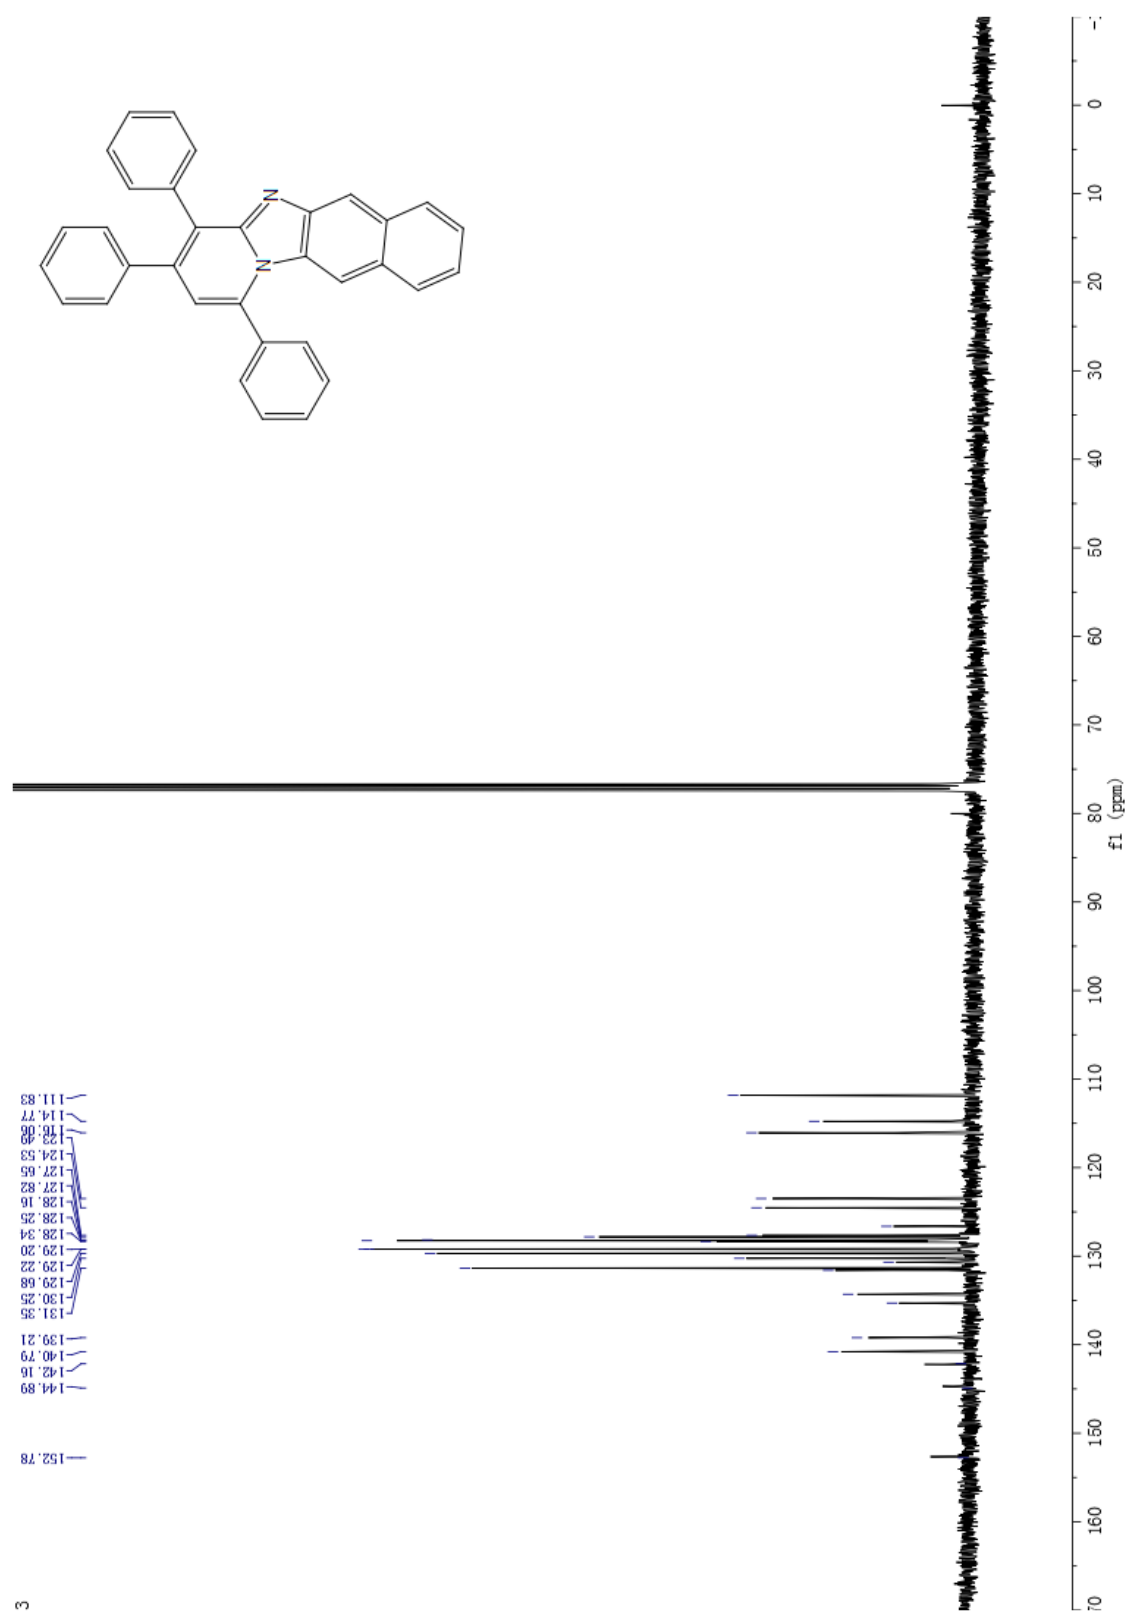

Compound 2o:

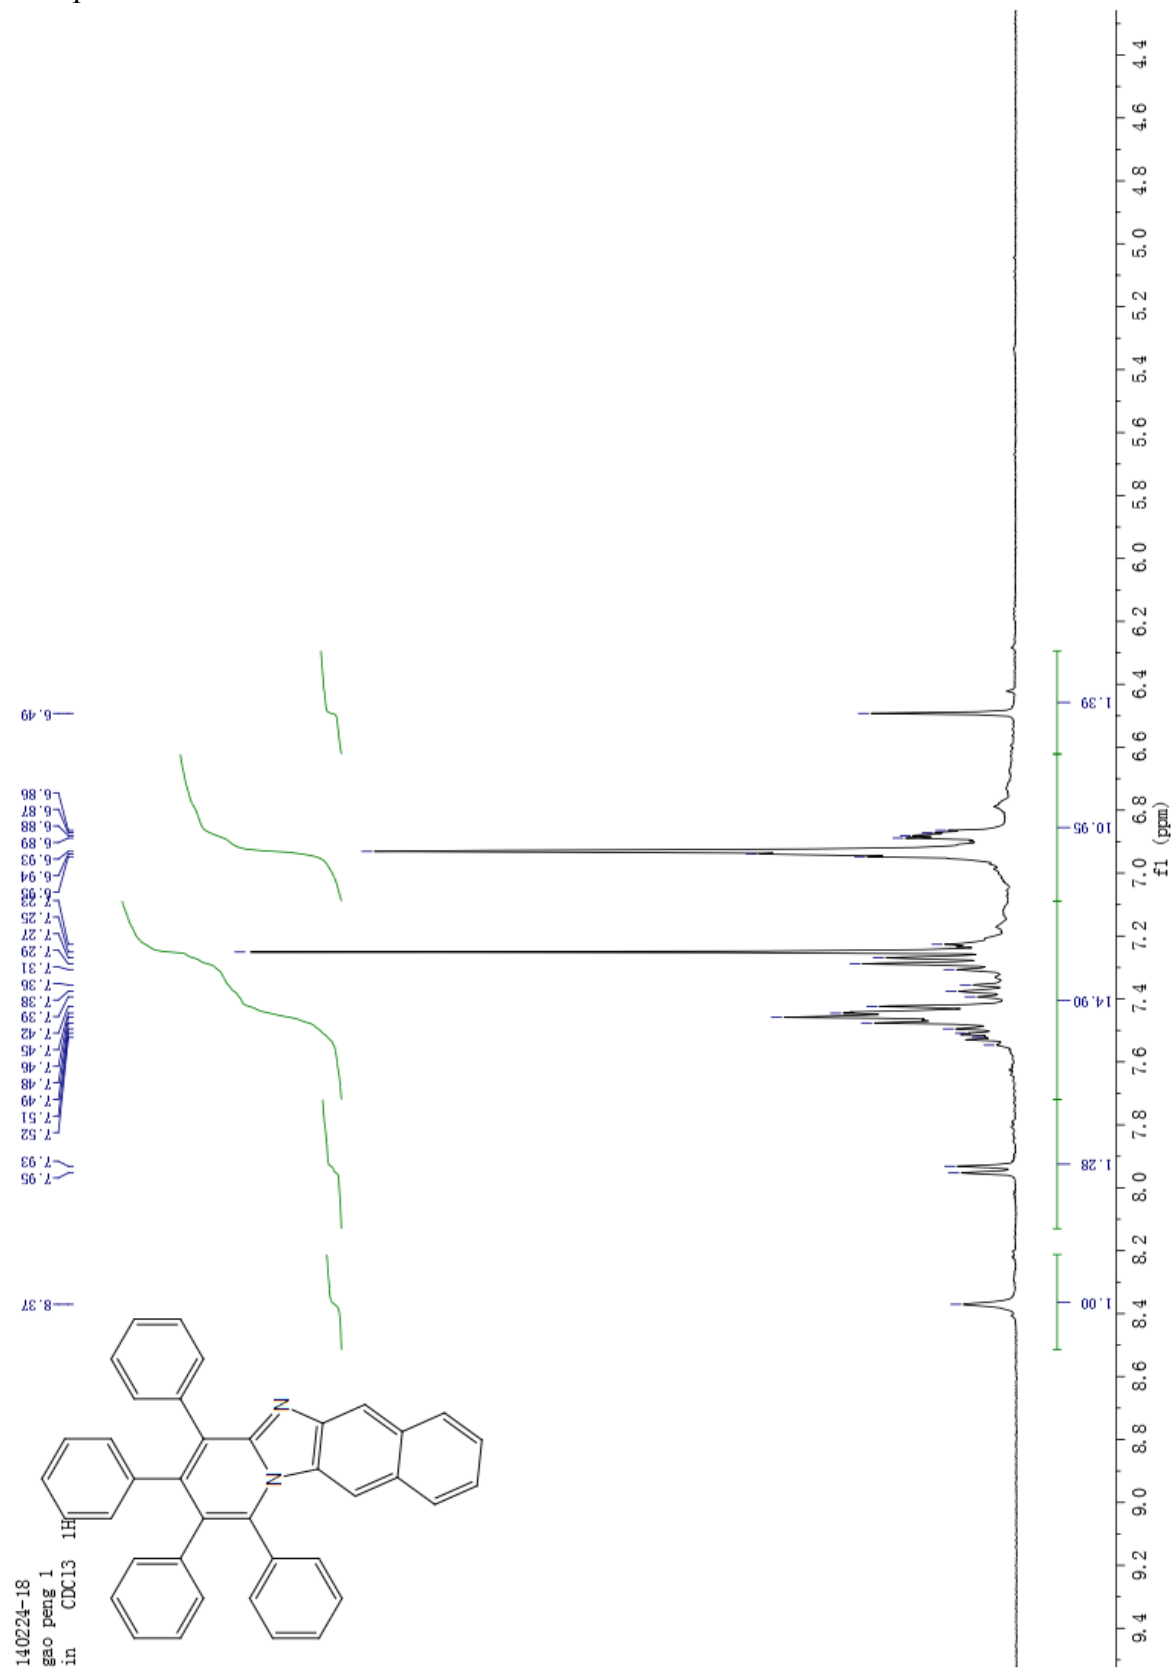

Compound 2o:

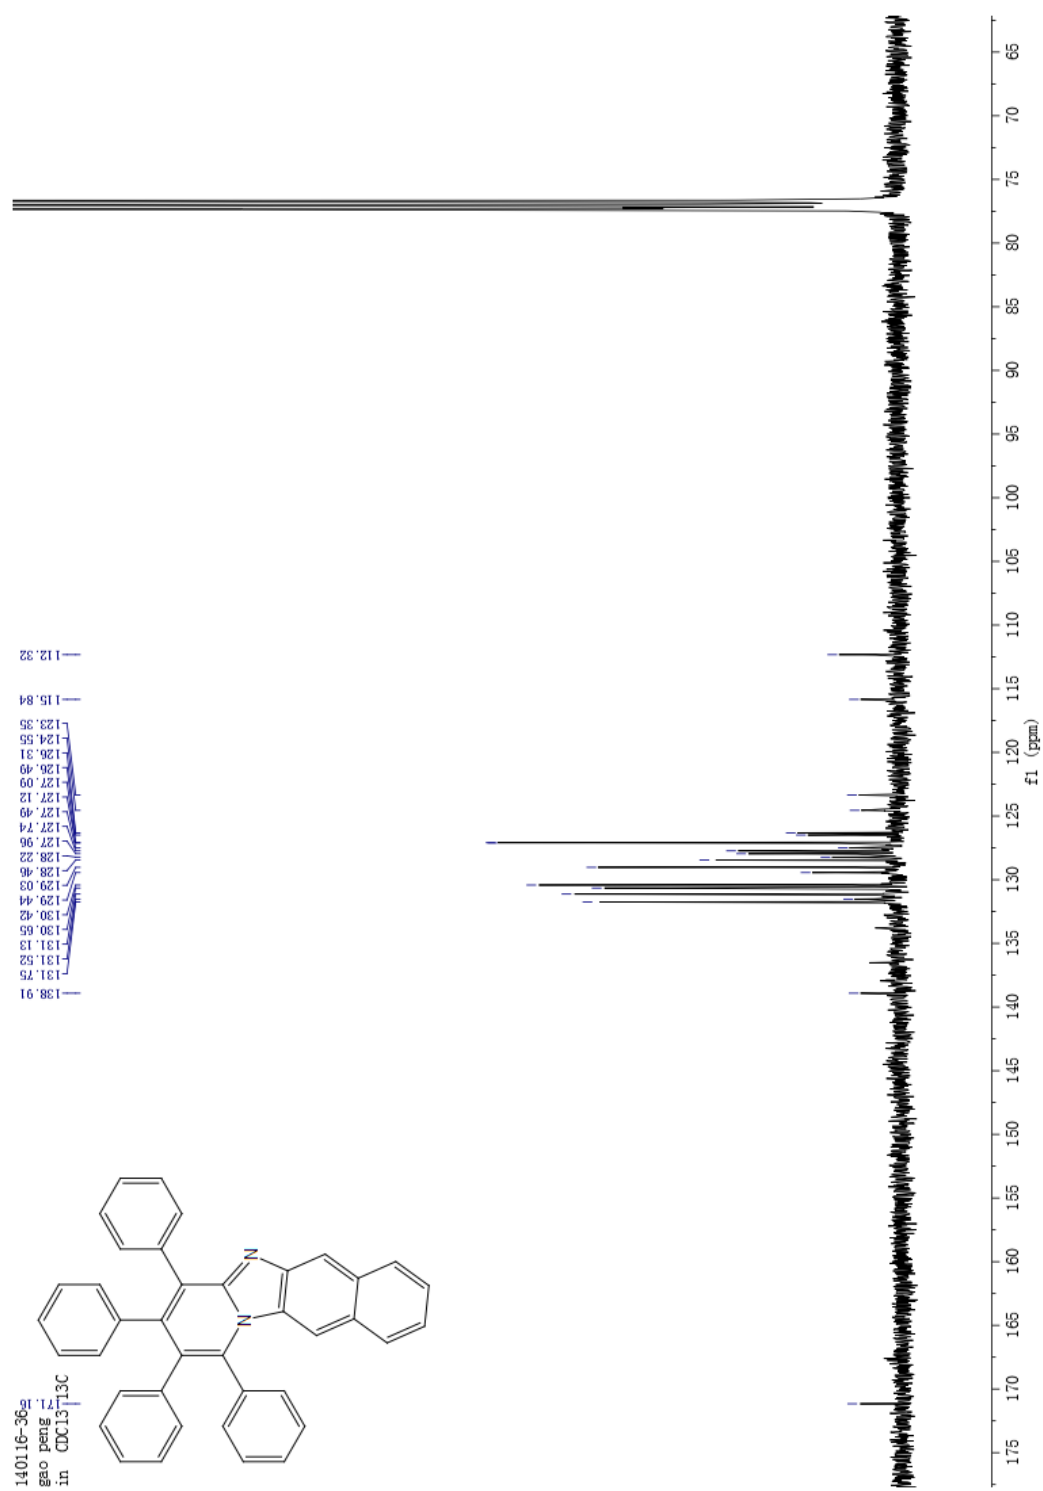

### References:

- 1 A.T.Balaban, A.Dinculescu, G.N.Dorofeenko, G.W.Fischer, A.V.Koblik, V.V.Mezheritskii and W.Schroth, *Adv. Hetero. Chem.*, 1982, supplement 2, 114-115.
- 2 G. Li, W. T. Gong, J. W. Ye, Y. Lin and G. L. Ning, *Tetrahedron Lett*, 2011, **52**, 1313.
